# Supplementary material for: Circadian regulation of endoplasmic reticulum calcium response in cultured mouse astrocytes
Source: eLife journal article supplement (doi:10.7554/elife.96357), 2024-04-05
Supplement: fig2-data3 [file elife-96357-fig2-data3-v1.zip]

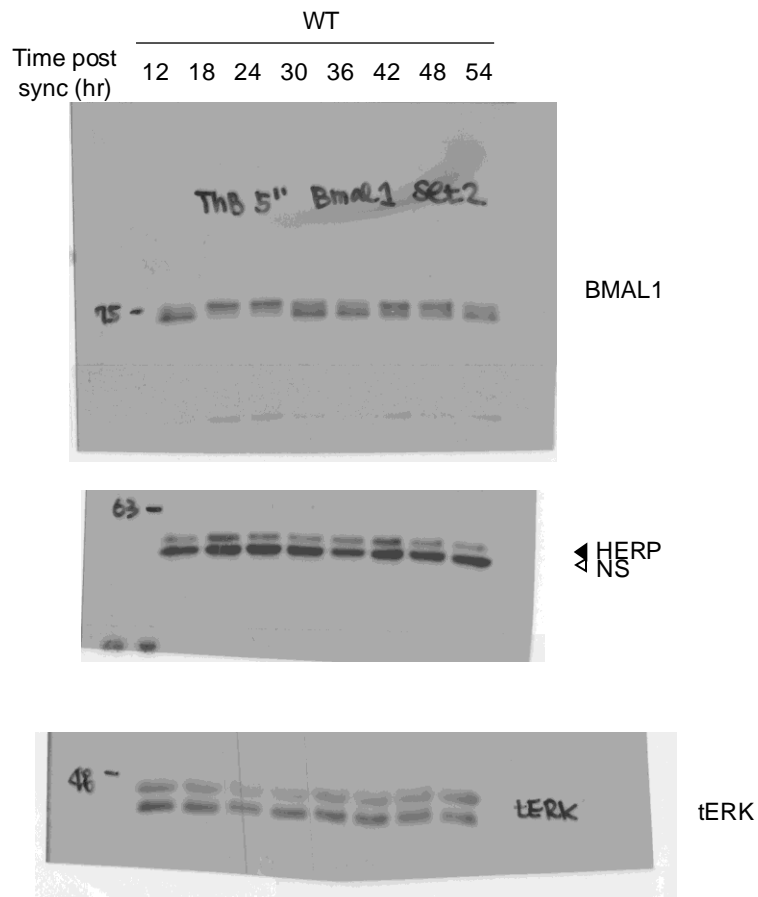

**Figure2-source data 3** Original membranes corresponding to Figure 2, panel F, were used, with Gangnam-stained molecular weight markers.
