# Supplementary material for: Circadian regulation of endoplasmic reticulum calcium response in cultured mouse astrocytes
Source: eLife journal article supplement (doi:10.7554/elife.96357), 2024-04-05
Supplement: fig2-data5 [file elife-96357-fig2-data5-v1.zip]

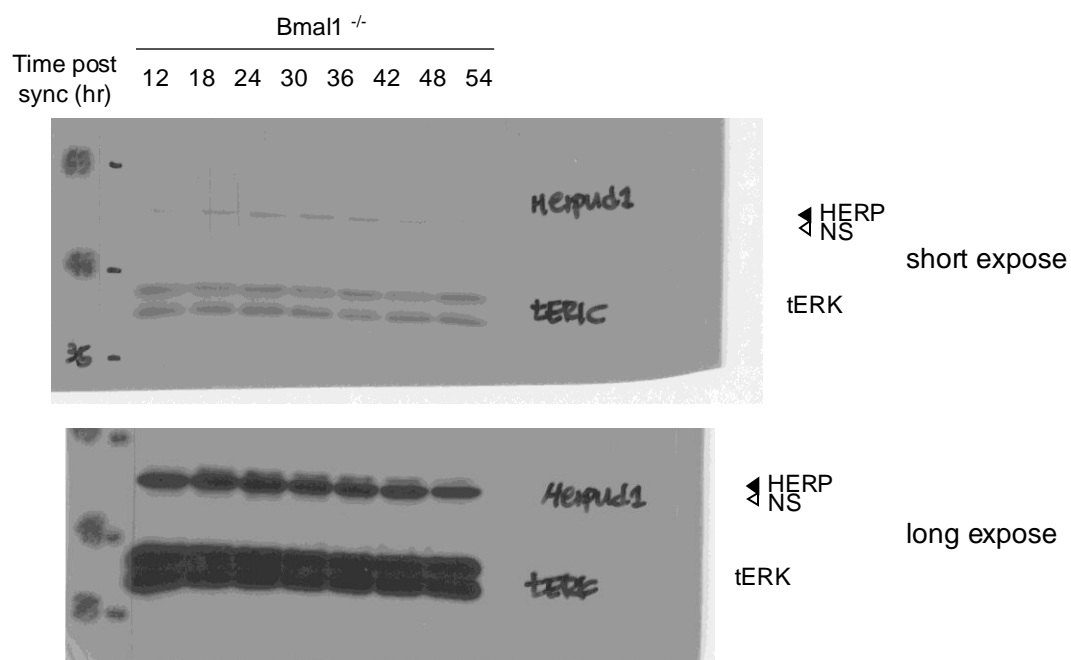

**Figure2-source data 5** Original membranes corresponding to Figure 2, panel H, were used, with Gangnam-stained molecular weight markers. The short exposure shows the raw image of tERK in Figure 2, panel H, while the long exposure shows HERP
