# Supplementary material for: Circadian regulation of endoplasmic reticulum calcium response in cultured mouse astrocytes
Source: eLife journal article supplement (doi:10.7554/elife.96357), 2024-04-05
Supplement: fig2-figsupp1-data1 [file elife-96357-fig2-figsupp1-data1-v1.zip]

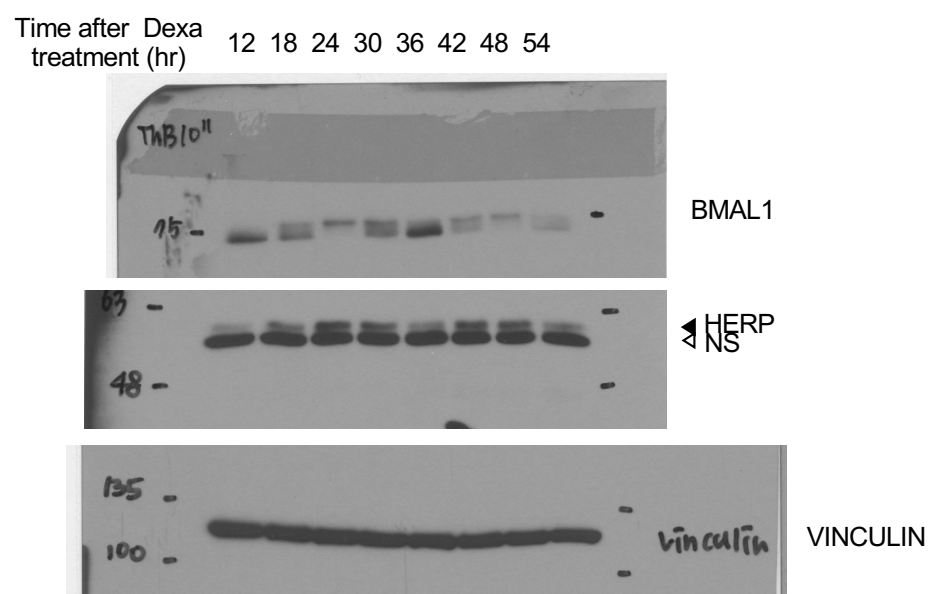

**Figure 2 –figure supplement 1 -source data 1.** Original membranes corresponding to Figure 2 –figure supplement 1 , panel D, were used, with Gangnam-stained molecular weight markers.
