# Supplementary material for: Circadian regulation of endoplasmic reticulum calcium response in cultured mouse astrocytes
Source: eLife journal article supplement (doi:10.7554/elife.96357), 2024-04-05
Supplement: fig3-data1 [file elife-96357-fig3-data1-v1.zip]

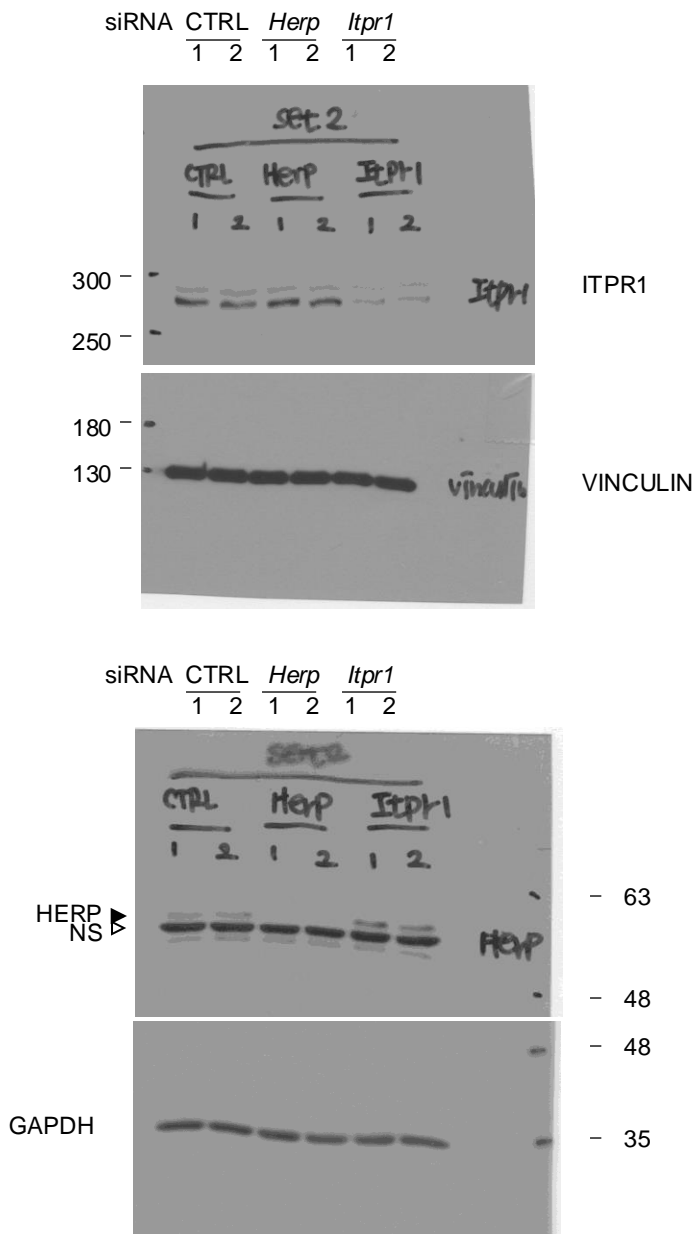

**Figure3-source data 1** Original membranes corresponding to Figure 3, panel J. HERP and GAPDH were used with GangNam-STAIN molecular weight markers (iNtRON, Korea, #24052), while ITPR1 and VINCULIN were used with the Spectra™ Multicolor High Range Protein Ladder (Invitrogen, USA, #26625).
