# Supplementary material for: Circadian regulation of endoplasmic reticulum calcium response in cultured mouse astrocytes
Source: eLife journal article supplement (doi:10.7554/elife.96357), 2024-04-05
Supplement: fig4-data1 [file elife-96357-fig4-data1-v1.zip]

| Time post sync (hr) |  | 30 |   | 42 |   |
|---------------------|--|----|---|----|---|
|                     |  | 1  | 2 | 1  | 2 |

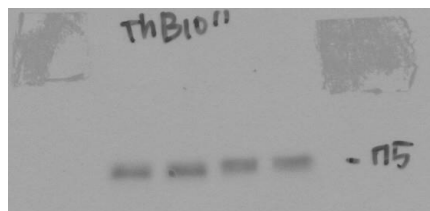

BMAL1

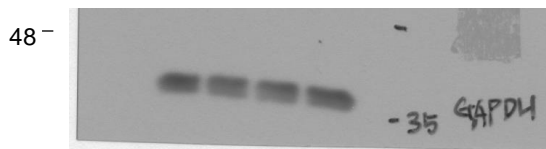

GAPDH

| Time post sync (hr) |  | 30 |   | 42 |   | 30 |   | 42 |   |
|---------------------|--|----|---|----|---|----|---|----|---|
|                     |  | 1  | 2 | 1  | 2 | 1  | 2 | 1  | 2 |

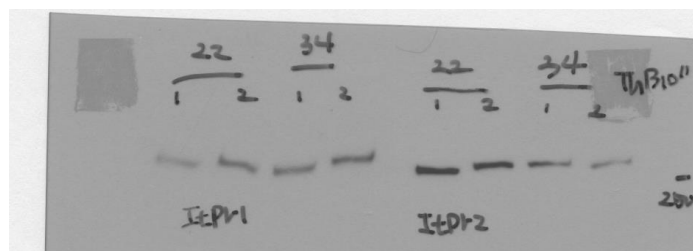

Short expose

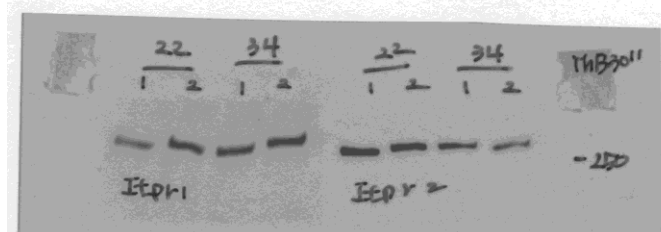

long expose

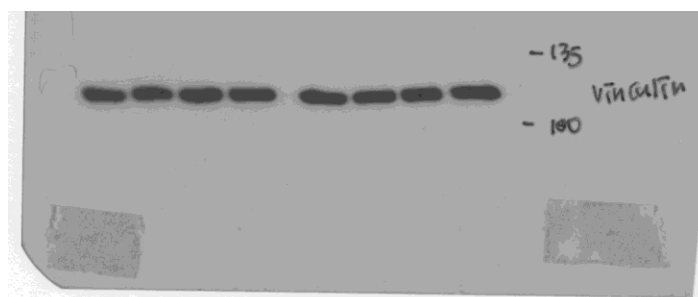

VINCULIN

For ease of internal interpretation, we label "Time post sync (hr) 8 hr" as CT0. Therefore, the values 22 and 34 written on the scan file correspond to 30 and 42, respectively, in terms of "Time post sync (hr)."

**Figure 4-source data 1** Original membranes corresponding to Figure 4, panel N, were used, with Gangnam-stained molecular weight markers. The short exposure shows the raw image of ITPR1 in Figure 4, panel N, while the long exposure shows ITPR2
