# Supplementary material for: Circadian regulation of endoplasmic reticulum calcium response in cultured mouse astrocytes
Source: eLife journal article supplement (doi:10.7554/elife.96357), 2024-04-05
Supplement: fig5-data1 [file elife-96357-fig5-data1-v1.zip]

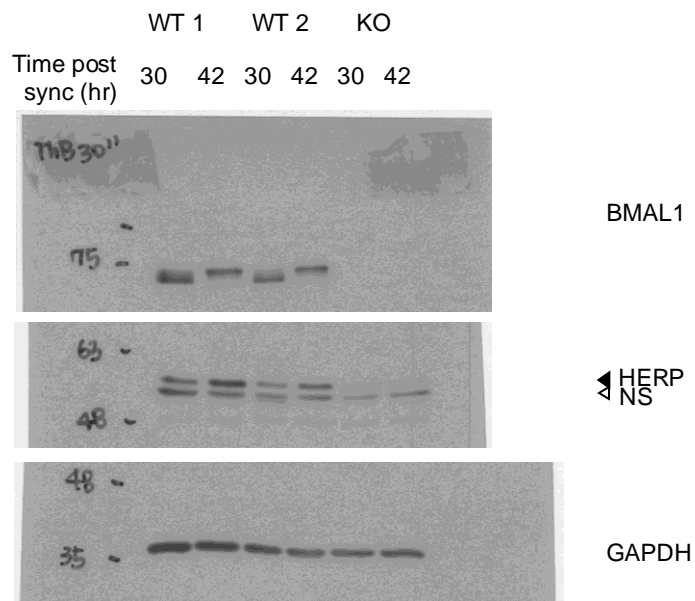

**Figure 5-source data 1** Original membranes corresponding to Figure 5, panel D, were used, with Gangnam-stained molecular weight markers.
