# Supplementary material for: Circadian regulation of endoplasmic reticulum calcium response in cultured mouse astrocytes
Source: eLife journal article supplement (doi:10.7554/elife.96357), 2024-04-05
Supplement: fig6-data3 [file elife-96357-fig6-data3-v1.zip]

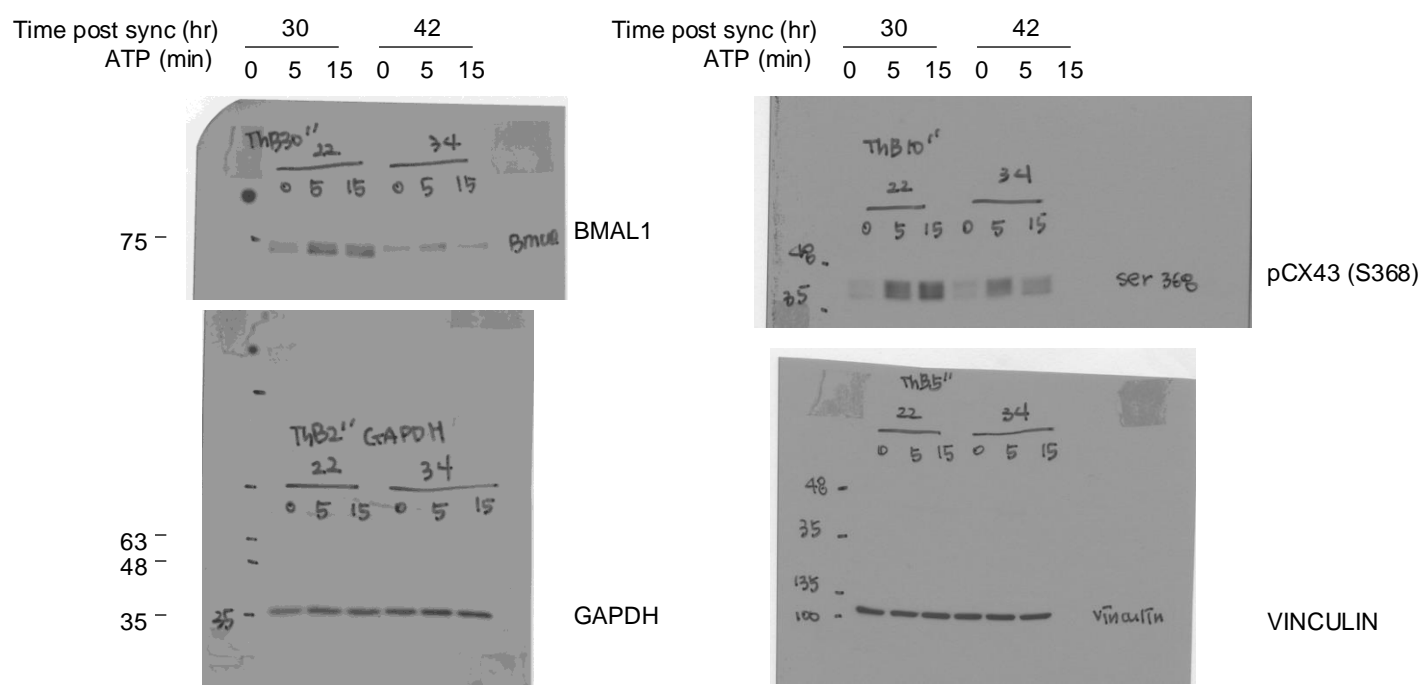

For ease of internal interpretation, we label "Time post sync (hr) 8 hr" as CT0. Therefore, the values 22 and 34 written on the scan file correspond to 30 and 42, respectively, in terms of "Time post sync (hr)."

| Time post sync (hr) |  |  |  | Time post sync (hr) |  |  |  |
|---------------------|--|--|--|---------------------|--|--|--|
| 30                  |  |  |  | 42                  |  |  |  |
| ATP (min)           |  |  |  | ATP (min)           |  |  |  |
| 0 5 15 0 5 15       |  |  |  | 0 5 15 0 5 15       |  |  |  |

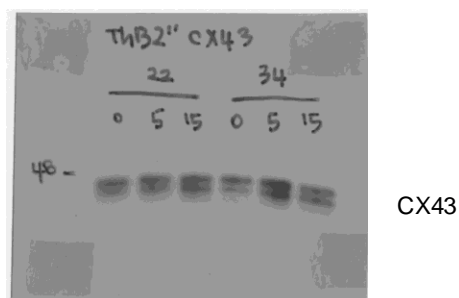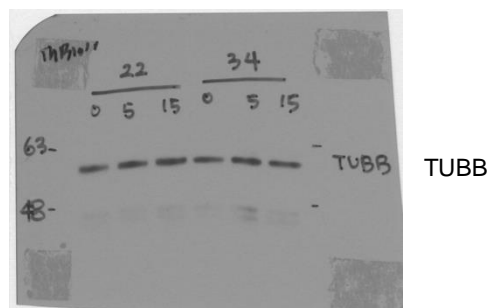

**Figure 6-source data 3** Original membranes corresponding to Figure 6, panel C, were used, with Gangnam-stained molecular weight markers.
