# Supplementary material for: Circadian regulation of endoplasmic reticulum calcium response in cultured mouse astrocytes
Source: eLife journal article supplement (doi:10.7554/elife.96357), 2024-04-05
Supplement: fig6-data7 [file elife-96357-fig6-data7-v1.zip]

| siRNA               | CTRL |   |    |    |   |    | Herp |   |    |    |   |    |
|---------------------|------|---|----|----|---|----|------|---|----|----|---|----|
| Time post sync (hr) | 30   |   |    | 42 |   |    | 30   |   |    | 42 |   |    |
| ATP (min)           | 0    | 5 | 15 | 0  | 5 | 15 | 0    | 5 | 15 | 0  | 5 | 15 |

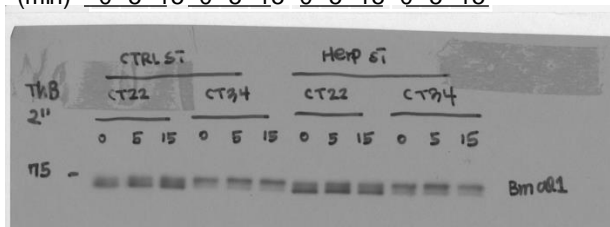

BMAL1

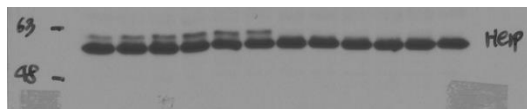

HERP  
NS

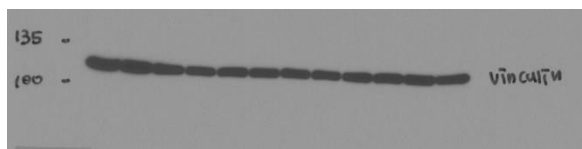

VINCULIN

| siRNA               | CTRL |   |    |    |   |    | Herp |   |    |    |   |    |
|---------------------|------|---|----|----|---|----|------|---|----|----|---|----|
| Time post sync (hr) | 30   |   |    | 42 |   |    | 30   |   |    | 42 |   |    |
| ATP (min)           | 0    | 5 | 15 | 0  | 5 | 15 | 0    | 5 | 15 | 0  | 5 | 15 |

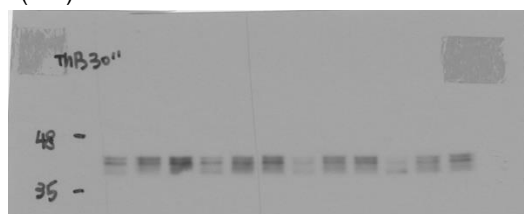

pCX43(S368)

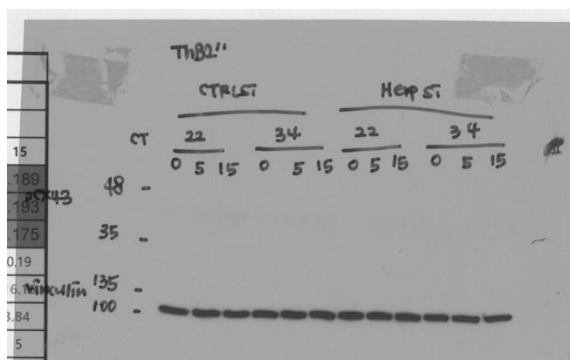

VINCULIN

| siRNA               | CTRL |   |    |    |   |    | Herp |   |    |    |   |    |
|---------------------|------|---|----|----|---|----|------|---|----|----|---|----|
| Time post sync (hr) | 30   |   |    | 42 |   |    | 30   |   |    | 42 |   |    |
| ATP (min)           | 0    | 5 | 15 | 0  | 5 | 15 | 0    | 5 | 15 | 0  | 5 | 15 |

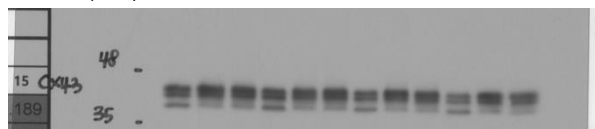

CX43

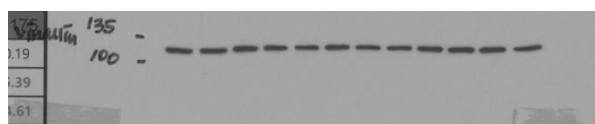

VINCULIN

**Figure 6-source data 7** Original membranes corresponding to Figure 6, panel G, were used, with Gangnam-stained molecular weight markers.
