# Supplementary material for: Circadian regulation of endoplasmic reticulum calcium response in cultured mouse astrocytes
Source: eLife. 2024 Nov 27;13:RP96357. doi: 10.7554/eLife.96357 (PMC11602189; doi:10.7554/eLife.96357)
Supplement: Supplementary file 1. [file elife-96357-supp1.xlsx]

## Sheet: Sheet2
Gene symbol	meta2d_pvalue	meta2d_qvalue	meta2d_period	meta2d_phase	meta2d_Base	meta2d_AMP	meta2d_rAMP	bio_P_VALUE	bio_qvalue	bio_PERIOD	bio_LAG	bio_LAG_24hr	bio_AMPLITUDE	bio_OFFSET	bio_AMP/OFFSET	bio_AVG_REPS_PERIODICITY	bio_REPS_SCATTER	average expression (TPM)												SD
																		0hr	4hr	8hr	12hr	16hr	20hr	24hr	28hr	32hr	36hr	40hr	44hr	0hr	4hr	8hr	12hr	16hr	20hr	24hr	28hr	32hr	36hr	40hr	44hr
Ap1m1	0.000567517	0.0359611	20	0.00688284	121.022	6.70678	0.0554179	0.00833569	0.195977	21.9284	20.7388	22.6979	3.74991	119.86	0.0312857	0.478835	0.446246	141.601	123.416	114.705	115.498	122.134	123.918	119.344	115.032	121.092	124.773	122.175	120.547	12.844	1.34902	2.59064	2.29707	0.0878386	1.83062	2.405	0.232051	5.80175	0.809389	2.27574	5.39831
Emp2	0.00476132	0.179478	23.3675	0.0429408	73.4874	9.48157	0.129023	0.00012544	0.0125298	23.42	22.7071	23.2695	9.91277	70.8388	0.139934	0.953176	0.184348	81.2097	67.4276	56.7412	57.0493	65.7159	77.6113	77.1951	77.6429	75.7381	75.1868	82.4787	92.6958	1.98665	3.07778	1.27755	1.2764	0.357921	2.71404	2.34812	1.8682	2.87375	0.290757	0.4289	4.71312
Gal3st4	0.000424662	0.0288754	23.7699	0.349963	8.97539	1.0993	0.12248	0.00274576	0.107336	23.7354	22.9722	23.2283	1.14256	9.08332	0.125787	0.948498	0.633061	10.9124	8.54437	7.66788	7.86339	8.53652	8.80431	9.83571	9.46406	8.4757	8.32621	9.28675	10.3433	0.899284	0.193109	1.04366	0.254267	0.168707	1.2869	1.32128	0.0926446	0.200388	0.716059	0.214498	1.10628
Gpc2	0.000460046	0.0309246	23.6462	0.363118	5.45095	0.6084	0.111614	0.00113569	0.0594053	23.3845	22.9881	23.5932	0.558101	5.44288	0.102538	0.973965	0.595854	6.8482	5.28161	4.90524	4.93549	5.16522	5.35724	5.95781	5.58961	4.97496	5.02704	5.64068	5.97253	0.566912	0.0455996	0.502888	0.268015	0.0910894	0.530364	0.628881	0.238057	0.021958	0.349425	0.194175	0.664695
Gm28498	0.000451013	0.0305497	24.5709	0.413208	1.31011	0.439053	0.335126	0.00204304	0.0887065	24.723	0.127617	0.123885	0.53914	1.3174	0.409246	0.95555	0.619976	2.27721	1.77848	1.17346	1.01775	1.33596	1.1737	1.82797	1.42225	1.20203	0.567511	0.855692	1.02971	0.912749	0.346357	0.152608	0.0828083	0.551883	0.175245	0.426931	0.0231261	0.068724	0.170588	0.539454	0.0295228
Mir125a	0.361024	1	28	0.492543	0.189052	0.277964	0.277964	0.00047089	0.0309492	27.1242	1.50094	1.32806	0.25146	0.219593	1.14512	0.955737	0.561501	0.88189	0.440714	0	0	0	0	0	0.496106	0.397766	0	0	0	0.110294	0.623263	0	0	0	0	0	0.7016	0.562526	0	0	0
E130218I03Rik	7.84467e-05	0.00774782	22.9917	0.51193	10.3202	0.975839	0.0945563	0.00038025	0.0269522	21.398	0.579492	0.649959	1.07103	10.23	0.104694	0.990049	0.551201	12.1219	10.3837	10.0694	9.02113	9.84839	11.5449	10.3264	10.1258	9.56652	9.37696	10.9092	11.1905	0.688701	1.10124	0.383353	0.299695	0.480161	0.126514	0.358349	0.633795	0.895516	0.167768	0.763317	0.179825
Zfp593	7.5296e-05	0.00747841	23.2142	0.517509	10.462	0.900051	0.0860305	0.00178929	0.0815326	21.4616	0.612916	0.685409	0.905648	10.4021	0.0870636	0.988198	0.614059	12.1761	10.3939	10.1427	9.32357	9.89451	11.7009	10.5158	10.4132	9.90455	9.51948	11.0073	11.1565	0.742127	0.901786	0.73368	0.195237	0.477479	0.263443	0.714501	0.705768	0.649005	0.133772	0.628727	0.19759
Gstm7	0.00313007	0.133987	24.2018	0.685485	37.7973	3.82703	0.101252	0.00032761	0.024543	23.6236	1.38131	1.40332	6.01232	37.2475	0.161415	0.91225	0.324001	46.5177	45.6151	38.7983	37.5587	34.8495	38.6955	43.0254	36.8616	35.4369	31.1026	32.2135	33.5927	2.21073	0.326233	0.148118	0.192395	0.731195	0.281832	7.49683	2.52347	2.19884	1.34925	1.04266	0.943274
Thyn1	0.000506902	0.0331551	23.139	0.985946	70.539	4.44674	0.0630395	0.00131044	0.0660073	22.5588	0.65709	0.699067	4.26876	69.9539	0.0610225	0.802118	0.42538	82.6844	72.7691	67.462	63.6868	67.1484	72.3549	70.6322	68.6482	70.0924	68.4479	71.4655	74.3273	2.29393	0.646435	2.01995	1.48314	1.74799	2.95216	2.02284	1.56612	1.40215	0.662293	1.81365	5.53789
Cdh3	0.00107131	0.0580971	20.4069	1.09086	0.65199	0.113912	0.113912	0.000841	0.0478099	22.2867	20.6961	22.2872	0.123313	0.681381	0.180975	0.843034	0.483474	0.811073	0.607046	0.554012	0.504393	0.727196	0.693942	0.783171	0.669673	0.514192	0.650242	0.857991	0.642854	0.0378998	0.197108	0.0347851	0.0727915	0.0134608	0.0951769	0.00357019	0.0344335	0.100825	0.000545059	0.0258146	0.0429788
Pdgfb	0.00111897	0.0600347	28	1.27595	57.2731	4.71366	0.0823014	0.00048841	0.0317467	26.4247	0.747848	0.679225	4.22536	56.9136	0.0742417	0.946799	0.562442	69.9576	60.458	55.5547	50.9599	54.64	54.3386	58.4238	60.5368	59.3297	55.7485	56.5391	52.8203	5.99541	6.02362	3.89585	2.46617	0.881715	1.41981	4.98304	2.06437	2.50901	0.289105	0.349301	2.43353
Erf	7.99254e-05	0.00780664	27.5992	1.49309	31.1327	2.49551	0.0801573	0.00016129	0.0150085	26.2545	2.19238	2.00412	2.77783	30.437	0.091265	0.978	0.516418	36.5343	34.4627	32.46	27.9515	30.0575	29.2282	31.4408	33.0082	32.2684	29.3852	30.0298	27.7675	2.71459	2.63099	2.66223	0.861767	1.38987	0.250741	0.404083	1.2866	0.560438	0.0783561	1.13373	2.45898
Fcgr4	0.00187241	0.0894881	27.5992	1.79466	2.15119	0.44921	0.20882	0.0009	0.049725	25.9522	2.68159	2.47987	0.505235	2.19464	0.230213	0.977217	0.58634	3.02617	2.86964	2.23042	1.95414	1.50133	1.55075	2.3371	2.50922	1.97208	2.22796	1.9274	1.84847	0.0904915	0.616444	0.109317	0.347981	0.159826	0.261957	0.350219	0.173925	0.0738479	0.389057	0.112519	0.635368
Dtd2	0.000728815	0.0428064	27.2207	1.83893	9.55884	0.451596	0.0472438	0.200077	0.766826	26.7051	2.13964	1.92291	0.49926	9.55153	0.0522701	0.998136	0.997413	10.3348	10.1754	9.61371	9.44432	9.06874	9.29481	9.67696	10.0919	9.65781	9.39439	9.20571	9.03902	0.412641	0.399184	0.316016	0.109334	0.696906	0.45694	0.404964	0.27997	0.224674	0.665265	0.604277	0.572952
Avpi1	0.000358143	0.0250261	27.1164	1.92467	30.9581	4.5374	0.146566	0.00561001	0.159461	25.7854	2.49016	2.31774	3.48034	28.645	0.121499	0.570024	0.264554	49.0289	38.976	35.2946	26.7991	26.5238	27.1564	28.7454	31.5975	29.9875	27.5344	25.1269	25.949	2.98849	0.316221	3.40734	3.53904	1.63249	0.86592	2.73238	2.00357	0.386405	1.36845	1.42355	1.53803
Pim3	0.000243137	0.0186888	27.0137	2.01416	18.2519	1.54567	0.0846855	0.00082944	0.0474579	25.7982	3.14875	2.92928	1.83198	17.7938	0.102956	0.844992	0.405682	22.5085	20.4591	20.6837	16.8126	17.7527	16.4985	17.9763	19.547	18.3195	16.9776	16.4217	15.688	1.02362	0.465683	3.68688	0.757804	0.676275	0.270491	0.455557	0.426544	0.341921	0.44295	1.00543	0.57074
Anxa7	6.0387e-06	0.00100715	26.8131	2.27755	101.798	4.43584	0.0435748	1.444e-05	0.00225928	26.1726	2.88295	2.64363	4.2252	100.574	0.042011	0.986497	0.365411	111.741	110.867	105.278	100.453	96.3678	98.1372	102.02	104.29	102.189	98.984	97.7287	96.7425	0.253458	2.16011	3.02184	2.00799	2.70722	4.15987	2.11051	1.61114	0.307832	0.0960306	1.96668	2.24741
Spp1	0.000111664	0.0102285	26.5235	2.43908	167.903	31.4738	0.187453	0.00978121	0.20754	25.3299	2.15334	2.04028	41.5825	163.197	0.254799	0.440576	0.328673	254.971	230.223	171.967	197.05	110.784	131.79	191.34	192.874	145.638	140.613	128.681	126.387	28.6459	19.2928	1.07327	37.3359	21.893	4.76341	11.936	11.1773	8.59945	5.10146	16.3276	12.5005
Gm25180	0.0973689	1	26.5469	2.50949	0.146963	0.233039	0.233039	0.00025281	0.020693	27.0474	3.68646	3.27111	0.157887	0.129695	1.21737	0.925539	0.370075	0.237675	0.779065	0	0	0	0	0	0.260619	0.518555	0	0	0	0.336123	0.37239	0	0	0	0	0	0.368571	0.0680998	0	0	0
Cacng6	5.07437e-05	0.00543696	28	2.51428	0.342772	0.144243	0.144243	0.00015876	0.0148512	26.7845	2.274	2.0376	0.142665	0.321805	0.443328	0.942217	0.428701	0.758328	0.542541	0.348011	0.273356	0.254476	0.204676	0.337405	0.430261	0.386528	0.319577	0.215223	0.138879	0.0948408	0.0812695	0.0989328	0.064781	0.0480474	0.0124228	0.192726	0.0775787	0.0338193	0.102121	0.0138356	0.0453494
Csrnp1	0.000584308	0.0365017	27.3267	2.90288	6.89141	0.932561	0.135322	0.00019881	0.0168988	26.1722	2.94813	2.70345	0.866717	6.85738	0.126392	0.932507	0.459731	9.29272	8.472	7.47809	5.86116	6.3594	5.87292	6.56439	7.27028	7.57118	6.23234	6.06335	6.30153	1.07424	1.05348	0.233061	0.578039	0.217104	0.472812	0.238978	0.623131	0.14184	0.89417	0.0834047	0.418543
Rrp9	6.65494e-06	0.00105993	28	2.97964	16.014	2.46668	0.154033	7.84e-06	0.00144387	26.5439	3.46191	3.13013	2.27931	16.1142	0.141448	0.997284	0.432053	19.7151	18.1322	17.9726	13.8605	14.4741	13.3152	15.2941	18.2786	18.136	16.3451	14.4954	14.4846	1.51069	1.69948	1.30941	1.37211	0.298979	0.705329	0.140856	0.6216	1.72278	1.00035	0.402367	0.353793
Vasn	8.42267e-05	0.00809263	25.0137	3.00408	89.7484	9.43926	0.105175	4.761e-05	0.00557447	26.0449	2.27445	2.09587	10.1872	89.1537	0.114266	0.972182	0.396513	112.994	100.541	96.6135	82.6275	84.238	79.8997	93.6876	97.0001	91.3244	81.7447	80.1658	78.2077	6.38344	0.165622	4.37739	4.90719	7.82429	9.16634	1.14418	0.837691	1.29479	4.71898	2.48497	7.24105
Ms4a7	0.000452746	0.03055	28	3.21739	35.1898	4.13766	0.117581	0.00077841	0.0460277	26.7061	3.67935	3.30652	3.92094	35.221	0.111324	0.851941	0.498404	41.1665	39.482	36.6458	35.4309	29.7775	28.3504	35.1381	39.9857	36.1538	35.3158	36.9221	32.3852	1.45447	0.145692	1.47895	1.74724	6.14321	1.7485	0.241369	0.823111	0.959243	5.04813	3.14513	0.266401
Nr1d1	3.08934e-09	2.7116e-06	24.3377	3.35835	110.284	48.1118	0.436253	0	0	25.2803	1.58497	1.5047	47.505	111.59	0.425712	0.999936	0.123996	156.363	156.067	103.621	62.9014	64.9109	96.0036	151.999	160.016	115.723	80.0962	78.9544	98.9943	13.3553	3.02412	12.4407	0.541285	0.740131	2.3757	6.88918	6.146	6.21913	0.45226	2.72478	0.100838
Cd200r4	1.04823e-05	0.00154431	26.8627	3.43298	1.03198	0.368805	0.357378	1.521e-05	0.00235888	25.814	3.36478	3.12834	0.38092	1.01779	0.374263	0.985668	0.334789	1.60287	1.60388	1.15602	1.04421	0.492294	0.518636	1.11485	1.33034	1.09999	1.00298	0.753452	0.875093	0.19043	0.0943769	0.183361	0.167665	0.136342	0.0447793	0.238231	0.10835	0.021805	0.0793041	0.0624186	0.117983
Ifrd2	0.0003286	0.0233306	24.7151	3.46904	7.40694	1.09567	0.147925	0.00037249	0.0266624	25.7131	2.84296	2.65355	1.17292	7.25185	0.161741	0.906828	0.447231	10.2305	8.93259	8.12765	6.629	5.96898	6.08928	7.59318	7.59852	7.50499	7.14966	6.04554	7.20907	0.931607	0.230396	0.906859	0.173558	0.639874	0.48372	0.126261	0.675101	0.437684	0.500089	1.44566	0.172795
Jkamp	0.00059122	0.0368035	23.5652	3.49065	47.8742	1.66053	0.0346853	0.00096721	0.0526162	22.9713	3.08401	3.22211	2.06917	47.6059	0.0434647	0.835984	0.589031	51.8391	50.3255	49.5244	46.7762	45.5887	47.2003	48.4167	48.2389	47.4036	45.5044	46.913	48.0967	2.8118	0.116404	0.411942	1.72506	0.792615	0.0356031	2.20642	1.7293	1.45279	0.539206	0.0107278	1.37897
Tns2	0.000494944	0.0328952	28	3.60684	13.0367	1.0102	0.0774891	0.002209	0.0918536	26.5314	3.75474	3.39649	1.21141	12.8587	0.09421	0.734693	0.50296	15.5532	14.1863	13.8036	12.9717	12.6596	11.6338	12.8363	13.7785	13.6615	12.6076	13.022	11.0756	0.281131	0.126464	0.836203	0.30153	0.277231	0.989572	1.45456	0.695573	0.582794	0.434267	0.275724	0.843552
Mapkapk3	4.00208e-05	0.004542	28	3.79207	16.3301	2.16356	0.132489	0.00582169	0.162346	26.3998	4.2763	3.88757	2.13519	16.1836	0.131936	0.557327	0.227114	23.4442	18.842	17.6407	15.547	14.8728	13.3371	15.0428	17.281	17.4046	15.9719	15.178	14.1217	2.05058	0.458895	0.350437	0.121648	0.923324	0.106797	0.266106	0.0252181	0.32612	0.253145	1.35905	1.09755
Por	8.73141e-07	0.000205817	26.4299	3.80053	87.9038	14.6533	0.166697	2.704e-05	0.00364937	25.0164	4.85689	4.65955	17.8047	87.7701	0.202856	0.998541	0.466321	104.648	108.17	109.523	86.8496	73.611	73.9867	89.2077	96.4131	97.3388	82.5726	71.5635	69.8809	21.632	7.2482	15.018	8.14983	5.18287	3.73285	2.88101	4.17017	5.42181	1.27728	1.8146	4.98872
Rsad1	0.000839892	0.0478983	24.1572	3.90579	2.69753	0.495987	0.183867	0.00074529	0.0443661	24.5925	3.65257	3.56457	0.507458	2.64118	0.192133	0.989262	0.578906	3.4687	3.36045	3.30561	2.42187	2.09023	2.25701	2.66069	3.10707	2.78722	2.22233	2.3995	2.35986	0.337971	0.0351376	0.0689889	0.172689	0.338933	0.622944	0.478097	0.465488	0.396306	0.124309	0.0528098	0.314833
Atf3	0.000197663	0.0157409	28	3.98275	17.1568	1.92502	0.112202	0.00045796	0.0304388	26.7372	2.83932	2.54865	1.96948	17.193	0.114551	0.896161	0.3565	21.8338	19.7622	17.5283	16.5034	15.0258	14.2891	17.3248	18.69	17.145	17.6484	17.2546	15.4838	1.13673	0.322947	1.26293	1.17557	1.21489	0.15697	1.52732	0.457164	0.698984	0.0400065	0.550213	0.285464
Ephb1	0.000706451	0.0418321	27.8831	3.98333	1.91415	0.157225	0.0821384	0.00213444	0.0900642	27.2552	7.2041	6.34368	0.257544	1.85703	0.138686	0.93684	0.6221	2.15816	2.07295	2.22306	1.97113	1.89324	1.716	1.65872	1.82603	2.04297	2.09939	1.82266	1.70469	0.263427	0.0998855	0.147838	0.293728	0.0300141	0.0265821	0.168109	0.0211	0.023414	0.014223	0.217844	0.108985
1810013L24Rik	0.00368309	0.150725	23.4853	4.05794	41.2636	2.34561	0.0568445	0.00040401	0.0276856	22.4543	4.69189	5.01487	2.98076	41.3023	0.0721693	0.978915	0.554335	43.0378	47.1934	44.263	40.7025	39.8876	39.9383	41.5909	43.3584	40.3673	37.9261	38.7496	39.2815	5.72021	1.5948	0.266398	1.23297	0.189192	2.71024	0.62346	0.00171663	2.27856	0.989533	1.52469	0.564788
0610040F04Rik	1.01636e-07	4.39793e-05	26.9126	4.07381	7.98652	2.72585	0.341306	1e-06	0.000346667	25.7559	4.71986	4.39808	2.83402	7.89116	0.359139	0.999206	0.348397	8.53659	11.1239	9.83179	6.66657	5.30318	5.33722	7.07249	11.1041	10.6246	8.01838	7.58552	6.7337	0.703686	0.155569	1.22856	0.216279	0.626716	0.664294	1.5054	1.57504	0.195867	0.399725	0.629622	0.867993
Chid1	0.000525235	0.0340133	26.7151	4.67126	39.6664	3.24584	0.0818284	0.00010609	0.0109688	25.9533	6.14819	5.68547	4.23004	40.2016	0.105221	0.968104	0.502455	44.1601	46.4722	45.4888	42.0893	38.4136	35.5035	39.154	39.8725	40.8505	38.8602	36.1343	32.5603	2.9924	3.45842	2.45966	1.58668	0.0598603	1.18552	2.97848	3.83287	2.66344	2.38716	0.700495	0.717717
Coq10b	1.10194e-06	0.000243515	25.8962	4.79957	46.7138	11.4673	0.24548	1e-08	4.91111e-06	24.5504	6.25302	6.11284	11.104	45.6617	0.24318	0.999172	0.189228	43.5651	66.4251	61.8549	44.9999	36.5689	38.7955	41.2751	53.8126	57.7821	44.7088	38.0453	39.5617	6.37453	2.172	0.734052	1.75486	0.577716	3.15045	3.27419	0.0106557	0.930544	0.967644	2.09923	0.919836
Ets2	0.00277727	0.121233	26.8131	4.79964	16.8695	0.965535	0.0572355	0.00013456	0.0128596	26.4224	6.37767	5.79296	1.17848	16.9534	0.0695128	0.950061	0.422538	18.3817	18.6421	18.417	18.1883	16.1756	15.8028	16.3691	17.3101	17.0477	16.6192	16.2018	14.5489	0.177837	0.869447	1.20977	0.282145	0.597572	0.460283	0.25126	0.319195	0.297373	0.90522	0.806299	0.204022
RP24-238C11.4	5.52275e-05	0.00584651	25.7699	4.96122	19.9413	4.45821	0.223567	0.001156	0.060112	23.732	6.10666	6.17562	4.13926	19.5443	0.211788	0.996722	0.59627	18.0644	26.9861	26.9321	17.4905	15.6387	15.8791	19.0911	23.3108	21.9477	19.5194	18.1749	17.1457	3.58241	3.3278	6.93233	1.09328	3.0562	2.72902	1.53745	2.14397	1.46298	1.57238	0.496887	0.210243
Gm25713	0.412933	1	22.9706	5.02935	0.0947331	0.202224	0.202224	0.00038416	0.0269522	23.6266	4.24093	4.30795	0	0		0.904872	0.0200053	0	0.547008	0	0	0	0	0	0.584462	0	0	0	0	0	0.0040632	0	0	0	0	0	0.0488365	0	0	0	0
Tmem86a	0.000115424	0.0104645	24.2018	5.07954	28.8746	3.33088	0.115357	0.00227529	0.0937695	24.9043	4.32282	4.16586	2.96676	29.2499	0.101428	0.997356	0.624652	30.6197	32.0843	31.1323	28.1885	24.6407	24.6374	30.9865	32.1378	29.8816	28.6105	27.6117	26.8365	1.69178	1.92731	2.12051	0.891505	0.37592	2.64578	0.0530588	2.82875	2.89137	3.56076	0.7013	0.101842
Bdh1	8.88479e-05	0.00849049	23.939	5.18954	11.1711	1.49328	0.133674	0.00066564	0.0404416	24.5828	6.31606	6.16631	1.5857	10.9064	0.145392	0.865251	0.169106	12.2484	14.8502	15.1705	11.5535	9.74799	9.85135	10.4493	11.0089	11.0173	10.3763	8.79115	9.26648	0.643816	0.491683	0.108187	0.294528	0.338445	0.952951	0.349192	0.162989	0.0428644	0.41133	0.0737067	0.238944
Sphk2	1.36609e-11	7.24618e-08	24.0253	5.23031	41.1096	17.5143	0.42604	0	0	24.3055	5.15635	5.09154	17.6326	41.02	0.429854	0.999905	0.106577	45.4975	62.4476	59.6461	34.2695	25.176	27.1611	40.0156	55.8887	52.6856	36.2546	26.8239	28.601	4.74939	0.321947	2.85363	2.90096	1.02361	0.692058	0.154473	1.49311	1.00153	0.944161	0.32109	1.00761
Dbp	4.59438e-10	8.02546e-07	23.8538	5.43024	117.136	97.8938	0.835729	0	0	23.8217	5.61108	5.65307	90.4705	109.628	0.825252	0.99982	0.106549	118.801	244.249	230.466	84.4625	27.0083	37.1444	108.554	192.529	177.408	91.1908	42.9661	51.3285	4.01648	15.0353	32.3285	5.70029	1.22429	3.4594	3.14229	15.2528	11.3319	3.08523	0.514622	2.80725
Fam76a	8.18876e-07	0.000200773	26.2921	5.59753	57.7323	6.65343	0.115246	1e-08	4.91111e-06	25.1043	6.91173	6.60768	6.18458	57.136	0.108243	0.998899	0.303347	56.2692	67.6005	68.1863	58.1677	53.0058	53.4089	52.7904	62.0412	63.0874	58.5496	54.4592	52.1039	4.44198	2.79446	1.05076	0.484604	0.820788	1.37781	4.14883	1.55227	1.7399	0.75739	0.632491	1.04664
Bhlhe40	7.54615e-07	0.000193345	23.939	5.60864	46.7676	18.2176	0.389535	1e-08	4.91111e-06	24.3723	5.34321	5.26159	15.4123	47.3047	0.32581	0.999225	0.125717	39.0723	63.9757	55.836	37.1365	31.7021	31.2756	46.2753	66.6603	64.3366	47.9173	39.3983	38.611	3.04183	1.61969	2.15496	1.30928	1.18709	0.744031	3.03275	0.242152	0.0170426	3.65381	2.10171	0.321987
Nr1d2	1.72287e-08	1.0503e-05	23.8538	5.68184	59.8011	27.8852	0.466299	0	0	23.9346	6.39079	6.40825	26.287	58.0792	0.452605	0.999837	0.185099	56.9548	92.175	94.2165	60.1844	31.0929	33.7075	53.9964	80.0931	76.2651	57.7863	40.4642	41.373	10.2906	6.61573	1.78578	3.71935	2.55225	3.40667	8.00941	3.57332	4.21523	1.42116	1.05671	1.5537
Ciart	1.8591e-09	1.93335e-06	23.6056	5.68701	3.19104	3.5102	1.10002	1e-08	4.91111e-06	23.6062	5.85367	5.95132	2.94615	3.06968	0.959759	0.999067	0.0820011	2.19774	7.79909	8.07736	1.24906	0.415599	0.648554	2.35357	5.78596	5.55651	1.93033	0.902238	1.19516	0.0393411	0.315393	0.633177	0.222425	0.00508556	0.157888	0.0484129	0.316103	0.772263	0.0355375	0.102074	0.133531
Bhlhe41	8.61415e-06	0.00129059	23.6056	5.81094	21.2084	5.30902	0.250326	0.00036481	0.0264338	23.3745	5.91542	6.07371	5.13672	21.1473	0.242902	0.998631	0.549504	18.7013	27.4154	26.3278	19.0903	16.0349	16.5947	21.4736	26.4137	23.9919	20.8867	19.297	18.4019	1.85515	1.57375	5.41735	1.81611	2.49436	2.85219	0.702833	2.20163	2.69725	2.19121	0.935415	1.19339
RP24-544J6.4	0.308391	1	28	5.82938	0.338347	0.182317	0.182317	0.00071824	0.0430457	26.3971	5.45102	4.95601	0.086923	0.325772	0.266822	0.860629	0.493363	0.307566	0.331807	0.323901	0.323739	0.0576095	0.246375	0.225857	0.561603	0.556778	0.713719	0.359321	0.351664	0.077386	0.236466	0.0649626	0.0374548	0.0814721	0.203668	0.00729208	0.0884527	0.150462	0.00396894	0.023193	0.0551925
Cry2	4.00788e-05	0.004542	24.2468	5.85251	33.6401	2.78159	0.0826867	4.096e-05	0.00496009	24.1264	5.89551	5.86462	3.40866	33.7224	0.10108	0.974696	0.359626	36.6414	36.5396	38.3536	34.2121	32.5491	30.5192	33.997	36.7574	34.5193	31.7459	30.716	28.1887	2.39272	0.0189673	1.0799	2.60516	1.00184	0.825667	3.34626	0.340347	0.258544	0.409739	0.0455954	0.898041
Hrh3	3.36948e-05	0.00397127	22.9555	6.05544	0.411502	0.218142	0.218142	4.096e-05	0.00496009	22.1294	6.66215	7.22531	0.182272	0.38281	0.476143	0.974745	0.261436	0.294278	0.771189	0.845935	0.376757	0.26667	0.2814	0.31998	0.599642	0.392585	0.247374	0.216803	0.295524	0.0409352	0.00572843	0.177747	0.0381644	0.0459793	0.079903	0.0369002	0.0335158	0.0102378	0.0212308	0.00336982	0.170659
Mir485	0.599498	1	21.6966	6.30343	0.154273	0.304444	0.304444	3.136e-05	0.0040768	21.9657	6.46734	7.06628	0	0		0.979547	0.396786	0	0.410528	0.514522	0	0	0	0	0.87269	0	0	0	0	0	0.580574	0.727644	0	0	0	0	0.0729202	0	0	0	0
Gareml	0.00171857	0.0838342	22.8838	6.39861	15.5322	3.15115	0.202878	8.281e-05	0.00909367	23.2494	6.69313	6.90922	2.50925	16.0569	0.156272	0.962785	0.48494	11.046	18.1184	18.4116	13.9009	13.206	14.8233	15.2749	19.1749	18.1878	15.4727	13.9705	14.4386	2.09992	1.98156	3.40028	0.658535	0.173089	0.294473	0.425765	1.41755	1.97033	0.767275	0.984823	0.262566
Pdxk	3.05414e-07	9.47267e-05	26.9126	6.4098	30.7195	6.33447	0.206203	1e-08	4.91111e-06	26.3373	7.41563	6.75752	7.24254	31.3829	0.23078	0.99876	0.278916	32.203	39.3924	40.2969	34.7221	28.0868	24.1974	26.4509	30.3178	35.7455	32.8481	28.0819	24.8895	0.792408	0.242199	1.83115	3.76771	1.27121	0.0619464	1.58643	1.05273	1.25145	2.05963	2.96341	1.1041
Mest	0.00017324	0.0144468	22.5055	6.43274	64.4837	5.72175	0.0887318	0.00487204	0.149713	21.4409	6.62116	7.41143	5.50931	64.3849	0.0855683	0.991757	0.663993	59.2629	68.3505	68.9101	64.5298	59.306	64.0158	66.6827	73.198	66.4074	60.4042	59.2193	63.6281	2.24249	2.23904	4.38231	2.37764	2.07434	3.74742	3.21339	0.149283	5.09179	2.60335	3.45004	3.93222
Dusp7	0.000322616	0.0229981	24.4299	6.50642	10.5272	1.05411	0.100132	0.00491401	0.149793	24.4285	6.10982	6.00265	1.11331	10.5888	0.10514	0.995399	0.664537	11.0892	10.6502	11.7834	10.3302	9.7037	9.24701	10.4305	11.1595	12.1936	10.4652	9.90261	9.80542	0.0535168	0.340777	0.826869	0.804979	1.11407	0.049077	1.37952	1.08615	0.0530415	0.0832983	0.647713	0.508786
Rbm24	0.000668198	0.0404558	24.8627	6.66961	10.4239	0.750696	0.0720168	0.00285156	0.107496	26.3173	5.75999	5.25281	0.963128	10.4614	0.092065	0.981725	0.634934	11.5415	11.4819	11.4019	11.0243	10.0591	9.6035	9.91388	10.9298	10.7498	10.468	9.53249	8.90246	1.73653	0.688501	0.0984534	0.325017	0.48479	0.679823	0.342445	0.243064	1.42473	0.329455	0.183645	0.0428949
Crispld2	4.24581e-07	0.000125103	24.2018	6.67976	2.86053	1.24571	0.435483	2.56e-06	0.000620011	24.9719	5.77753	5.55267	1.02181	2.7328	0.373906	0.999472	0.392667	2.7596	3.27142	3.57129	2.751	1.48633	1.79405	2.58855	4.29515	4.46691	3.06121	2.36394	2.07975	0.2085	0.151433	0.00124621	0.580558	0.0181878	0.275986	0.660613	0.764997	0.673895	0.18096	0.25431	0.568645
Klf10	1.37764e-06	0.000289944	24.7151	6.94582	15.1873	1.94613	0.128141	0.00045796	0.0304388	25.5836	5.82841	5.46764	2.01574	15.1618	0.132948	0.999483	0.559835	15.7022	16.6549	16.9108	15.0537	14.3251	12.7571	14.9826	17.1111	16.8805	16.0146	14.2419	12.5738	0.440333	0.469849	1.30903	2.06722	1.42975	0.793396	0.615957	0.132898	0.130081	0.584156	2.06371	0.48826
Per1	7.28217e-12	6.43708e-08	23.5652	6.95713	13.7067	4.69506	0.342538	0	0	23.4713	6.94058	7.09691	4.54065	14.12	0.321576	0.999737	0.168069	11.2189	17.332	19.7348	12.6282	10.7156	9.88723	12.6226	17.9262	18.1138	12.899	10.9431	10.1192	0.571499	0.488502	2.51678	0.043677	0.13902	0.914634	0.576255	0.364654	0.00679354	0.991441	0.479799	0.0999846
Herpud1	2.13771e-09	2.09959e-06	23.5251	6.99176	71.1261	11.6618	0.16396	1e-08	4.91111e-06	23.418	6.93648	7.10886	11.346	71.088	0.159605	0.999861	0.271236	66.2734	80.3851	81.7056	70.984	62.8637	60.2096	67.8818	82.8069	82.1441	71.4562	61.7047	65.0963	0.375995	2.17376	2.11582	2.56266	0.109363	1.06936	3.87119	0.669798	1.02199	4.58035	4.15712	5.08898
Sord	3.59838e-08	1.87105e-05	23.5652	7.00859	42.2132	3.59848	0.0852452	2.116e-05	0.00294574	22.8275	7.77935	8.17892	4.22065	42.7184	0.0988018	0.998434	0.461518	41.4053	44.9378	48.5977	44.444	39.9788	38.6687	42.048	44.5503	43.3324	42.5237	38.5855	38.0587	0.509992	1.88888	1.32864	1.68269	1.94333	0.461961	0.641585	3.85455	0.163036	1.06737	2.85681	1.00285
Napepld	0.317983	1	26.7639	7.02247	10.4764	0.599401	0.0572144	0.00061504	0.0381541	26.3792	8.92555	8.12054	0.691735	10.4977	0.0658941	0.872938	0.457832	11.3019	11.4384	12.2253	11.4605	10.8283	10.0577	9.7087	9.88568	10.4192	10.3467	9.9918	9.07281	1.0964	0.192118	0.0755799	0.0107385	0.114506	0.847185	1.02224	0.201926	0.501806	0.296779	0.0570163	0.555963
Tef	1.6395e-11	7.24618e-08	23.939	7.03314	68.9685	24.1951	0.350814	0	0	24.0758	6.85467	6.83309	24.4013	68.3373	0.357072	0.999895	0.185444	64.495	93.952	98.8201	73.2833	48.1471	43.3332	60.495	86.5129	87.2917	68.1462	54.3523	50.0518	5.70486	6.16032	1.88069	0.551267	0.75051	4.74475	4.59506	4.78793	7.26375	1.8318	1.25889	2.5433
Dpysl5	0.000530242	0.0342123	24.1572	7.13707	52.7582	2.72582	0.0516664	0.00057121	0.0360678	24.1445	7.253	7.2096	3.19113	53.4638	0.0596877	0.92095	0.56963	54.2286	55.5921	57.0152	56.0365	51.4781	47.853	53.3256	54.1954	53.394	52.129	51.4737	47.9346	2.92883	2.15677	2.92378	3.01845	0.806178	1.55118	0.688554	0.0674188	0.621996	0.332677	4.37654	0.367239
Tspan4	2.55581e-10	5.96354e-07	24.3836	7.47875	186.789	55.3535	0.296342	1e-08	4.91111e-06	25.0133	7.08322	6.79627	60.66	186.839	0.324666	0.99972	0.302704	187.787	236.466	263.698	209.212	148.877	125.21	160.083	203.624	236.946	198.873	152.67	132.176	36.4479	14.6706	16.1246	5.56389	11.9988	8.5371	14.2645	13.6967	19.1016	7.93034	11.2989	2.45974
Gm15410	4.45966e-05	0.00492765	23.982	7.51606	6.6111	1.8485	0.279606	1.296e-05	0.00210214	24.2267	6.90744	6.8428	1.81393	6.40366	0.283265	0.992762	0.445733	6.48594	7.61595	10.0468	6.50185	4.62407	5.79378	4.81666	8.17675	8.04853	6.99285	5.15811	5.28494	0.348918	0.330922	0.0475613	0.829233	0.873067	0.148347	0.816324	0.188123	1.55576	1.35322	0.548869	1.67539
Inhbb	6.39859e-07	0.000168837	26.6667	7.55019	19.957	2.6402	0.132294	0.00027556	0.0219455	25.5782	7.56044	7.09397	2.69986	20.2852	0.133095	0.999811	0.537845	19.7508	22.1186	23.203	21.5843	19.1047	16.8819	18.844	21.0533	21.9463	21.7626	19.7593	17.3069	2.22295	0.055308	0.14283	0.681998	0.883163	1.40929	0.429296	0.925726	1.06455	2.23945	0.714112	2.07773
1700037C18Rik	2.26947e-06	0.0004409	27.4343	7.73315	21.1907	2.13017	0.100524	1.296e-05	0.00210214	26.9629	7.59361	6.75916	2.15064	21.4128	0.100437	0.996978	0.447817	21.423	22.7789	23.8196	22.5994	19.3084	19.7645	19.9785	20.8519	22.4922	24.2483	20.8004	20.072	0.948758	0.3558	0.109095	0.00419406	0.286554	0.463151	1.66651	2.3401	0.611344	0.774276	0.928881	0.362993
Etv1	0.0007514	0.0436974	27.7681	7.85351	3.5881	0.606737	0.169097	3.721e-05	0.00463291	27.3517	9.0231	7.91741	0.635273	3.59835	0.176546	0.980202	0.476075	3.70915	4.37869	4.64965	4.32134	3.6549	3.05788	2.96946	3.40047	3.36722	3.87759	3.65806	3.15197	0.345855	0.00690152	0.204046	0.0534306	0.422662	0.415051	0.326011	0.275042	0.298228	0.361084	0.285848	0.100249
Per3	1.52265e-09	1.68243e-06	24.1129	7.8536	11.0111	5.03479	0.457248	1e-08	4.91111e-06	24.2706	7.98201	7.89302	5.18407	10.83	0.478678	0.999617	0.194522	9.11021	14.5582	18.6776	14.2258	8.08728	5.32307	8.07557	12.8107	14.3112	12.3776	8.62202	6.48525	1.34332	0.803883	0.222636	1.1527	0.617243	0.232343	1.2219	0.0153442	1.45436	0.84263	0.937697	0.519213
Cpeb1	0.000865992	0.0492279	23.4458	7.85483	14.6854	1.45904	0.0993534	0.0157001	0.250974	23.6092	7.63238	7.75872	1.34266	14.699	0.0913435	0.99437	0.732724	13.628	16.5268	17.3386	15.3603	13.4907	13.3295	13.6376	15.6141	15.3536	14.0734	14.3109	13.6141	1.60574	0.908003	0.349724	0.517282	0.690733	1.60176	1.15604	0.439755	2.23112	0.675504	1.10822	0.374667
Dnaja2	0.000146003	0.0127782	24.1129	7.92939	110.151	6.56674	0.0596156	4.489e-05	0.00539901	25.086	8.14134	7.78888	6.78776	109.916	0.0617543	0.97369	0.268787	109.092	120.751	124.695	117.675	107.319	105.034	101.701	110.367	111.603	108.634	104.416	103.753	0.909058	1.20879	4.13692	1.89988	3.45663	0.475287	1.25251	0.73942	2.31691	1.09623	1.01055	4.60644
Hlf	1.01994e-07	4.39793e-05	22.9917	7.95762	5.08975	2.15288	0.422983	1e-08	4.91111e-06	22.7895	7.94206	8.36392	1.98189	5.10277	0.388396	0.99917	0.243517	2.5657	5.82495	7.83407	5.19461	3.4247	3.34166	4.55569	6.53832	7.36016	5.31364	4.06902	4.31982	0.372622	0.596226	0.218639	0.419459	0.191485	0.335924	0.661906	0.0212071	0.86285	0.0896161	0.513868	0.498444
Rabl6	6.51818e-06	0.0010572	27.5438	8.05739	44.1366	3.2023	0.0725542	0.00084681	0.0479859	26.7948	8.5134	7.62542	3.00446	44.5895	0.0673804	0.998342	0.583311	43.8433	46.3431	48.2973	46.6034	44.1284	41.0015	40.3363	44.2026	46.3906	45.7677	45.5979	43.5529	1.49748	1.92688	1.39204	0.176345	3.59278	0.187531	1.12424	0.948388	0.404785	2.69228	1.41335	0.910195
Cx3cl1	3.12831e-05	0.00371177	27.9413	8.17578	78.7131	8.76487	0.111352	0.00019881	0.0168988	26.7111	9.06129	8.14161	7.99965	78.764	0.101565	0.933337	0.399744	81.1082	80.475	85.1762	82.7915	81.5596	66.6509	69.7144	77.227	86.4291	86.5723	88.4833	76.0916	7.46271	2.34357	1.37225	0.340757	1.70901	0.73784	2.32658	0.121429	0.41682	4.59891	9.10168	1.8576
Nmnat2	0.0178166	0.458947	27.0137	8.17625	25.9679	3.92642	0.151203	1.156e-05	0.0019652	26.6084	9.57204	8.63372	3.59125	25.6374	0.140078	0.987913	0.266319	27.1738	30.4557	33.3328	32.3236	27.6934	22.6932	22.3218	23.1972	25.5149	26.8437	25.1964	21.193	1.39445	1.78464	0.420799	2.68581	1.06859	0.16024	0.305072	0.608888	0.874711	0.180545	3.01785	0.133267
Mtus2	0.116875	1	26.6667	8.22976	1.47491	0.241111	0.163475	0.00057121	0.0360678	26.0899	9.87758	9.08635	0.259637	1.49362	0.173831	0.878011	0.532111	1.57127	1.6866	2.07444	1.87838	1.59576	1.21851	1.32332	1.30487	1.37901	1.49387	1.38875	1.13373	0.150269	0.162219	0.0300215	0.155679	0.2114	0.171794	0.188597	0.0788158	0.165197	0.283451	0.0702387	0.0881575
Sstr2	8.31995e-09	6.12869e-06	27.2735	8.26344	21.0773	5.14204	0.243962	1.6e-07	6.42909e-05	26.7778	7.89314	7.07434	5.30406	21.2609	0.249475	0.999675	0.334916	18.5646	23.2549	25.8886	22.1991	18.1534	16.3469	16.8474	22.0368	27.8676	26.6727	23.2786	20.2911	2.95004	1.12568	0.522462	0.413918	0.83491	0.0434126	0.630289	0.982512	1.74804	2.95825	1.99954	1.2189
Slco1a5	0.000124483	0.0112283	26.3377	8.27321	74.0203	9.10286	0.122978	1.369e-05	0.00218053	25.284	8.50998	8.07782	8.66832	74.1896	0.11684	0.98679	0.289782	68.9148	85.9041	91.1205	83.3535	72.4953	66.7693	66.7762	72.2833	78.1107	76.7486	68.5753	69.5779	3.06969	0.273565	0.262481	3.89578	7.49952	4.18293	3.19033	1.03116	0.177283	3.15145	0.0250174	1.3349
Naa60	2.8201e-08	1.59248e-05	26.8131	8.3291	75.3174	11.0489	0.146697	0	0	26.1005	8.76765	8.06205	10.4619	75.2888	0.138956	0.999649	0.148703	70.4535	83.8194	91.4702	86.0284	73.3596	67.5537	65.5973	73.0468	83.2888	81.3812	75.5612	69.212	1.68943	0.210511	1.39661	0.345074	0.897678	0.781296	1.18501	2.26509	1.36003	2.84262	1.38509	0.36618
Lonrf1	3.91191e-05	0.00449082	23.939	8.34785	8.65948	1.10373	0.127459	2.25e-06	0.000620011	24.0189	8.38528	8.3787	1.04986	8.61596	0.12185	0.998722	0.386106	7.55059	9.7242	10.3402	9.63139	8.00662	7.53764	8.07116	8.8213	9.27641	8.93354	8.22554	7.98138	0.672207	0.120864	0.812088	0.184454	0.173273	0.130799	0.425236	0.999805	0.0794943	0.164307	0.0805972	0.414955
Smpdl3b	4.9935e-10	8.02546e-07	26.6186	8.3806	14.8353	4.97407	0.335286	1e-08	4.91111e-06	25.7067	8.87118	8.28221	4.70167	14.9168	0.315192	0.999694	0.260163	12.6322	17.6983	22.4334	18.6926	14.7238	10.8224	10.6275	14.3693	18.3268	18.0459	14.7988	11.5782	1.37012	0.309885	1.32091	1.79115	1.06585	1.10771	1.34139	0.0370228	0.739963	0.00763925	1.70328	0.696593
Ctdspl	1.41564e-08	8.93825e-06	23.3288	8.43368	27.7693	2.85828	0.10293	1e-06	0.000346667	22.8889	8.53034	8.94444	2.78589	27.9303	0.0997445	0.999859	0.34303	24.8726	28.9418	31.5876	29.4693	26.2296	25.1443	26.6792	29.5766	30.0668	28.3344	26.5958	25.5854	0.758233	0.316038	0.610035	1.59005	0.598537	0.228324	0.845704	0.984486	0.323848	0.627686	2.08356	0.0428502
B4galt5	0.000562405	0.0357653	22.8483	8.48127	26.8533	2.61726	0.0974652	0.0157503	0.251136	21.9483	9.50058	10.3887	2.92938	27.0498	0.108296	0.9941	0.733044	23.6226	27.3024	30.2379	28.9968	26.7906	26.433	25.7923	29.0352	29.2725	26.3205	24.4439	23.3887	2.02498	2.45093	2.4568	3.22826	1.40396	1.27162	0.224779	1.26316	1.48798	2.50911	0.29988	1.34484
Mir8110	0.141617	1	20.4069	8.60695	0.177752	0.273127	0.273127	9.604e-05	0.0102288	21.1098	7.51887	8.5483	0.193671	0.160318	1.20804	0.959189	0.352585	0	0	0.644816	0	0	0	0.321811	0.656767	0.278846	0	0	0	0	0	0.183308	0	0	0	0.45511	0.0548781	0.394348	0	0	0
Atp5sl	0.00536493	0.195964	23.4458	8.62366	13.3985	0.922531	0.0688535	0.00053361	0.0343063	23.9871	7.40018	7.40416	0.990194	13.3878	0.0739625	0.882852	0.504278	12.6833	13.1493	13.5589	13.7413	12.3299	12.3771	14.0226	14.588	14.8099	14.0301	13.204	12.4113	0.77483	0.23102	0.0928863	0.413057	0.596388	0.00621524	0.0133945	0.936216	0.559537	0.55116	0.216022	0.804724
Tspan5	6.37785e-05	0.00648011	25.8962	8.62532	25.4632	1.98015	0.0777651	0.00641601	0.171352	24.0385	8.87919	8.86497	1.94324	25.5356	0.0760992	0.999627	0.677832	24.2204	26.9198	28.3098	27.5471	24.9551	23.7718	24.0541	25.694	27.4137	26.2294	24.5879	24.4046	0.876989	1.01426	0.835654	1.89445	0.184445	0.0820314	0.226781	0.734661	1.18019	2.09263	2.7574	0.865437
Zbtb7c	1.20264e-05	0.00170092	24.2468	8.70822	12.8111	1.26274	0.098566	0.0127238	0.231438	24.4825	8.53345	8.36528	1.1209	12.78	0.0877078	0.992079	0.720067	12.4549	13.2417	15.0359	13.2351	12.8777	11.8175	11.8981	13.0758	13.8072	13.347	12.6385	10.7969	0.988295	0.74857	1.13335	1.22802	1.07804	1.18944	0.107444	0.171819	0.275106	0.176474	0.779345	1.40259
Ifit3b	6.45923e-06	0.0010572	26.7151	8.775	31.5669	11.6293	0.3684	2.916e-05	0.00387631	25.5695	8.90079	8.35445	10.9215	32.591	0.335107	0.999575	0.46717	19.8526	37.3559	43.6433	39.3692	29.1362	19.6533	25.1086	34.1398	41.1642	41.1316	38.2197	26.1605	0.79877	3.32714	1.22388	0.12777	0.956156	3.53885	12.5657	3.38705	3.85919	4.1749	12.1614	1.95635
Jdp2	0.0192749	0.479906	26.6667	8.77855	11.3896	1.3061	0.114675	0.00035721	0.0259896	24.406	7.75089	7.62195	1.26512	11.5012	0.109999	0.908883	0.543741	9.72398	11.7477	12.7854	10.9549	11.2408	9.1513	10.8409	12.4235	13.6399	12.1121	12.629	11.4008	0.550864	1.05103	0.855339	0.54899	0.586204	0.754268	1.51962	0.083488	0.946749	0.0468994	1.37053	0.087919
Slc46a3	1.19793e-07	5.04244e-05	26.7151	8.80341	8.98274	2.93297	0.326512	1e-08	4.91111e-06	25.5631	8.73404	8.19999	3.04087	9.19958	0.330545	0.999325	0.257209	6.54526	10.9352	13.1115	11.8924	7.65697	6.56816	6.98449	9.06868	10.9568	10.7025	9.42707	8.04126	0.5102	0.980441	0.763882	0.713819	0.785999	0.435308	0.190115	0.144457	0.495845	0.627411	0.602063	0.550575
Mpp2	6.1785e-07	0.000165499	24.1129	8.84611	15.1505	2.7077	0.178721	1.6e-07	6.42909e-05	24.3424	8.56451	8.44405	3.08033	15.3018	0.201305	0.997421	0.247093	14.4658	17.6883	19.756	17.5777	14.7627	12.2475	13.0512	14.503	17.4854	15.2601	13.1824	12.3693	0.321703	0.474433	2.01706	0.450918	0.379449	0.871337	0.573805	0.258049	0.956985	0.0517578	0.375893	0.446537
Cgrrf1	1.19625e-05	0.00170092	26.069	8.87368	49.155	4.862	0.0989117	2.304e-05	0.0031824	24.3729	8.56752	8.43645	5.52971	49.3466	0.112059	0.999307	0.463241	45.1316	52.0906	55.6111	52.0496	47.6247	44.799	45.4931	49.9318	55.4801	52.5936	47.0759	48.32	2.86091	1.40845	1.57628	2.83209	3.92669	0.940212	0.149548	4.87406	0.311842	0.380113	1.75228	0.431679
Fbxo3	2.28458e-05	0.0028854	26.2921	8.90283	32.2743	3.14824	0.0975464	0.00096721	0.0526162	24.8466	9.17577	8.86311	3.32427	32.7116	0.101624	0.998195	0.588912	29.4408	35.0461	36.9208	35.4997	32.1295	29.7246	29.346	33.6387	33.6547	33.4359	32.3946	30.4735	2.77098	2.04293	2.14186	0.13057	0.288822	1.28439	2.65026	1.72528	2.08607	1.42747	0.504951	0.716497
Gch1	0.00035251	0.0248288	28	8.90532	2.61188	0.275679	0.105548	0.015277	0.248023	27.0363	7.9512	7.05824	0.295329	2.60749	0.113262	0.340958	0.690952	2.8011	2.64268	2.6861	2.80058	2.50116	2.27699	2.24255	2.55499	3.01515	2.93244	2.8953	2.55007	0.56258	0.0107552	0.046967	0.166121	0.0174121	0.00587717	0.010223	0.100254	0.477771	0.195028	0.250527	0.196121
Plekho2	5.19871e-07	0.000145886	24.069	8.94756	28.7501	4.12288	0.143404	1.96e-06	0.000587336	24.3931	8.55078	8.41298	3.92729	28.4091	0.13824	0.995395	0.248172	25.9601	33.2234	35.8649	33.2426	27.2902	24.4667	25.8803	28.5732	30.9578	28.3969	27.3067	24.7377	0.534792	1.45454	0.205122	0.362225	1.89552	0.491301	1.18658	0.3572	0.867575	0.95018	1.018	1.69092
Igsf8	0.000105674	0.00988474	24.069	9.01294	64.9621	6.00092	0.0923758	0.00012769	0.0126829	23.8661	8.93473	8.98486	6.17344	64.6409	0.0955036	0.987987	0.510483	66.8276	66.7335	76.6046	69.067	66.4405	58.9444	60.294	65.5783	68.6848	67.3854	59.9225	54.9762	10.636	1.3009	6.88701	2.12187	2.13655	1.25722	0.315497	0.992846	2.29613	2.47893	0.15176	4.66985
P2ry1	0.00637254	0.223532	24.3836	9.03533	19.328	1.76701	0.0914222	0.00013225	0.0128596	25.5449	8.56998	8.05169	1.98903	19.2723	0.103206	0.95081	0.416543	19.1731	22.9297	23.0498	21.6677	19.4788	17.7978	16.7699	18.9979	19.3394	18.5877	17.9558	17.0504	1.27891	0.939908	1.02379	2.02755	1.5219	0.667703	0.337025	0.316548	0.143174	0.376289	0.689968	1.21578
Stk38	0.0101189	0.314399	24.069	9.07439	39.8177	1.52386	0.0382709	0.00018225	0.0158728	25.0184	8.84405	8.48403	1.85654	39.7472	0.0467088	0.93678	0.38098	40.1522	41.833	43.6729	42.3355	39.6126	38.8258	37.9227	39.6475	39.6789	39.233	38.5301	37.4649	2.06073	0.387601	0.171062	0.0290539	0.338554	0.20148	1.82297	0.380224	0.765001	0.897001	0.488184	0.896553
Nfic	0.124208	1	25.0137	9.10547	48.8463	3.91719	0.0801943	0.00015876	0.0148512	26.3097	9.42347	8.5962	3.09302	46.9628	0.0658612	0.941739	0.395424	50.4434	55.2357	58.0364	54.7082	52.0673	44.2424	44.2417	45.6939	47.533	47.097	47.7686	42.4148	0.729097	1.77058	3.55995	3.4804	0.861458	2.23831	1.61766	2.32038	2.88342	1.71221	1.89199	0.499612
Ppp1r13b	2.38777e-07	8.11796e-05	23.8117	9.12857	9.39599	1.23662	0.131612	0.000256	0.0208575	23.9306	9.2082	9.2349	1.25978	9.39827	0.134044	0.999868	0.534774	8.20418	9.95831	10.8044	10.4412	9.07293	8.47869	8.70577	9.72813	10.4174	10.0346	9.05722	7.97592	0.148139	0.0165386	0.0445721	0.589715	0.442041	0.523343	0.577429	0.417739	1.11678	0.212849	0.741855	1.26509
Tsc22d3	2.38348e-06	0.000458018	26.5235	9.12959	27.2819	5.13864	0.188354	1.96e-06	0.000587336	24.9419	8.92027	8.58339	5.45827	27.6725	0.197245	0.999316	0.377065	22.858	26.7568	33.5044	30.9012	25.0026	21.7701	23.5564	28.9551	32.6361	32.2632	29.0785	27.1442	0.84594	0.274823	1.42252	2.8004	0.142867	1.19618	0.495239	0.626148	0.710533	2.0444	4.42039	3.14609
Slirp	0.000274881	0.0204186	24.1129	9.19128	55.6699	3.93277	0.0706446	4e-06	0.000841905	24.7145	8.48083	8.23566	3.87305	55.1237	0.070261	0.992579	0.371479	51.7996	60.9035	60.3807	60.1834	53.212	53.2233	52.4351	55.1372	58.8204	57.4347	52.9497	53.2464	2.35905	1.53061	2.08628	0.960326	1.59557	1.63992	1.53592	0.787157	0.786972	0.47118	0.0622876	1.73085
Wee1	7.14364e-08	3.32348e-05	23.6872	9.23192	24.2945	7.00572	0.288367	4e-08	1.81333e-05	23.6129	9.06773	9.21637	6.79664	24.2626	0.280129	0.997808	0.140146	17.0582	30.4394	36.1816	31.3237	22.9608	18.3735	19.3418	24.6217	27.7427	24.8467	20.2392	17.8655	0.0124958	0.382066	2.08627	1.54285	0.0165208	0.822173	0.757823	1.01661	1.31731	0.321288	1.1813	0.83882
Slc4a11	3.22097e-09	2.7116e-06	23.7284	9.23422	6.6824	1.4839	0.222061	1e-06	0.000346667	23.716	9.03877	9.147	1.49703	6.74094	0.222081	0.999905	0.352178	5.65577	7.09691	8.7226	8.05162	6.14813	5.30956	5.61575	7.23225	7.74744	7.27517	6.03489	5.25744	0.0886291	0.382596	0.0699481	0.357996	0.591852	0.800987	0.235301	0.758814	0.232637	0.736174	0.421504	0.227024
Per2	2.42053e-09	2.25224e-06	23.6462	9.25361	9.75408	4.22273	0.43292	1e-08	4.91111e-06	23.4571	8.67825	8.87912	4.38673	9.94893	0.440925	0.999743	0.300937	6.40494	11.9219	16.5035	12.8425	8.32196	5.61213	6.9192	11.4352	12.6872	10.4609	7.68533	5.74602	0.749723	0.970339	0.0641382	1.53284	0.385509	1.62721	1.34011	1.87131	2.20367	0.260815	0.59945	0.833543
Fbxl16	0.000128594	0.0115402	28	9.26836	25.7441	1.9101	0.0741957	0.00078961	0.0465343	27.3992	10.3517	9.06745	2.01613	25.6647	0.0785566	0.98941	0.581597	26.4284	26.0945	27.73	28.5248	25.7982	24.5885	23.7647	24.3041	25.7446	27.3485	27.227	25.363	0.23271	1.41836	1.98927	0.00738618	1.26072	0.568331	0.916111	0.223847	1.56599	0.383842	0.685568	0.881407
3110082J24Rik	0.00766068	0.256502	23.3288	9.28753	8.31161	1.35917	0.163527	0.00061009	0.0381145	23.0162	8.00606	8.34828	1.44739	8.23587	0.175742	0.876087	0.430269	5.85117	8.74229	11.0395	7.75665	8.18957	7.78576	7.73998	9.57579	9.63677	8.08586	8.4894	6.60669	0.0910188	0.759559	0.316318	0.897401	0.0156062	0.40163	0.931193	1.59946	1.73211	0.228171	0.0237947	0.128467
Prss57	0.00473858	0.179003	23.4458	9.34922	4.90559	0.456921	0.0931429	9.216e-05	0.0099353	23.382	9.16985	9.41222	0.482176	4.85913	0.0992308	0.973484	0.495028	4.64701	5.46287	5.4776	5.83236	4.7503	4.54567	4.51664	5.00614	5.09687	4.69477	4.53301	4.28139	0.181618	0.0632257	0.885412	0.35199	0.00436488	0.428977	0.0210813	0.165914	0.507606	0.0711726	0.141094	0.00268543
Ank	0.000906762	0.051053	26.5235	9.39439	218.678	12.0854	0.0552657	0.00077284	0.0458517	25.2333	9.34224	8.88564	11.4946	220.637	0.0520974	0.945037	0.580954	214.496	225.073	241.606	238.492	213.529	209.078	212	213.185	223.148	224.743	213.288	215.992	7.96682	5.05339	11.7691	9.27757	5.66035	1.33967	7.84359	2.33451	1.73462	0.95204	17.9311	1.80142
Gpr137c	7.95616e-05	0.00780664	23.6462	9.40602	3.25273	0.860019	0.264399	0.00013456	0.0128596	23.6295	8.61919	8.75434	0.768288	3.10886	0.247129	0.996033	0.512431	2.48829	3.92658	4.94209	3.94497	2.9841	2.29889	2.70764	3.23852	3.74479	3.31547	2.68776	2.68164	0.279414	0.0465736	0.423658	0.199879	0.256582	0.786977	0.253654	0.974905	0.526309	0.323884	0.311508	0.358757
Palm	0.000502443	0.0331551	23.4458	9.41734	99.806	9.29007	0.0930813	0.0886253	0.522124	22.7592	9.66892	10.1961	9.63607	99.7189	0.0966323	0.99785	0.887335	96.3976	96.9759	113.795	108.368	100.47	89.5436	96.7361	101.783	107.996	102.632	96.2992	86.6933	17.4044	6.88137	10.0649	5.38871	4.54685	3.67777	4.08537	4.97403	7.92564	6.61784	8.79464	2.55452
Tspan15	0.000365843	0.0254635	23.4853	9.43922	243.781	12.9495	0.0531194	0.0346704	0.353911	23.2844	8.06297	8.31077	12.6527	245.036	0.0516361	0.99976	0.790334	227.858	247.26	253.37	248.805	232.032	230.802	241.593	255.337	260.846	254.579	239.27	236.628	1.55458	7.40213	15.7313	16.9077	12.9178	13.9991	2.26781	5.23739	6.64348	1.35608	16.2696	3.06311
Vamp2	0.000169502	0.0143379	23.0649	9.44128	60.284	4.69444	0.0778721	0.00127449	0.06438	22.4097	10.1072	10.8245	5.16825	60.6413	0.0852265	0.80411	0.526954	52.6692	60.239	65.2435	67.2216	59.5399	56.0986	63.27	61.9103	62.3336	61.6817	59.3813	53.1954	8.59293	1.37207	3.05558	0.482168	3.21504	1.25912	4.77924	1.38493	2.44853	0.661712	0.602945	0.265959
Haus8	8.46951e-07	0.000202341	24.3377	9.44468	23.567	3.25978	0.13832	1e-08	4.91111e-06	25.0814	9.59698	9.18321	3.44591	23.6632	0.145624	0.998887	0.278647	22.3189	25.5484	28.1882	27.3036	24.3029	20.4104	20.8747	22.9009	24.2463	25.9625	22.388	19.5522	0.427338	0.629588	0.230162	0.667192	0.89412	0.140944	1.31899	1.76595	0.636954	0.150535	1.76407	0.536354
Cyp2s1	0.000654413	0.0400772	26.9126	9.44668	0.724237	0.171198	0.171198	0.00094249	0.0515889	25.8242	9.66011	8.97774	0.169017	0.736839	0.229381	0.973211	0.588303	0.691875	0.829944	0.925867	0.796611	0.855411	0.600305	0.577468	0.648451	0.757922	0.942318	0.803569	0.514451	0.0731887	0.00616486	0.0349595	0.138529	0.150982	0.032133	0.105075	0.10203	0.00696058	0.0823811	0.124027	0.122737
Fam120b	0.000254311	0.0192136	24.069	9.46248	27.767	1.81753	0.0654564	0.0889232	0.523182	24.595	9.40037	9.17296	1.90974	27.7388	0.0688474	0.998921	0.887612	26.2075	29.7038	29.6488	29.9407	27.6547	26.4782	25.9819	28.2988	28.6572	28.5792	27.1486	25.695	1.57399	1.31242	1.97956	1.42558	0.200767	0.965106	2.51612	1.16236	1.59829	0.900804	0.636106	1.99951
Tmem57	9.17814e-09	6.49042e-06	24.069	9.46865	22.4286	4.4963	0.200472	1e-08	4.91111e-06	24.359	8.69674	8.56855	4.24871	22.689	0.187259	0.99947	0.161535	17.6064	24.3313	29.7238	25.6815	19.6833	18.7176	19.8216	23.2433	25.3944	24.8078	21.685	19.1961	0.409537	0.601626	0.246723	1.13806	1.06511	1.38239	0.606141	0.0758881	0.100768	0.298907	0.495012	0.614096
Arhgef26	3.19028e-06	0.000606461	23.3288	9.49419	84.9965	10.3418	0.121673	5.041e-05	0.00578733	23.1811	9.44852	9.78231	9.90825	85.4781	0.115916	0.996147	0.481218	68.8023	90.1113	101.268	94.8578	83.1785	78.9455	79.9046	87.8929	90.547	86.9477	80.3081	75.8704	4.89452	4.56523	3.87234	3.04264	1.41173	5.38429	7.51744	2.35993	7.76121	4.60397	0.444499	5.33221
Mthfd1l	2.01094e-07	7.72856e-05	23.8962	9.52224	3.16174	1.04395	0.330182	9e-06	0.00162367	24.0457	9.43357	9.41565	1.07909	3.13317	0.344409	0.988656	0.207965	2.27105	3.97154	5.23401	4.3327	3.21612	2.15202	2.45475	2.96627	3.51404	3.08989	2.70219	2.0632	0.441679	0.256827	0.112285	0.0878162	0.299406	0.108259	0.163206	0.172659	0.275472	0.0728318	0.131855	0.28345
Ddr1	5.05891e-05	0.00543696	23.7699	9.54355	614.102	42.0744	0.0685138	2.116e-05	0.00294574	23.1911	10.2013	10.5571	45.9731	614.085	0.0748643	0.983869	0.461035	603.742	628.728	687.581	657.327	639.344	569.716	587.664	616.504	634.378	616.167	599.593	539.563	2.78728	1.81583	55.7804	43.4412	19.9716	7.71236	12.8917	2.69395	8.34169	1.69558	31.0643	29.7595
E130012A19Rik	0.000230272	0.0180132	23.8538	9.54752	2.86023	0.620446	0.216921	0.0198528	0.281474	24.5755	8.27534	8.08155	0.61472	2.87577	0.213758	0.992592	0.747635	2.00696	3.01361	3.75158	2.79245	2.60969	2.41108	2.50785	2.97002	3.72343	3.37242	2.60216	2.59024	0.432819	0.269122	0.846413	0.0999988	0.607777	0.501916	0.341585	0.159216	0.685283	0.311666	0.327019	0.178616
Gm9748	1.84257e-05	0.00241295	23.2903	9.57574	3.41665	1.24832	0.365364	0.00189225	0.0841978	22.8885	9.23238	9.68071	1.32184	3.35599	0.393875	0.996366	0.616589	1.85948	3.04472	4.87297	4.1091	2.76478	2.60311	3.17985	3.75226	5.20015	3.86624	3.20904	2.1739	0.0361053	0.300443	1.6563	0.340808	0.476705	0.383794	0.099342	0.542854	1.00325	1.17745	0.387157	1.12106
Kcnh1	5.50155e-06	0.000926304	23.8117	9.58421	0.958177	0.524403	0.524403	7.29e-06	0.00137114	24.4459	9.73615	9.55855	0.399329	0.845669	0.472205	0.989317	0.294745	0.625274	1.19462	1.97898	1.76652	0.815386	0.583799	0.514679	0.747727	1.14256	1.00863	0.596218	0.497116	0.183228	0.230091	0.187536	0.126312	0.00997762	0.12513	0.137735	0.0624786	0.305903	0.212198	0.0179385	0.135455
Snw1	1.45126e-05	0.00200443	23.8962	9.5897	129.962	12.6724	0.0975089	3.61e-06	0.00078796	24.4565	9.32305	9.14902	13.073	128.89	0.101428	0.994478	0.406729	115.247	142.416	148.12	144.098	127.559	121.854	117.504	127.71	140.067	132.327	122.611	122.717	13.9493	0.377579	5.71618	0.637388	2.43689	3.79621	6.72634	3.80997	5.12811	2.99776	0.864625	7.56202
Lrtm2	2.69859e-10	5.96354e-07	24.0253	9.6206	22.9664	4.27373	0.186086	0	0	24.0086	8.90015	8.89696	4.74304	23.1466	0.204913	0.999692	0.217692	19.9247	24.8722	29.0414	26.3724	22.05	17.9457	19.7775	23.408	27.2667	23.7177	22.2137	19.6643	0.431233	0.780861	0.237531	0.901781	1.40853	2.22127	0.160695	0.741204	1.07382	0.540136	0.228987	0.195271
Mapk10	0.0810846	1	24.1129	9.71011	20.5378	1.30515	0.0635488	0.00017161	0.0153262	25.3189	10.0816	9.55646	1.16178	20.4252	0.0568799	0.93868	0.463607	19.5137	22.1539	22.9349	23.2849	20.8321	19.9118	19.2991	19.6384	20.5105	20.1331	19.8731	18.9799	0.112325	1.16074	0.400778	0.0611253	0.121026	1.36757	0.0512233	0.414377	1.12449	0.659318	0.954546	1.57787
Ifit3	8.06557e-05	0.00780777	26.963	9.73466	90.4334	25.1167	0.277737	0.00033856	0.0251502	26.2886	8.74256	7.98147	25.2009	91.3292	0.275935	0.997878	0.544367	56.9948	103.27	114.866	103.485	81.4352	62.8602	77.1391	94.7957	114.532	114.406	115.335	82.7366	3.79388	5.03132	3.85193	4.95432	4.24697	11.5973	28.0766	17.2637	2.87115	14.7468	33.3712	6.79379
Idh2	0.000311061	0.0223547	22.8483	9.7518	521.838	43.5805	0.0835135	0.00030625	0.0236441	22.1693	10.9763	11.8827	43.6603	517.323	0.0843967	0.918769	0.480698	449.636	500.458	571.544	557.481	542.151	515.169	521.343	546.449	551.705	547.063	493.506	453.593	3.77004	34.1833	4.09956	40.102	5.73637	8.62	14.4755	33.8524	12.5622	22.1484	12.8882	37.317
Nr4a3	0.000106683	0.00992655	22.9917	9.82817	19.5949	2.16915	0.1107	0.00064009	0.0394313	22.5051	9.27932	9.89572	1.93809	19.8705	0.097536	0.995371	0.574214	15.6935	20.0798	22.5373	21.2067	18.8129	17.9845	18.6925	21.4054	20.6296	20.5923	18.6924	18.2102	0.133552	1.1368	1.46543	0.929397	0.662786	1.54046	0.854896	0.972414	2.27801	1.08777	1.52415	0.351599
Pcdh8	1.48896e-07	6.12169e-05	23.139	9.8546	4.64214	1.6511	0.355677	1e-08	4.91111e-06	22.759	9.22739	9.73054	1.48285	4.76209	0.311387	0.999378	0.293105	2.36876	4.11522	6.99553	5.64306	3.84126	3.23282	3.99515	5.44212	6.2368	5.44001	4.13972	3.64381	0.296251	0.346763	1.50063	0.0506502	0.280192	0.0534156	0.111014	0.0390568	0.55778	1.02422	0.0695295	0.421436
Pawr	2.36501e-07	8.11796e-05	23.939	9.91476	181.725	21.7009	0.119416	2.809e-05	0.00376236	23.8088	9.96322	10.0432	16.5274	183.153	0.0902382	0.979971	0.289872	143.053	182.38	219.572	196.764	178.637	169.801	170.545	187.199	189.367	196.986	181.869	168.579	12.4896	2.566	16.8453	5.72889	3.35223	1.30017	0.173078	2.77419	5.56772	0.63642	2.28226	11.9825
Extl1	0.000172048	0.0144153	23.4458	9.92929	11.054	1.5835	0.143252	0.00013225	0.0128596	23.2294	10.422	10.7677	1.65743	11.109	0.149198	0.951036	0.382538	9.91981	11.1654	13.8928	13.8089	11.3618	9.4291	10.4532	11.0288	11.1614	10.8405	10.6465	8.76531	0.781767	0.665361	1.0282	0.584844	0.496109	0.117427	0.0179776	0.475472	0.209433	0.532073	1.41033	0.670548
1190002N15Rik	0.00624645	0.219545	22.5723	9.94381	48.6158	2.89751	0.0596002	0.00085264	0.0480085	22.9142	9.37091	9.81497	2.32994	49.1926	0.0473636	0.841625	0.46866	41.1885	49.8345	54.3758	51.0401	47.853	48.042	47.0544	50.7043	49.0544	48.1958	48.4677	46.7712	2.67741	0.231421	1.87703	2.23355	0.405646	1.76319	1.4282	0.445443	4.10321	0.401624	0.842603	1.14345
Ak4	4.96372e-08	2.4376e-05	23.6056	10.0041	27.9104	6.04297	0.216513	1e-08	4.91111e-06	23.5354	9.99523	10.1925	5.05451	28.1617	0.179482	0.998026	0.312819	17.6145	28.5377	37.2319	33.6236	26.9974	24.243	24.5782	28.1113	32.1351	30.0929	26.6907	24.554	1.59823	1.65161	0.908917	1.83829	0.143616	1.9697	2.19498	1.19927	3.03059	2.14217	1.96793	0.518966
Mob3b	2.36424e-07	8.11796e-05	23.6056	10.0108	21.3668	4.33248	0.202767	3.61e-06	0.00078796	23.1685	9.7956	10.1472	3.94458	21.6017	0.182605	0.998996	0.407364	14.0086	21.6756	25.0102	24.6239	20.3103	17.6874	19.1329	23.2113	25.9267	24.0364	21.6714	18.7721	2.17616	0.538554	1.09928	4.40737	0.373752	0.191677	1.44996	0.450176	0.5329	1.61203	1.88842	2.46202
Wnt5b	0.00331177	0.139402	23.2142	10.0237	15.0104	2.47486	0.164877	0.00038416	0.0269522	23.0985	10.4174	10.824	3.01764	15.7486	0.191614	0.906325	0.395759	12.7279	16.6406	19.7647	19.682	16.2413	13.2974	13.9279	14.1634	14.5969	14.7488	12.2713	11.4475	1.33818	1.62376	1.10923	0.64396	0.834699	1.47069	1.06735	0.507941	1.09155	0.324423	1.90742	0.810961
Sumo1	0.000462997	0.031005	26.9126	10.0422	126.964	11.1592	0.0878922	0.016874	0.260325	25.9283	9.39894	8.69992	10.8833	127.732	0.0852041	0.997956	0.736854	112.004	134.778	139.442	132.773	126.708	119.181	114.56	127.841	137.487	137.875	131.136	127.776	6.14542	0.619448	7.72493	8.91424	11.4574	11.8062	7.01178	9.74927	6.99235	2.0498	2.76676	5.20636
Zbtb14	2.90456e-07	9.47267e-05	24.1572	10.0692	15.4762	1.94854	0.125905	0.00010609	0.0109688	24.2415	9.73263	9.63567	1.91671	15.4864	0.123768	0.999676	0.502738	12.97	16.3649	17.9432	17.2619	15.3767	13.5993	13.8657	15.7398	16.6377	16.7242	15.1725	14.6226	1.95769	1.17778	0.486718	0.095429	0.67267	1.29447	1.61338	0.540672	1.108	0.0271465	0.201518	0.142632
Rgcc	0.0187056	0.473448	23.8538	10.0902	10.1705	1.75929	0.172981	0.000841	0.0478099	23.3535	9.91339	10.1878	1.31212	10.5947	0.123847	0.84353	0.503509	5.38333	9.67786	12.3309	11.1719	9.40656	9.6238	9.71018	11.1034	11.666	11.4064	11.0837	9.61025	0.976633	0.163738	1.65618	0.63535	0.320353	0.282552	1.84855	0.0964787	0.835927	1.17095	0.658002	2.24096
Gm13594	0.000150787	0.0131318	26.6667	10.159	7.20865	1.87849	0.260588	0.00741321	0.186437	25.7707	10.479	9.75897	1.64504	7.00312	0.2349	0.998225	0.685494	6.49548	6.63485	10.1189	8.56235	8.11923	5.85515	5.74365	6.26631	7.58264	9.44838	7.76066	6.31806	0.0715145	1.01356	4.21402	0.111027	0.565915	1.54109	0.146853	1.64545	0.848491	0.129793	0.402215	1.10315
Il34	1.31522e-06	0.000280141	26.5235	10.3609	2.81474	0.757496	0.269118	0.00622521	0.167777	25.2104	10.5021	9.99789	0.772916	2.84596	0.271584	0.999969	0.676495	2.1659	2.75533	3.48429	3.62889	2.88914	2.42138	2.00616	2.63359	3.33094	3.58118	3.19699	2.6256	0.524191	0.602577	0.101273	0.638537	0.181221	0.429937	0.179212	0.173067	0.52357	0.667775	0.299426	0.15535
Mettl7a1	1.70945e-05	0.00228028	22.8838	10.3956	126.199	19.8874	0.157588	1.44e-06	0.000480362	21.7513	10.5387	11.6282	17.8731	129.116	0.138427	0.99721	0.362524	86.381	112.954	137.404	140.715	127.166	107.29	121.377	140.034	148.756	140.359	126.153	117.581	10.2441	11.4516	6.44453	0.437727	7.90281	7.41309	9.85228	2.0698	5.72671	6.56179	1.22289	7.69593
Dpm1	0.0111671	0.336984	24.069	10.4318	32.5883	2.74508	0.084235	0.00080656	0.0470626	23.9516	10.0435	10.0637	2.61043	33.0144	0.0790695	0.958431	0.582166	26.9495	34.2477	36.4662	36.602	33.5988	30.0939	31.1352	32.6228	32.9517	33.2486	31.9549	32.1417	2.27629	1.48742	2.53894	3.07916	2.3864	0.679589	1.97316	0.529345	0.0733342	0.757267	1.29391	1.30566
Ccdc183	2.04986e-06	0.000406657	23.5652	10.4501	0.88974	0.37312	0.37312	1.024e-05	0.00181043	22.9232	10.7209	11.2245	0.368129	0.909175	0.404904	0.999923	0.433907	0.542271	0.832445	1.18592	1.20281	0.987957	0.583438	0.611145	0.793508	1.39978	1.07435	0.875713	0.54222	0.0922946	0.00618344	0.00851301	0.167757	0.218799	0.130731	0.247945	0.012038	0.156634	0.0324938	0.384526	0.0439135
Pmepa1	0.000696523	0.0414784	26.6667	10.5013	49.163	3.68608	0.0749768	0.0613553	0.451596	25.749	9.92954	9.25506	4.04019	49.4257	0.0817427	0.994449	0.844933	44.6676	49.965	53.9632	50.2821	50.4342	48.3605	45.5163	47.3719	53.1106	52.5088	51.9869	47.4277	1.2104	3.66084	4.4734	3.4756	1.30229	0.815403	3.23904	2.59021	1.14093	3.01033	2.24253	3.26085
4930570G19Rik	0.00051809	0.0336739	27.2207	10.5203	1.22263	0.235848	0.192902	0.0137828	0.238201	26.7316	10.6751	9.58421	0.227341	1.23348	0.184309	0.993549	0.725047	0.98758	1.24343	1.53666	1.32629	1.43712	1.04892	1.04103	1.04564	1.29113	1.47838	1.30814	1.27577	0.172532	0.260252	0.0455665	0.10466	0.101731	0.0835619	0.224297	0.148116	0.169558	0.0585544	0.0512032	0.187776
Fads2	0.000354054	0.0248385	28	10.574	433.985	39.5624	0.0911607	0.00070756	0.0425499	27.7489	10.9598	9.47913	34.2421	436.578	0.078433	0.860904	0.422684	426.754	456.181	484.823	480.059	458.372	400.116	392.278	403.229	428.156	430.917	457.808	459.597	14.1734	5.52978	4.39732	17.9306	28.5242	0.367231	14.6535	19.97	6.4223	24.4814	12.5964	7.90614
St3gal4	0.0022502	0.102794	24.5235	10.854	13.4326	1.14834	0.0854892	0.00085264	0.0480085	25.0579	11.4275	10.9451	0.978667	13.3906	0.073086	0.982993	0.583875	13.2621	13.9704	13.8753	15.3458	13.7832	13.1132	11.3181	12.9522	13.8232	14.2783	13.5833	12.5414	0.352289	0.581913	0.116672	0.111694	1.08808	0.0351344	0.485895	0.776169	0.924879	0.892213	1.53674	0.024963
Lix1	5.38274e-06	0.000915014	28	10.9755	40.9107	5.35082	0.130793	3.721e-05	0.00463291	27.2184	10.4361	9.20205	5.10129	41.2598	0.123638	0.990164	0.47628	35.4302	44.2651	47.5122	46.5662	42.2023	38.979	34.8185	38.6394	40.2768	43.9187	43.6831	43.2918	5.19589	4.61779	3.02808	2.56076	0.0109965	3.5067	0.911884	1.48547	0.392601	0.38579	0.47265	0.621076
Zfp467	0.00194531	0.0924493	20	11.0946	7.66472	0.728917	0.0951003	0.00063504	0.039257	20.7836	10.9182	12.6079	0.7405	7.82828	0.0945929	0.932068	0.573435	6.5479	6.96657	7.49617	8.54307	7.28911	7.2549	7.61334	8.28858	8.63291	7.87589	7.34948	7.19385	0.338499	0.255536	0.00693046	0.687799	0.31581	0.204087	0.301702	0.40895	0.554809	0.359855	0.790214	0.161015
Ifi44l	0.000571367	0.0360477	20.4069	11.1083	0.59714	0.16577	0.16577	0.0109202	0.217276	21.2323	9.92078	11.214	0.166481	0.603548	0.275837	0.996211	0.709402	0.42811	0.585997	0.836132	0.810552	0.593497	0.465812	0.474512	0.610083	0.689393	0.556841	0.378334	0.500371	0.068762	0.280104	0.10158	0.108679	0.00726244	0.0804486	0.0989207	0.246718	0.0297738	0.141261	0.00165556	0.0565316
Nppc	0.000162403	0.0140013	23.139	11.1122	11.8276	1.71438	0.144947	0.00017424	0.0153262	22.358	10.5739	11.3504	2.01793	11.5101	0.175318	0.953747	0.522989	9.27987	12.1847	14.1156	13.5452	12.6263	11.2739	11.8714	11.5189	13.2821	12.5279	10.1808	9.07749	0.898618	0.799611	0.632218	1.42878	0.484892	0.475436	1.45208	0.631482	1.38322	0.108818	1.11558	0.728243
Neu2	9.40138e-07	0.000215853	26.1572	11.1353	3.3105	0.814721	0.246102	4e-08	1.81333e-05	24.6745	11.0231	10.7218	0.84718	3.35487	0.252523	0.997679	0.269296	2.5692	2.99132	4.30508	3.72826	3.59352	3.12532	2.65452	2.72069	4.01411	4.47608	3.60163	2.78735	0.329383	0.264407	0.220211	0.0113466	0.171928	0.063487	0.225494	0.0107018	0.137862	0.0431542	0.599283	0.0709225
Chrnb1	0.955401	1	28	11.16	13.9683	1.0514	0.0752706	0.00081796	0.0472599	26.5684	12.785	11.549	0.66919	14.0794	0.0475296	0.848938	0.501888	14.1525	14.9145	15.6348	16.0443	15.19	14.1943	12.9103	12.6004	13.7621	13.2255	13.6926	13.1042	0.182324	0.541182	0.124318	0.0844712	0.598095	1.05699	0.670382	1.21951	0.772682	0.273001	0.0973411	1.09981
Mxi1	0.0187066	0.473448	22.6742	11.1665	43.6165	4.29489	0.0984694	0.00081796	0.0472599	22.2213	10.4283	11.263	3.24307	44.9328	0.0721759	0.848562	0.553572	31.5964	39.4048	48.2266	46.5514	42.5472	43.0687	42.8945	47.0831	48.2163	46.593	43.2616	42.18	2.72726	1.82331	0.295724	1.38893	1.83498	4.1194	4.13843	2.93555	3.55704	2.89081	2.37395	2.81484
Smarca2	0.043979	0.800726	23.982	11.1746	67.3692	10.5037	0.155912	3.025e-05	0.00399119	25.31	11.4305	10.8389	7.62419	66.4423	0.114749	0.980385	0.467608	61.2336	70.3461	86.4659	87.1125	74.6564	61.176	58.4564	62.5071	63.0255	65.9498	64.1589	55.0018	7.67432	5.33556	3.88452	0.0380601	2.24885	5.31673	7.03051	6.34573	8.3667	3.75895	1.67826	6.42565
Dgat2	0.0325059	0.668408	24.2468	11.2335	15.434	1.48804	0.0964128	0.00055225	0.035376	25.3172	8.68199	8.2303	1.6051	15.56	0.103155	0.996817	0.567628	13.172	14.1847	16.1355	15.0543	14.4453	13.8715	14.4635	15.9402	17.8291	19.0206	16.6442	15.0223	2.03987	0.236468	0.778488	1.42503	0.709526	1.68174	0.569179	0.474413	0.540018	0.621299	1.83273	0.733989
Plcl1	0.00017763	0.0146744	24.1572	11.2425	12.0558	1.34701	0.111731	0.00017424	0.0153262	23.8599	10.0095	10.0683	1.6117	12.2362	0.131716	0.996793	0.520181	9.94336	12.2309	13.7783	13.958	12.1818	10.8165	10.7021	12.4029	12.7754	12.2146	12.3177	11.7682	0.77693	0.776421	0.062692	0.995994	0.122064	0.482337	0.65803	0.470118	1.08054	0.621912	1.19852	0.107251
Ankrd6	0.000607261	0.0376693	23.4458	11.31	15.5385	1.6931	0.108962	0.0154505	0.249411	22.6813	10.5884	11.2041	1.60018	15.7628	0.101516	0.996469	0.731692	12.4123	14.3601	17.365	17.0713	15.203	14.3361	14.9657	15.9103	17.2948	17.1168	15.5105	14.8475	1.27744	0.987895	0.0435393	1.1764	0.0253859	1.74742	2.49783	1.41305	2.24531	0.937679	0.0457942	0.819274
Defb1	8.29031e-07	0.000200773	24.3836	11.3375	5.93007	2.3291	0.392761	8.281e-05	0.00909367	24.6038	10.6704	10.4085	2.35031	5.80303	0.405014	0.999118	0.492836	3.88534	4.81818	9.22048	8.52377	6.2995	3.90268	3.52609	5.12268	7.57196	7.00162	6.37297	5.5011	1.15452	0.592732	2.4405	2.53742	0.585091	0.0438613	0.430325	0.633958	0.706754	1.40394	0.114996	0.325487
Ivd	0.111479	1	23.6872	11.394	61.402	7.46535	0.121582	8.281e-05	0.00909367	25.0304	12.0384	11.5428	4.63539	60.3602	0.0767956	0.963394	0.23025	58.1722	64.5119	72.6542	77.2782	68.4941	58.5936	55.6133	54.8918	58.7494	60.4002	56.716	51.2057	0.192478	2.48076	1.38241	2.20604	0.361656	1.33448	2.9451	1.0224	4.55579	2.25293	0.391669	2.38618
Syt1	0.000707495	0.0418321	26.7639	11.4364	2.37912	0.403244	0.169493	0.00015129	0.0143038	26.326	11.5467	10.5265	0.293457	2.37085	0.123777	0.9447	0.344029	2.05513	2.51357	2.88625	3.19137	2.6163	2.14585	2.1785	2.20714	2.25381	2.34854	2.52227	2.1188	0.15263	0.00753127	0.164232	0.163835	0.105629	0.190951	0.0286306	0.100727	0.0967939	0.0259032	0.0821695	0.303203
1500009C09Rik	0.000223394	0.0175528	24.1572	11.4373	85.7059	8.06468	0.0940971	0.0265364	0.312678	24.0806	10.2157	10.1815	8.55024	86.665	0.0986585	0.999279	0.770079	71.5938	82.2947	93.6074	91.3214	83.9123	79.772	80.9043	85.1551	94.3778	95.4941	88.9386	83.9756	5.50682	0.257009	4.98933	4.7043	8.0719	7.08104	5.90671	6.81841	5.19236	7.80861	5.23481	3.79027
Sfrp5	2.46658e-05	0.00307089	24.2018	11.4572	1.33617	0.824224	0.616855	3.61e-06	0.00078796	24.989	11.2295	10.7851	0.650422	1.23777	0.525478	0.99338	0.267395	0.430279	1.45847	2.75829	2.56544	1.68478	0.94838	0.724651	0.832298	1.38066	1.49558	1.07307	0.797369	0.120244	0.188868	0.292713	0.246549	0.213156	0.229351	0.136917	0.0722125	0.0607062	0.191035	0.469058	0.0797995
Ogfrl1	0.0262181	0.577942	23.8962	11.4764	17.5304	1.72499	0.0984002	0.00022201	0.0186025	22.7335	10.4454	11.0274	1.40672	18.1193	0.0776366	0.930631	0.530432	12.2204	15.9794	18.9568	19.3303	16.3652	16.6072	17.2383	18.599	19.5198	19.3833	18.5209	18.0159	1.78951	0.797561	0.517677	2.06388	1.08969	0.210617	0.719827	0.734881	0.396643	1.63275	1.30054	2.03038
Capn1	0.000693268	0.0414784	23.6462	11.4799	48.675	2.56573	0.0527114	0.00368449	0.12723	23.1784	11.6167	12.0285	2.48517	49.0827	0.0506324	0.965212	0.649743	46.5709	48.0437	50.4143	51.581	50.2626	45.0496	48.2732	49.1718	49.4246	51.4444	49.4704	45.2146	1.44572	0.0264686	4.03435	3.00103	0.155564	1.45955	1.42333	0.632892	1.30654	0.587951	2.31922	0.74603
Rpe65	0.0116183	0.346959	24.0253	11.5612	0.360748	0.19746	0.19746	0.00019881	0.0168988	24.8495	12.0825	11.6694	0.157486	0.371448	0.423979	0.93265	0.384579	0.219631	0.480064	0.489932	0.751707	0.48937	0.295472	0.249938	0.158931	0.288086	0.5195	0.268188	0.129988	0.0628645	0.00356593	0.179651	0.0385904	0.0775128	0.0441169	0.0691139	0.133758	0.0378332	0.0982811	0.0709619	0.0299018
Lrrn4cl	0.179035	1	24.3836	11.6458	4.01959	0.521346	0.129701	9e-06	0.00162367	24.6891	8.80585	8.56005	0.601444	3.92306	0.15331	0.988627	0.263127	2.82959	3.37027	4.08641	4.13901	3.29425	3.32284	3.49733	4.27842	5.25049	5.29949	4.44332	4.62184	0.427951	0.0576782	0.267782	0.399559	0.148843	0.306983	0.112916	0.340118	0.139262	0.00253085	0.0891366	0.208027
Mybph	0.0201584	0.492239	24.2018	11.6552	44.8167	4.72468	0.105422	1.96e-06	0.000587336	24.2659	9.66204	9.55616	4.21469	44.844	0.0939855	0.995457	0.29535	32.3953	39.8438	46.1997	44.6042	42.3464	40.7272	41.647	46.3839	54.1399	53.7	50.6029	46.9243	0.59107	0.663438	1.945	2.5149	2.59693	1.42668	1.99551	2.83172	1.61337	1.43511	1.64894	2.6328
Mapre2	2.97256e-08	1.59248e-05	23.8962	11.6591	28.2485	2.67474	0.094686	2.56e-06	0.000620011	23.6883	10.656	10.7962	2.74361	28.3437	0.0967979	0.999926	0.394171	24.9466	27.727	31.2984	31.5087	28.3719	26.643	25.9623	27.9152	30.4691	29.632	28.6232	26.491	0.0197536	0.807436	0.965085	0.313285	0.0839889	0.343197	1.26755	1.59967	1.92933	1.05714	0.723387	0.881449
Adora1	0.00572783	0.205343	24.2468	11.666	62.8811	6.55746	0.104284	9e-08	3.78857e-05	24.3289	9.9666	9.83188	7.07593	63.2577	0.111859	0.997553	0.155661	47.0356	56.2437	64.588	63.3668	61.1631	55.3891	58.8277	64.9299	74.262	74.3757	71.4692	65.3283	1.78287	1.89718	0.387195	1.17865	0.188271	2.19571	2.4561	1.25069	2.05657	1.15027	0.0246031	0.532751
Cdh19	9.16766e-08	4.15577e-05	24.1572	11.7275	2.72373	1.51256	0.555328	1e-08	4.91111e-06	24.7383	11.1828	10.849	1.48432	2.71001	0.547718	0.998331	0.227099	0.984749	2.74283	4.65529	5.10056	3.34606	1.87395	1.5797	1.99051	2.87303	3.3915	2.39659	1.93894	0.661536	0.235802	0.530785	0.0316264	0.0157961	0.388356	0.337559	0.0860395	0.622958	0.20183	0.1747	0.055591
Hopx	0.000976268	0.0536007	23.6872	11.8942	7.08055	1.30719	0.184617	0.000169	0.0153227	23.0911	11.7754	12.2389	1.44886	7.13747	0.202994	0.940046	0.49025	4.4094	5.21233	7.67168	7.71077	6.99937	6.93982	6.11769	7.56666	7.98401	9.8509	7.57171	6.92482	0.218438	0.344623	0.898539	0.486096	0.500323	0.421212	1.30726	1.19486	0.138529	1.48331	0.333761	0.862942
Tmem200c	0.0292977	0.624041	24.2921	11.9352	11.3379	0.917498	0.080923	9.216e-05	0.0099353	24.3523	10.5967	10.4434	1.01892	11.4625	0.0888915	0.968862	0.495213	8.54243	10.6958	11.5815	11.3694	11.2561	10.7973	10.3903	11.9547	12.4903	13.2207	12.2527	11.9225	0.531493	0.563504	1.50917	1.00171	0.815117	0.488143	0.32241	0.454113	0.0511052	1.07684	0.293724	0.0375981
Negr1	0.00310885	0.133737	24.8131	12.0237	17.6499	2.8811	0.163236	1.681e-05	0.0024562	26.0699	12.4287	11.4419	2.08147	17.1093	0.121657	0.985293	0.454633	14.8003	18.4734	21.2543	22.4873	20.3985	17.7865	14.8456	15.6545	16.4646	17.796	17.1035	16.1874	2.35936	1.61671	0.912362	0.866713	0.173091	1.71022	1.31106	1.20126	1.65872	1.04354	0.349398	0.391597
Shisa2	2.65693e-05	0.00326194	23.6056	12.0241	1.35548	0.395162	0.29153	1.156e-05	0.0019652	23.4464	11.2008	11.4652	0.357907	1.31983	0.271176	0.987802	0.382221	0.856642	1.17579	2.01295	1.58846	1.71817	1.0417	1.04665	1.26339	1.61339	1.55958	1.25544	1.09718	0.0803729	0.00873382	0.126781	0.222867	0.0072302	0.144408	0.272636	0.208549	0.200308	0.0570544	0.208065	0.0314572
BC023829	1.11959e-05	0.0016358	24.1129	12.0302	58.5243	3.64276	0.0622436	0.0189888	0.273613	24.2463	10.5675	10.4602	3.52768	59.1125	0.0596774	0.999515	0.744032	52.2803	58.9196	61.8523	62.5093	58.5333	57.2377	55.8213	57.1041	61.9709	61.8759	59.0855	56.8147	3.37276	2.45084	0.374173	3.56984	1.15727	2.61085	2.14558	1.4847	2.39929	3.48695	0.781701	3.51118
Elmo1	0.00434029	0.168272	24.9126	12.0329	20.2431	1.17325	0.0579579	0.00064516	0.0394686	25.8254	10.2606	9.53536	1.37314	20.2827	0.0677003	0.993673	0.574433	18.0262	20.3695	20.5423	21.5133	19.8403	19.5851	18.6903	20.6965	20.6553	21.7068	21.9928	20.277	1.57241	1.05497	0.113396	0.178853	0.30648	2.16737	0.0383837	0.0593281	0.346104	0.471005	1.74384	0.0350561
Epb4.1l5	0.000193505	0.0155499	24.1129	12.0366	10.9319	0.817721	0.0748013	0.0239012	0.300724	24.0573	10.696	10.6705	0.881898	11.099	0.0794571	0.991808	0.760871	9.44374	10.9913	11.7456	12.127	11.2809	10.3358	10.2465	11.1735	11.2086	11.1154	11.3312	10.5105	1.38887	0.291583	0.405175	0.668617	0.318671	0.681989	0.750897	0.400869	0.701754	0.303634	0.639749	0.0507553
RP23-132J21.5	0.000309498	0.0223547	24.5235	12.0371	4.83299	1.16247	0.240529	0.006561	0.173391	24.8243	10.5806	10.2293	1.0988	5.04562	0.217773	0.992551	0.679138	2.47204	4.94257	5.91756	6.47061	4.69389	3.96783	4.23342	4.71801	5.20489	5.718	5.50984	4.51612	0.478608	1.08033	0.580524	0.598329	0.125811	0.84467	0.990037	1.04956	0.975408	0.749255	0.526624	0.531849
Fgf1	2.82429e-05	0.00341991	28	12.0377	8.2233	1.78164	0.216657	6.25e-06	0.00122778	26.7906	11.8707	10.6342	1.6414	8.3353	0.196921	0.991686	0.421033	5.75132	8.25196	10.4587	10.673	9.26047	7.57155	7.17099	7.02475	8.01207	8.69234	8.86333	9.14858	0.489108	0.969467	0.704017	0.519005	0.141829	0.303777	0.357	0.0684323	1.66254	0.728914	0.388413	0.858173
Mpc1	0.000663467	0.0403073	26.8627	12.0403	58.9774	4.49527	0.0762202	0.0370178	0.364582	26.1495	10.7894	9.9025	5.72851	59.1484	0.0968496	0.998511	0.796313	54.0791	55.281	60.3798	63.8514	58.3949	54.4653	54.5954	56.2064	62.9969	66.4222	64.6017	62.1872	2.64205	5.08544	2.06332	3.49279	3.03216	4.62294	0.931228	4.63542	2.69928	7.09732	1.43443	5.16658
Mtus1	0.000733661	0.0429483	24.0253	12.0527	29.7327	2.99087	0.100592	0.0500417	0.412273	24.079	10.7867	10.7514	2.75557	30.2572	0.0910715	0.993029	0.82593	23.9536	30.4766	32.5709	33.6087	30.8313	28.2191	27.8941	29.9059	30.6055	31.5249	30.5956	27.4135	6.13149	3.17747	2.10943	0.508513	0.475615	3.22496	3.33272	2.0954	2.74406	0.451694	0.838486	0.613306
Cys1	6.73899e-10	9.92822e-07	24.0253	12.0651	4.54078	1.3595	0.299399	1e-08	4.91111e-06	23.5073	10.9451	11.1745	1.51205	4.50526	0.335619	0.999161	0.229694	2.02028	4.0304	5.57854	5.9385	4.82877	3.02568	3.97004	4.47291	5.67396	5.94174	5.00762	4.15091	0.135746	0.399661	0.0329324	0.694641	0.14664	0.178562	0.584459	0.0826596	0.0868093	0.2005	0.671433	0.106853
Slc16a12	1.21413e-06	0.000261763	24.0253	12.0672	2.47049	0.492041	0.199167	0.000289	0.0226085	23.9634	10.8443	10.8608	0.474586	2.5264	0.187851	0.996092	0.540068	1.53754	2.42058	2.8092	3.07193	2.56422	2.32357	1.80735	2.59573	2.8786	2.71491	2.63184	2.36029	0.191978	0.138127	0.353816	0.17135	0.330447	0.0939751	0.168389	0.239057	0.388354	0.351771	0.22787	0.176009
Rcan2	2.59286e-07	8.64889e-05	26.9126	12.0698	109.072	17.846	0.163616	1e-06	0.000346667	26.3321	12.0855	11.0152	15.8504	109.779	0.144385	0.999041	0.347287	90.5218	109.361	120.707	139.364	121.441	100.626	96.8671	98.8069	108.814	115.559	120.582	106.069	0.780576	9.26581	2.35608	7.59747	2.25715	1.07833	9.60033	0.328612	3.51537	1.53423	14.4032	3.8489
Brinp1	1.29547e-08	8.48248e-06	23.5652	12.0734	4.67351	1.28555	0.275072	1e-08	4.91111e-06	22.8879	10.9032	11.433	1.38173	4.64378	0.297545	0.998875	0.253924	2.70628	3.91686	5.5329	6.31426	4.95628	3.23707	3.89884	5.15216	5.61169	5.62773	5.08908	3.90346	0.119986	0.0553457	0.184444	0.0117851	0.202091	0.315029	0.263597	0.556285	0.528723	0.453337	0.211457	0.461096
Kcna6	7.47212e-06	0.0011581	23.4853	12.0784	25.2856	2.22972	0.0881816	4.761e-05	0.00557447	22.805	10.871	11.4407	2.43924	25.4441	0.0958667	0.996433	0.480458	21.7021	24.0393	27.9266	27.8962	25.8207	23.4505	24.3002	26.0949	26.8738	26.2659	26.0696	23.1181	0.465037	1.47166	0.863151	2.21519	0.0798025	0.285998	1.91303	0.488223	0.0236749	0.628332	1.30962	1.55688
Adamts8	3.69457e-07	0.000112614	23.5251	12.0897	6.64622	1.36062	0.204721	2.56e-06	0.000620011	23.0715	11.1262	11.5739	1.56873	6.79144	0.230987	0.994466	0.299097	4.3997	6.28091	8.20794	8.3424	7.52617	5.55514	6.26548	6.61535	7.22243	7.16235	6.7696	5.28368	0.260576	0.035044	0.226394	0.542195	0.141026	0.569249	0.958032	0.47336	0.269223	0.278858	0.188933	0.258927
Ehd3	1.12821e-06	0.000246242	27.1164	12.0897	13.3332	0.873217	0.065492	1.681e-05	0.0024562	27.0502	11.8895	10.5488	0.899281	13.3063	0.0675833	0.998574	0.453704	12.3346	13.3577	13.4916	14.688	13.8275	12.714	12.8746	12.5627	13.6814	13.7242	14.4597	13.4905	0.435622	0.156848	0.145923	0.62194	0.679182	0.115039	0.83628	0.362497	0.253937	0.119142	0.0984155	0.106839
Tshr	0.000827484	0.0473433	23.8538	12.1023	10.0515	1.48067	0.147308	0.00014884	0.0141478	23.8806	11.3236	11.3802	1.55141	10.45	0.14846	0.947532	0.49851	7.03518	9.96821	12.0861	12.2509	11.0684	9.5405	9.41142	9.51124	10.5956	10.0911	9.88964	9.34088	0.648323	0.705612	0.326622	0.0387355	0.721356	0.428451	1.49303	0.803952	1.45153	0.32158	0.279268	1.02834
Gm26778	0.000657412	0.0400772	27.3803	12.1053	41.4473	4.33774	0.104657	0.0111936	0.218437	26.5174	11.5986	10.4975	5.15875	41.5908	0.124036	0.929869	0.711548	33.9397	40.5733	43.5196	46.5695	44.9856	36.7342	38.7309	41.8514	40.6582	43.3057	48.5729	43.3118	5.64042	1.36506	0.883305	3.25387	2.69835	2.82977	3.81645	4.95992	4.92199	2.97102	1.40905	0.347363
Cyp4f14	0.000537113	0.0345295	23.2903	12.1085	14.5261	2.26247	0.155752	0.00114921	0.0599352	23.7781	11.6555	11.7643	2.29518	14.8004	0.155075	0.81237	0.275687	11.447	14.3811	17.6135	18.5646	16.6378	13.7038	13.9388	13.6571	14.043	14.8081	13.3756	11.765	0.912537	0.632719	0.0398081	1.38809	0.055843	0.348259	0.258706	0.706697	0.0851985	0.749393	1.5211	0.4129
Gsta4	6.00173e-05	0.00620495	23.982	12.1471	254.402	19.4797	0.0765707	0.00116281	0.0601125	24.391	11.8742	11.6838	18.0797	257.883	0.0701082	0.810077	0.386999	220.102	252.839	280.339	280.733	268.453	258.21	242.968	246.529	252.178	266.569	248.901	241.528	1.14948	2.92375	2.84103	8.96908	10.2468	17.1216	3.54468	12.939	6.45856	5.31731	7.4328	1.43178
Fgf2	0.000404029	0.0279016	23.8962	12.1555	17.6721	2.44005	0.138074	0.00032761	0.024543	23.3523	11.1382	11.4471	2.13058	18.2692	0.116621	0.919191	0.54323	11.2697	16.7016	20.3496	20.966	18.8706	16.2602	16.9267	18.414	18.6142	18.6286	18.4092	17.0011	2.5689	1.97196	0.59569	0.915042	0.442995	1.2266	2.46153	2.24036	2.40609	0.18397	0.436957	0.670938
Kctd12	0.000545765	0.0349586	26.963	12.1958	35.4704	3.21403	0.0906118	0.00354025	0.124685	26.1994	11.5775	10.6056	3.9761	35.3827	0.112374	0.937748	0.64791	28.9034	33.8607	36.3074	39.5806	37.6328	31.8409	33.6664	36.1884	35.8734	37.8677	40.7766	37.0664	4.34541	0.291395	1.67505	4.17749	3.04176	0.427267	1.39558	1.68981	1.61223	4.25669	0.0578524	2.73726
Polr3gl	0.00065713	0.0400772	26.4299	12.1977	18.9476	1.14123	0.0602309	0.0184416	0.269239	24.7481	11.5231	11.1747	1.18805	19.1002	0.0622007	0.989968	0.742309	16.5624	18.8	19.4311	20.7695	19.0355	18.4001	18.6055	18.1617	20.171	20.0195	19.8422	19.0024	2.85231	0.451233	0.586865	0.393304	0.420713	0.745102	0.540244	0.275524	1.18423	0.421579	1.03509	0.992937
Casq2	0.00172201	0.0838342	26.9126	12.2129	5.71867	0.671952	0.117501	0.00036864	0.0264941	25.8468	11.2914	10.4846	0.642701	5.83972	0.110057	0.907981	0.534412	3.92315	5.23334	6.34807	6.42554	5.49982	5.63643	5.42342	5.49181	5.99917	6.79564	6.2917	6.32134	0.509903	0.893565	0.52835	0.653957	0.327046	0.447917	0.040559	0.231372	0.0759366	0.211808	0.763314	0.219261
Klhl32	0.000821196	0.0471361	27.9413	12.2421	5.65188	0.381795	0.0675518	0.00851929	0.198447	26.6375	12.6121	11.3633	0.379206	5.67825	0.0667823	0.98516	0.694835	4.94679	5.36873	6.07583	6.10605	5.85724	5.66924	5.38487	5.5731	5.57846	5.80001	5.95118	6.05688	0.0174494	0.441228	0.212146	0.0721098	0.0841097	0.0870591	0.703291	0.226868	0.252698	0.35974	0.21091	0.241924
Ndnf	0.00069682	0.0414784	23.1018	12.2675	3.24345	0.539193	0.166241	0.00197136	0.0860584	23.1911	11.1652	11.5547	0.467453	3.44305	0.135767	0.7498	0.316921	1.50692	2.86087	3.95589	3.99901	3.49499	3.24381	3.11633	3.46465	3.50784	3.31651	3.20845	3.10809	0.440479	0.284198	0.0938841	0.139824	0.0163835	0.323501	0.24297	0.186021	0.030258	0.298247	0.0117261	0.354631
Pcgf2	0.0206377	0.499758	20	12.2751	31.6973	1.69479	0.053468	0.00090601	0.0499011	21.3795	12.7632	14.3276	1.40049	31.7802	0.0440681	0.836076	0.408151	32.647	31.3251	33.1244	33.9463	33.6827	30.6515	30.2816	31.571	32.4653	31.3754	30.4029	27.0024	0.47137	0.0840269	1.21587	0.448923	0.835032	0.143607	1.3833	1.14503	0.755319	0.500256	1.33007	0.945275
Synm	0.000465433	0.0310505	23.7699	12.2758	29.8158	4.40142	0.147621	0.00286225	0.107669	23.8358	11.912	11.9941	4.50966	30.8711	0.14608	0.979704	0.635021	20.8996	27.3314	33.8222	36.8831	33.4236	29.104	27.8718	29.3628	30.7238	30.9669	29.8419	27.8907	3.32853	1.72517	0.248532	2.31515	0.634861	2.66659	4.67293	4.09707	4.96488	3.29843	0.441825	2.00232
Txndc16	5.06414e-05	0.00543696	23.939	12.3205	54.2817	8.77337	0.161627	2.5e-05	0.0034	23.8552	11.9541	12.0267	8.1146	56.395	0.143889	0.981123	0.445059	35.4968	47.5682	61.834	68.7817	59.9704	53.6928	50.3969	53.7689	56.3369	57.514	54.945	52.2551	5.49332	5.53014	5.00106	0.0428545	1.05755	5.02187	3.1165	3.0454	6.73377	4.70467	0.631882	3.19977
Endod1	6.83808e-06	0.00107938	26.5235	12.3313	44.7291	3.23648	0.0723574	2.56e-06	0.000620011	24.9648	12.1005	11.6328	3.33343	45.2948	0.0735941	0.994037	0.291668	38.2405	42.8645	46.8153	47.8791	47.6217	43.2104	43.1611	43.5971	46.7463	46.6689	48.8494	44.9057	0.450598	0.4976	0.386669	2.17947	3.07682	1.20482	0.301762	0.419243	0.108191	0.77417	0.29995	0.742028
Eif5a2	4.85793e-06	0.000858834	26.5235	12.3705	9.21311	1.38402	0.150223	7.29e-06	0.00137114	24.803	12.0926	11.7011	1.42002	9.3534	0.151818	0.997007	0.428438	6.36196	8.48117	9.82703	11.322	10.0254	9.08239	8.05187	8.89112	10.0989	9.923	10.1772	9.67889	0.660596	0.264276	0.330089	0.354777	0.652815	0.774388	1.11809	0.769713	0.935408	0.196395	0.0612361	0.440326
Zhx2	0.000243095	0.0186888	23.0649	12.3788	38.7181	2.60226	0.0672105	0.00038416	0.0269522	22.6639	11.8922	12.5933	2.31599	39.152	0.0591538	0.906009	0.461132	33.2257	37.8613	40.4431	41.4173	42.001	38.0552	38.2278	39.1692	40.2711	39.934	38.245	35.6828	0.0308269	0.566575	2.52612	1.64431	1.19401	1.53778	2.53218	0.358503	1.36979	1.00855	0.535881	0.2653
Mamdc2	0.00187288	0.0894881	23.4065	12.391	36.4082	5.52734	0.151816	0.00081796	0.0472599	23.0531	11.6402	12.1183	5.52896	38.0867	0.145168	0.848716	0.53067	22.5473	31.007	41.4519	44.8772	39.9988	35.5214	36.8354	36.8519	38.1155	39.6631	35.7742	33.7468	3.15445	4.57508	3.37151	1.4954	1.37344	2.97358	6.2035	0.308948	3.39001	4.23462	0.764187	4.25451
Steap3	0.00050386	0.0331551	23.5251	12.7132	24.4225	3.35488	0.137368	0.00494209	0.149873	23.3783	12.5598	12.8938	2.72719	25.2127	0.108167	0.604826	0.289515	14.7257	20.0195	26.5958	28.0177	26.7933	25.0487	25.2801	24.5742	26.6114	27.8405	24.7473	22.797	0.446812	0.268222	3.02636	2.89163	0.768566	0.281772	0.979253	0.738327	0.561682	1.80535	0.723233	0.636331
Gm20402	0.0186827	0.473448	28	12.8767	36.4603	5.96541	0.163614	0.00027556	0.0219455	27.1319	12.8827	11.3956	4.65632	35.941	0.129555	0.921764	0.518128	32.6912	36.7448	45.7193	45.167	40.9381	34.2324	36.5303	28.8282	31.7421	36.3762	38.5782	35.7894	1.3327	2.48858	9.10519	2.88799	3.53964	0.236684	2.05851	1.03665	1.12607	1.97096	2.05694	3.72339
9330162012Rik	0.0121284	0.355035	28	13.0165	2.65859	0.447973	0.1685	0.00057121	0.0360678	26.7663	12.96	11.6205	0.337382	2.61105	0.129213	0.882927	0.569574	2.29041	2.70428	3.42391	3.02021	3.16803	2.74924	2.30836	2.24499	2.31744	2.64981	2.76758	2.60893	0.2071	0.0458551	0.696757	0.148643	0.0886019	0.0534132	0.0191844	0.456739	0.0863848	0.321796	0.27867	0.151073
Paqr6	9.21783e-07	0.000214424	26.8131	13.3423	4.43463	0.626664	0.141311	5.29e-06	0.00105087	25.6138	12.4948	11.7075	0.566373	4.47946	0.126438	0.993442	0.419767	3.0405	4.19887	4.73402	4.99903	4.85727	4.42511	4.10685	4.03373	4.56256	4.89675	5.40385	4.45017	0.0537296	0.371526	0.154924	0.0158228	0.138989	0.141448	0.167867	0.0649491	0.124586	0.377604	0.244956	1.18248
1700026D08Rik	0.00860463	0.277976	24.5709	13.387	17.0586	1.13461	0.0665127	0.00016384	0.0150869	25.0299	12.4846	11.9709	1.19724	16.868	0.0709767	0.962584	0.517239	15.1186	16.8198	17.3835	18.0563	17.0311	17.7405	16.0186	15.9939	16.8051	19.6082	17.417	17.3567	0.0809443	1.5931	0.5514	0.15727	0.511693	0.128161	2.03415	0.217616	0.180268	0.474498	0.862194	0.297849
F11r	0.0010201	0.0558339	24.7151	13.4019	30.402	1.39927	0.0460257	0.00018496	0.0160299	25.9998	12.1778	11.2412	1.57213	30.4562	0.0516195	0.935932	0.440858	27.3491	29.9913	30.3831	31.9308	30.4372	30.3857	29.9638	29.3318	31.0443	31.3505	33.6926	30.0608	1.35825	0.708329	0.361602	1.37414	0.443009	1.27174	0.613362	1.14949	0.455427	0.0364645	0.0706889	0.184055
Vit	0.000114212	0.010408	23.8962	13.6265	91.143	13.2992	0.145916	0.00046225	0.0306089	24.1707	12.6944	12.6048	11.4688	91.4622	0.125394	0.893715	0.267134	63.3466	80.482	101.101	110.147	105.24	94.2184	88.7155	87.31	91.3905	96.5443	93.6632	83.5149	3.89494	6.68922	1.98145	5.54092	1.43926	4.08143	0.384925	1.58518	3.71803	4.35071	4.98328	0.834719
Usp43	0.00500677	0.184844	23.3675	13.6359	6.08667	0.54316	0.0892376	0.00069696	0.0420555	21.8329	12.6783	13.9367	0.593926	6.15052	0.0965651	0.960529	0.577412	4.87345	5.06625	5.9818	6.52527	6.44231	5.7139	5.95718	6.34413	6.6468	7.07923	6.48266	5.97424	0.100332	0.528955	0.397429	0.57131	0.287876	0.189835	0.459811	0.204314	0.270103	0.40153	0.450026	0.586577
Adcyap1r1	3.97939e-06	0.000740544	24.1572	13.7051	14.0101	2.49185	0.177862	0.00011449	0.0116332	23.6624	12.4897	12.6679	2.24197	14.5817	0.153752	0.953765	0.35742	7.21067	10.7286	14.4759	17.1356	15.4249	13.5581	13.4158	13.7407	15.696	16.5487	16.223	14.4432	0.448503	1.63275	0.367018	2.2338	0.287063	0.333899	1.3516	0.842967	0.534538	1.54982	1.64143	0.626711
Mettl7a2	0.00408133	0.162088	20.7431	13.7626	0.884893	0.254428	0.254428	0.00065536	0.0399544	23.13	12.5042	12.9745	0.27258	0.800916	0.340336	0.867375	0.535431	0.82811	0.544733	0.887429	1.40847	0.888119	0.661739	0.74282	0.88903	0.877531	1.13402	0.909499	0.572874	0.0569246	0.159543	0.040547	0.530841	0.0354889	0.111783	0.0716664	0.199434	0.138416	0.0154701	0.123819	0.0376371
Ivns1abp	0.000561681	0.0357653	24.2018	13.79	136.463	12.0214	0.0880932	0.00285156	0.107496	24.0746	12.9564	12.9162	8.32755	139.938	0.0595089	0.699967	0.365956	95.6342	121.151	141.715	152.531	145.101	143.678	133.474	138.052	142.563	147.405	140.923	139.54	10.8802	8.19157	2.24625	3.58341	1.11406	5.12252	15.1024	4.60038	8.39576	3.54107	3.17152	0.388944
Oplah	8.82585e-06	0.0013112	23.6056	13.8278	61.0841	9.74202	0.159485	0.00010609	0.0109688	22.9857	12.5161	13.0684	9.40576	63.0313	0.149224	0.957823	0.366644	37.5661	48.1896	65.0423	72.9295	70.7805	59.4102	59.7209	60.8071	67.8612	68.4855	65.4181	57.2736	2.66793	0.953918	3.79178	7.97624	5.80251	3.45011	0.707275	1.66953	5.55589	3.34513	4.19962	4.03891
Ubtd2	0.000728117	0.0428064	27.4343	13.8552	43.8695	2.86369	0.0652776	0.00079524	0.0465558	26.2046	13.8785	12.711	3.36752	44.1931	0.0762001	0.850206	0.520294	38.3992	41.8649	46.1223	43.4822	47.6312	45.9604	40.4327	42.9733	42.4689	45.7748	47.4774	46.3895	1.51811	1.5191	0.698272	0.474843	1.21664	4.35313	2.05849	3.81255	0.868141	0.299473	0.317458	1.18547
Tnn	9.91164e-10	1.19066e-06	26.6186	13.887	5.8611	3.2721	0.558275	0	0	25.4362	12.9507	12.2195	3.56111	5.96879	0.596621	0.999907	0.178015	1.72963	3.14233	6.98479	9.60079	8.87219	5.63478	2.53736	3.19786	6.50482	8.23608	8.22016	7.23008	0.0657573	0.219027	0.910844	0.921764	1.08593	0.222618	0.0695623	0.00482825	0.624284	0.411755	0.523516	0.710272
Hfe	0.000105052	0.00987877	24.1129	14.0288	32.0279	2.93877	0.0917565	1.6e-05	0.00241778	23.855	13.0508	13.1301	2.94608	32.3663	0.0910231	0.985108	0.39766	25.6017	29.4964	31.7556	37.289	34.4828	31.9537	31.145	31.4364	33.1113	33.0975	34.382	31.5071	0.871943	1.62759	0.0325604	1.88764	0.20682	0.264457	1.24983	2.15201	0.300552	0.803542	2.01998	2.28397
Cadps2	0.000789052	0.0455871	26.8131	14.4305	2.84985	0.355261	0.124659	0.00024025	0.0198487	25.143	13.3576	12.7504	0.459348	2.94085	0.156196	0.926557	0.380179	1.87091	2.25433	2.82099	3.50724	2.98673	2.94516	2.72946	2.8612	2.93454	3.00503	3.34998	3.10435	0.096974	0.0505864	0.0156513	0.13222	0.29325	0.0930691	0.519802	0.0636009	0.244447	0.0147203	0.176	0.308203
Cry1	7.9187e-10	1.07688e-06	24.069	14.5542	13.0895	5.15373	0.39373	1e-08	4.91111e-06	23.7728	13.1818	13.3077	4.89319	13.9566	0.3506	0.999075	0.201073	3.51427	5.8389	13.2455	18.1338	17.2431	13.268	9.6138	10.7561	15.4586	18.4569	17.7541	14.2002	0.467823	0.882641	0.0902592	1.04185	0.452157	1.53657	1.84183	0.585988	1.22567	1.15575	1.50422	0.989581
Tubd1	0.0016294	0.0800169	24.3377	14.7254	7.31269	0.660272	0.0902913	0.00021025	0.017701	24.1779	14.4237	14.3176	0.657937	7.48658	0.0878822	0.971263	0.52801	5.94424	6.93133	6.91778	8.10546	7.74973	7.98933	6.31711	7.20684	7.36842	8.02302	7.74874	7.67657	0.780947	1.13093	0.288698	0.0471613	0.570347	0.185974	0.0233467	0.373679	0.00169974	0.586304	0.220206	0.180382
RP23-437D10.1	1.60549e-05	0.00220027	23.5652	14.7565	0.442246	0.286637	0.286637	0.0181441	0.267497	22.9707	14.0661	14.6964	0.289945	0.428607	0.676483	0.999047	0.74149	0.159491	0.158574	0.399153	0.679026	0.584032	0.554917	0.166041	0.249142	0.547739	0.700809	0.82301	0.27337	0.0199468	0.0011779	0.000597845	0.248308	0.110983	0.255681	0.234817	0.0985703	0.0392482	0.465553	0.509213	0.121853
Nmb	1.79075e-08	1.05529e-05	23.7699	14.7719	18.1984	3.57291	0.196331	2.116e-05	0.00294574	23.2149	13.388	13.8408	4.12556	18.5709	0.222153	0.982794	0.410338	10.7085	14.0896	17.5075	21.172	21.2567	18.4566	16.961	16.0899	19.8752	23.9727	21.085	17.539	2.18169	2.31727	2.60805	1.32215	1.07914	0.423041	1.81217	0.389332	0.653358	1.27364	2.30514	1.36469
Papss2	0.0024272	0.109466	28	14.9773	22.1453	2.5604	0.115618	0.00082369	0.0472819	25.4894	15.0655	14.1852	2.07712	22.9911	0.0903445	0.847341	0.231121	15.6592	18.7778	22.5216	26.1718	25.1296	25.0703	21.9808	21.4245	22.2309	22.1838	22.859	22.3367	0.611062	0.741977	1.16326	0.0420802	0.600763	0.319128	0.393217	0.308267	1.82696	1.14778	0.223801	0.479431
Cadm2	0.000131941	0.0117807	26.8131	15.0181	7.87104	0.964491	0.122537	2.116e-05	0.00294574	25.1507	14.7603	14.085	0.907342	7.91434	0.114645	0.983625	0.46195	5.49295	6.59645	7.66607	9.23803	9.11623	8.28059	7.69031	7.7866	7.70249	8.29056	8.66361	8.21932	0.685895	0.68461	0.266137	0.591597	0.0764985	0.586506	0.876382	0.437401	0.99427	0.369175	0.101466	0.0946608
Slc22a5	0.000507785	0.0331551	26.2018	15.0517	22.8237	1.15663	0.0506768	0.00154449	0.0726239	24.5934	14.0122	13.6741	1.56129	22.7636	0.0685873	0.782689	0.428226	20.5032	20.1837	22.9311	24.9088	23.9125	22.3829	23.6747	21.8565	23.3887	23.563	24.2738	23.0155	0.668106	0.356454	0.877696	0.735767	0.510197	0.863296	0.898031	0.59482	0.846192	0.202355	0.187646	0.643949
Kcnj10	0.00343749	0.142016	27.5992	15.0538	484.545	41.6464	0.0859495	0.00088804	0.049218	25.7172	14.7434	13.7589	35.7568	492.933	0.0725389	0.878999	0.585732	351.242	422.596	483.282	529.347	517.159	522.229	475.843	480.358	489.287	500.176	522.773	533.582	45.3989	24.5345	17.4999	15.7534	16.5578	57.0317	48.6879	30.6649	47.046	32.263	3.7261	29.8003
Skil	0.000310377	0.0223547	28	15.887	14.5778	1.74996	0.120043	0.00687241	0.17921	26.1161	16.2654	14.9475	1.40729	14.6878	0.0958132	0.998462	0.681474	14.3772	13.9069	14.1967	16.0548	16.6441	15.4845	13.8457	12.6886	12.58	13.4883	16.1801	15.2396	1.87073	0.153921	0.0317917	1.02469	0.930728	1.51607	0.201326	0.0820511	1.46545	1.90535	0.476855	1.42074
Pik3r1	5.21199e-05	0.00555077	24.2018	15.9697	35.616	2.74503	0.0770728	0.00126025	0.0640265	24.688	15.218	14.7939	3.16882	35.379	0.089568	0.99708	0.600489	32.1766	33.2551	33.7012	36.5865	39.2209	36.3146	32.9791	34.2395	35.2018	36.9565	40.5568	37.1281	2.97027	0.514663	0.392011	3.55124	1.37285	0.839298	2.35798	0.794894	1.37746	3.12772	0.109227	1.14765
Chil1	2.03687e-06	0.000406657	24.2018	16.0645	13.9496	4.05311	0.290554	6.76e-06	0.00131337	24.3197	14.4512	14.2612	6.1691	14.1949	0.4346	0.989974	0.225124	4.65281	7.16277	10.4613	16.3311	16.7927	13.8626	12.6284	11.1473	14.2756	20.7149	22.6747	17.0316	0.798888	0.468622	1.0972	1.06542	1.94642	1.32535	0.237452	0.411312	0.367435	2.60243	3.4596	0.316457
RP23-298M23.3	0.000179428	0.014754	23.939	16.0902	19.9547	3.72873	0.18686	0.00017161	0.0153262	23.0868	14.1953	14.7568	5.94449	20.5412	0.289394	0.938804	0.409436	8.37539	11.3553	16.2506	22.4593	24.2363	18.974	19.6702	17.9003	23.4881	27.6412	27.5834	22.0453	1.30175	1.58239	2.48958	0.851579	0.522037	6.13163	3.55473	2.29325	3.50901	4.23418	2.01893	0.605603
Rorc	1.71547e-05	0.00228028	24.2468	16.098	17.68	3.60881	0.204118	0.00011449	0.0116332	24.0792	14.5261	14.4784	4.53554	18.5825	0.244075	0.955668	0.172885	6.9415	9.21981	14.5472	20.718	21.5285	17.8633	17.239	16.4247	19.5152	23.4214	24.0792	21.106	0.633925	0.711469	1.86649	0.565183	0.987038	0.989968	2.27611	0.308036	0.258932	1.65019	0.0364017	0.75725
Gstt1	2.41405e-05	0.00302681	24.3836	16.0995	66.7241	8.15424	0.122208	0.00109561	0.0581693	24.7597	14.778	14.3246	8.66191	69.1869	0.125196	0.819208	0.238556	36.9075	48.9248	63.2851	76.2793	78.8885	70.7979	68.7832	64.6039	70.3123	76.7449	74.5019	72.3266	1.65141	1.90583	3.77579	0.745058	2.10411	2.10873	3.00099	0.988603	3.08641	7.05457	5.76916	3.26303
Gpld1	4.61733e-05	0.00507018	24.069	16.1252	29.4367	5.74638	0.195211	0.00046656	0.030779	25.0238	15.4776	14.8443	5.55128	31.3486	0.177082	0.893555	0.145177	16.5049	18.7834	27.1932	35.7736	38.1176	36.5972	29.3933	27.7679	30.1257	32.8569	31.5729	29.3083	0.211297	0.35784	1.04819	0.546505	0.517482	1.47805	1.73911	0.176465	0.588892	2.69386	1.00385	1.05072
Prr5l	0.0124098	0.35966	23.3675	16.245	9.72582	0.867623	0.0892082	0.00086436	0.0485139	23.2587	16.1311	16.6452	0.733221	9.61078	0.0762915	0.924511	0.584375	9.31238	8.63412	9.45896	9.65808	11.5164	9.82689	9.87143	9.32687	9.35188	9.78502	11.086	9.14436	0.322642	0.0496301	1.12385	0.0266422	0.720228	0.015376	0.910438	0.799524	0.313532	0.536667	0.116835	0.72273
Lect1	0.000307703	0.0223547	24.1572	16.2931	51.5214	9.32174	0.180929	0.0165122	0.256986	24.2584	15.1155	14.9546	9.76301	56.1248	0.173952	0.328241	0.215976	14.7941	23.449	40.0645	59.6388	62.3288	60.2829	54.2862	51.2289	59.2341	68.7671	64.8686	60.5698	1.00762	5.41498	5.08248	1.14648	4.97344	0.202513	6.0923	0.49842	2.98654	9.98118	0.574395	5.9125
Ccdc149	0.000165189	0.0141081	26.3836	16.3177	7.82258	0.572792	0.0732229	0.00101761	0.0546849	24.836	15.8496	15.3161	0.659845	7.90469	0.0834751	0.995458	0.59209	6.99073	6.95162	7.2499	8.22817	8.22084	8.41893	7.74844	7.30136	7.56521	8.43108	8.39467	8.4316	0.249336	0.870513	0.193367	0.685883	0.720677	0.132898	0.00142219	0.248203	0.0975785	0.0108132	0.480056	0.522929
Gm7694	0.00126504	0.0659723	27.3267	16.343	12.778	0.841229	0.0658344	0.00033856	0.0251502	26.1408	16.0164	14.7048	0.920738	12.9122	0.0713075	0.951274	0.546822	10.7514	12.0401	12.5236	13.3417	13.8679	13.5428	13.348	11.8637	12.4567	13.038	13.6927	12.854	0.256271	0.747803	0.721256	0.415274	0.248124	0.159213	0.489588	0.920646	0.0847628	0.072208	1.58364	0.230342
Spire1	0.000808437	0.0465549	27.8831	16.3975	37.9501	2.8376	0.0747718	0.0352688	0.356724	26.6204	16.9747	15.3038	3.12565	38.3251	0.0815562	0.995664	0.791759	32.9347	34.5256	36.7763	38.1949	41.2901	41.1569	37.4608	36.7106	36.5394	37.7553	39.7712	41.7581	2.63308	1.36377	0.0610557	0.712662	0.325117	5.31975	5.38884	1.98379	3.18391	0.471682	0.796408	3.5987
Aaed1	0.000186048	0.0151479	28	16.7112	33.585	2.28791	0.0681231	0.00040401	0.0276856	27.0622	14.78	13.1076	2.5891	33.419	0.0774737	0.981128	0.554172	29.7778	30.0592	33.9068	35.6665	35.0958	34.1491	32.2457	32.8782	31.2033	34.3334	35.3071	37.6199	0.0415693	0.743767	2.87128	0.695607	0.795026	3.06231	0.911647	0.162299	2.33447	0.373761	2.57705	1.17893
St3gal5	0.424056	1	23.0282	16.9071	54.4692	3.07628	0.0564774	0.00059536	0.0373261	24.0919	16.5474	16.4842	2.11214	54.6941	0.0386173	0.981316	0.571	56.5814	52.4248	54.6753	58.5473	57.8939	57.1174	54.0999	51.2983	51.0639	54.1384	54.8476	52.6512	0.331168	1.11262	0.0756463	2.05346	0.00711227	1.36209	0.942881	1.16044	1.07012	3.52206	1.09181	4.45118
Sav1	0.000787049	0.0455871	23.8117	16.97	51.4436	1.78682	0.0347337	0.0136189	0.237569	23.7	17.0694	17.2855	1.96562	51.1721	0.038412	0.973137	0.724272	50.7939	51.324	50.894	51.4775	52.9843	53.7071	50.0205	49.0427	50.5848	51.6624	53.7489	52.4725	1.43184	1.33333	0.295176	0.242305	2.0441	0.0671959	1.98528	0.807638	2.00559	0.765589	0.588927	1.00718
Snx18	0.000572963	0.0360477	24.069	17.1536	51.1023	2.68358	0.0525138	0.00751689	0.188242	24.1128	17.3096	17.2287	2.38415	51.5756	0.0462263	0.980941	0.685926	51.7851	49.2554	50.4371	51.6051	53.8864	53.4595	49.7464	50.0376	47.4827	50.3273	54.1048	52.4112	1.27366	0.184115	2.81655	1.94372	0.139898	3.02609	0.0724274	0.445259	2.50288	1.16099	2.08848	1.02008
Zcchc12	0.00329892	0.139192	24.4765	17.2375	28.7388	1.84527	0.0642083	0.00026244	0.0210906	24.6855	15.9468	15.5039	2.68718	28.3587	0.0947568	0.93865	0.536711	25.6822	25.1477	27.0036	29.0494	29.2053	31.6503	26.9664	27.3296	28.7285	31.077	31.165	32.4533	5.99601	1.16682	1.51882	1.57842	0.318414	0.915308	1.09138	0.354127	0.765854	1.61209	0.156877	0.0961416
Wwtr1	1.36316e-05	0.00189759	28	17.2653	146.547	12.5005	0.0853006	0.00088804	0.049218	26.8018	16.8909	15.1251	12.1032	147.503	0.0820544	0.99585	0.585447	124.096	132.764	140.798	154.697	159.698	158.213	147.165	142.518	137.89	141.923	154.992	156.648	10.1776	2.2918	2.37229	4.93789	2.17242	16.2341	6.37017	8.45182	10.9269	1.52501	6.26812	7.09006
Mir7649	0.000580536	0.0363947	22.9195	17.2732	4.64027	2.34981	0.506396	0.00535824	0.154794	21.5469	17.7501	19.7709	2.52783	4.76925	0.530027	0.996065	0.669028	5.84242	2.12942	2.68002	4.55918	5.59917	5.96982	3.245	2.81043	2.61278	7.24802	7.88595	5.58137	0.0206087	0.0158175	0.0040141	1.66721	1.5178	1.33766	1.43587	0.566772	0.403372	2.09996	3.82603	2.77237
Nfil3	2.26883e-10	5.96354e-07	24.3377	17.3816	10.2512	5.08913	0.496443	0	0	24.9441	17.5583	16.8938	4.34405	10.0853	0.430732	0.9997	0.15405	8.97005	5.7529	7.00627	10.94	16.8867	15.7585	9.39018	6.01324	7.00073	9.30128	13.4777	12.4536	1.20398	0.102931	0.312521	0.364101	0.798568	1.084	0.598192	0.303042	0.483714	0.403183	0.915813	0.316876
Rgs12	0.000410715	0.0280349	23.2521	17.3923	31.5688	2.01578	0.0638536	0.00100489	0.0544983	23.5775	17.3699	17.6812	1.72032	31.8636	0.0539899	0.973429	0.59092	32.0171	29.266	30.2469	32.3449	34.668	33.426	31.8494	30.4885	30.2561	31.3788	33.0871	30.8792	1.02917	0.614281	1.37923	1.63719	1.67786	1.59719	1.30105	0.143115	0.873051	0.0879483	0.111453	0.574546
Aim1	1.6553e-06	0.000344284	26.5235	17.4003	21.1483	1.85019	0.0874861	3.481e-05	0.00442763	25.2179	16.9138	16.097	1.97201	21.0314	0.0937652	0.999749	0.474288	19.7391	19.0268	19.6759	21.476	23.858	22.4868	21.0458	19.9083	19.7218	21.0317	23.1753	22.1255	0.777551	0.218315	0.173599	0.467664	0.0996632	1.95032	1.66814	0.577546	0.00319196	0.0801203	1.40062	1.42287
Rnf144b	0.000203273	0.0161151	27.8254	17.4779	7.04857	0.586556	0.0832163	0.00131769	0.066184	26.977	17.0087	15.1317	0.659425	7.12499	0.0925511	0.961467	0.601758	5.97836	5.87126	6.47188	7.4529	7.57882	7.28912	7.30778	7.05179	6.74071	7.0271	7.45157	8.01023	0.883586	0.816024	0.0134615	0.219907	0.33307	0.242803	0.631111	0.617923	0.422128	0.21341	0.0495476	0.22966
Nmt2	4.68404e-06	0.000836455	28	17.4995	35.1954	3.74922	0.106526	3.24e-06	0.000753726	27.0392	17.5342	15.5633	3.66421	35.1701	0.104185	0.993509	0.396038	30.026	30.406	32.586	38.3882	37.8828	39.7925	36.2228	33.7883	32.3437	33.9993	36.6246	37.603	2.94092	1.76823	0.0503147	1.44015	0.28319	2.27057	2.1913	1.09112	0.517929	1.68252	1.05092	0.0696606
Ccnjl	2.07419e-05	0.00265721	22.9555	17.6719	1.49279	0.356094	0.238543	0.00028561	0.0224426	21.7487	18.1949	20.0783	0.349051	1.4793	0.235957	0.996617	0.539412	1.68752	1.28266	1.29657	1.27388	1.94031	1.69023	1.34307	1.14302	1.20518	1.66399	1.80957	1.6899	0.100832	0.10092	0.0350394	0.168846	0.140104	0.252738	0.247236	0.061908	0.158271	0.235134	0.204725	0.0427989
Gm23841	0.367244	1	24.1379	17.6945	0.116214	0.179366	0.179366	0.00034596	0.0254857	23.4237	17.9427	18.3841	0.1454	0.119488	1.21685	0.963516	0.548475	0	0	0	0	0.27314	0.242656	0	0	0	0	0.579656	0.296457	0	0	0	0	0.386278	0.343167	0	0	0	0	0.0999718	0.419253
Gna13	2.92195e-08	1.59248e-05	27.5438	17.7135	75.0484	8.26117	0.110078	2.89e-06	0.000690476	26.6885	17.9766	16.1657	8.76441	74.9432	0.116947	0.999823	0.39569	70.1714	65.1907	68.3211	78.2759	82.8659	83.6309	76.1052	71.0384	67.9455	70.8898	79.2334	81.2924	3.23438	0.490806	3.12963	5.20499	2.64651	0.864103	1.39791	0.216351	2.4646	3.79535	3.20314	3.72963
Ikzf4	5.66017e-05	0.00595632	27.1164	17.752	4.01998	0.889976	0.221388	0.00331776	0.119466	25.9177	18.145	16.8024	0.996836	4.10677	0.24273	0.998449	0.645652	3.78336	2.79778	3.29073	4.27299	5.10437	5.04008	4.25962	3.37655	3.35599	3.739	4.40557	4.18839	0.537149	0.201568	0.0982215	0.364337	0.44037	0.951452	1.1241	0.282137	0.455071	0.355637	0.187652	0.47975
Gm26885	7.94272e-07	0.000200599	27.3803	17.9015	4.48286	1.50746	0.336272	9e-08	3.78857e-05	26.425	18.1965	16.5266	1.58656	4.46659	0.355205	0.998105	0.325227	3.47168	2.22549	3.21606	4.45381	6.64213	5.95321	4.92281	3.60527	3.76623	3.69141	5.46726	5.06901	0.558811	0.0664828	0.612554	0.377846	0.0502885	0.758576	0.0993094	0.124248	0.248356	0.515675	0.342992	1.21243
Fzd5	0.212663	1	22.778	17.9065	17.1323	2.21808	0.129468	0.000484	0.0315761	23.7608	18.3001	18.4843	1.41657	16.8787	0.0839263	0.88959	0.334824	21.4473	16.3294	16.781	18.3474	19.345	18.6367	16.4186	14.7418	14.8577	15.1439	17.608	16.9822	0.425067	0.268899	0.511118	2.22341	0.166064	1.39906	0.24969	0.163914	1.08671	0.229565	0.338147	0.931164
Gm17315	1.21238e-05	0.00170108	27.5992	17.9087	2.34681	0.404986	0.172569	0.00285156	0.107496	26.7041	17.146	15.4098	0.488294	2.3533	0.207494	0.995856	0.634907	1.73802	1.88123	2.05285	2.31667	2.80829	2.55374	2.31637	2.27184	1.92854	2.24599	2.68664	3.02004	0.135478	0.0476474	0.0242655	0.389677	0.213972	0.513053	0.137686	0.369103	0.114019	0.177543	0.555273	0.300806
Lnx2	1.11977e-08	7.61402e-06	26.2468	17.9155	9.95484	1.16149	0.116676	1.089e-05	0.00190629	24.5482	17.8728	17.4737	1.20642	9.93982	0.121372	0.999916	0.435462	9.78989	8.78069	8.80769	10.1787	11.0787	11.3218	9.85879	9.12296	8.85081	9.88752	10.6819	10.6363	0.37499	0.416782	0.715714	0.154556	0.624693	0.797571	0.491852	0.0454663	0.144077	0.261538	0.289078	0.358456
Sgms1	0.000273117	0.0203731	26.7639	17.9801	24.5739	2.31818	0.0943349	0.00984064	0.20754	25.6611	17.104	15.9968	2.69173	24.8594	0.108278	0.997126	0.702595	21.0109	21.0549	21.418	24.8503	26.3491	27.2405	24.205	23.6866	23.2234	25.158	27.664	27.8446	2.97395	0.89377	0.113285	0.0465976	1.86248	2.5985	3.27444	2.36195	3.00414	1.34165	1.19853	1.38469
Nhs	0.00031509	0.0225525	27.8254	18.0198	3.47187	0.694733	0.200103	0.014352	0.240973	26.6377	17.5178	15.7832	0.756762	3.53638	0.213993	0.996427	0.727094	2.50376	2.65238	2.87764	3.57201	4.37812	4.23305	3.61719	3.17631	2.98114	3.22566	4.03014	3.74978	0.322373	0.369234	0.160409	0.0866396	0.349985	1.01581	0.529955	0.438746	0.766573	0.196773	0.695068	0.417649
Wsb1	0.0817301	1	25.5652	18.0211	44.1429	7.0663	0.160078	0.00020736	0.0175413	24.1272	17.2014	17.1107	5.38479	44.7648	0.120291	0.932103	0.431355	48.5201	39.8507	40.1633	50.2489	53.3947	50.4617	41.7043	39.5911	36.076	37.3507	49.9088	40.4129	8.22218	0.487237	1.68172	1.43353	2.84192	0.337234	4.2444	0.0810109	1.05709	4.59957	0.371787	5.892
Rhou	4.03637e-06	0.000743324	23.7699	18.0381	28.5996	2.63145	0.09201	8.1e-07	0.00031824	23.7298	17.8308	18.0339	3.00774	28.7423	0.104645	0.997422	0.34171	28.1279	25.0503	24.4431	28.0951	31.7792	31.4244	28.3968	26.8642	28.473	29.5088	30.63	31.3134	0.173007	0.826949	1.16994	0.503901	1.39026	1.82661	0.243411	0.22061	1.05995	1.76321	0.476089	0.217896
Rgs4	1.19006e-05	0.00170092	27.5438	18.1224	3.01472	0.79513	0.26375	0.00017424	0.0153262	26.408	18.528	16.8385	0.644801	2.90331	0.222092	0.995298	0.521219	2.47433	2.30129	2.43248	2.89261	3.84811	4.36467	2.81662	2.45021	2.4957	2.7056	3.12316	3.52112	0.548877	0.0887692	0.0276994	0.328397	0.590781	0.558208	0.579863	0.25317	0.199823	0.0706763	0.538644	0.266761
S1pr3	0.0290338	0.621609	24.778	18.163	257.85	20.8771	0.080966	0.00057121	0.0360678	23.3539	16.993	17.4631	16.2401	255.777	0.0634934	0.878242	0.459284	275.772	237.635	241.816	279.837	293.829	268.76	259.795	243.764	235.67	249.304	268.831	241.233	18.1823	2.74299	8.26307	21.867	5.36859	6.47933	8.1088	1.17555	0.333174	6.34766	14.3562	12.4953
Pim1	2.17667e-07	7.99143e-05	27.5438	18.2313	10.6302	3.36353	0.316414	4e-08	1.81333e-05	26.3966	18.0015	16.3671	3.39727	10.8724	0.312466	0.997937	0.304539	7.81258	6.56497	7.46771	10.6896	15.4661	14.0425	11.606	8.92236	8.04916	9.45454	12.5792	11.5773	0.498628	0.190958	0.835874	0.578264	2.04135	0.728576	1.15152	0.139331	0.797012	0.636767	0.500246	2.07114
Dtx4	0.000652984	0.0400772	25.939	18.2545	76.7026	5.43783	0.0708949	0.00025921	0.0210222	24.347	18.006	17.7493	4.55356	76.6546	0.0594036	0.995624	0.535971	80.2252	72.3598	73.3464	79.6315	83.5295	80.8593	77.0404	72.1954	70.4753	73.4868	79.4048	76.6324	4.35078	0.340042	0.112925	2.68514	0.282488	4.11685	2.00596	0.68309	3.72248	2.39948	5.17286	0.979079
Ddit4l	6.66565e-07	0.000173297	23.982	18.2915	91.2495	10.7305	0.117596	1e-08	4.91111e-06	24.3993	18.0683	17.7725	9.1552	90.758	0.100875	0.999062	0.307794	95.6924	86.7787	83.585	94.9706	100.987	103.109	87.607	81.514	80.9839	87.7	95.932	98.5721	7.07453	4.73352	2.29202	4.69046	2.49221	1.11948	1.47087	1.63251	1.71242	0.146972	0.496796	0.505987
Sncaip	7.0645e-05	0.00705612	27.0648	18.337	15.8617	2.02661	0.127767	0.00101124	0.0545083	26.2946	17.3966	15.8785	2.14548	15.9063	0.134882	0.998025	0.591828	13.147	13.4352	13.8216	16.4926	17.9225	18.0124	16.7709	14.5036	13.8986	16.0682	17.8066	16.9207	1.60523	1.14499	0.105027	1.11708	0.161856	2.87651	1.70689	0.141808	1.65584	0.537621	0.0864351	2.05441
Pfkfb3	6.11899e-07	0.000165499	26.9126	18.4113	43.489	10.8345	0.249133	1.444e-05	0.00225928	25.8654	17.9256	16.6328	11.2382	44.6796	0.251529	0.999375	0.450206	35.6921	29.5539	31.4666	44.9341	55.6397	54.694	46.9597	37.8728	34.4161	40.9523	52.3426	48.3218	2.49997	1.96789	2.48328	2.00961	4.18553	6.77322	6.89861	3.92873	4.9891	3.1826	3.69237	6.31303
2810029C07Rik	8.17016e-07	0.000200773	26.9126	18.4278	13.3722	2.91041	0.217647	2.56e-06	0.000620011	26.1642	17.6483	16.1885	3.06915	13.7529	0.223164	0.998011	0.393159	9.7935	9.36022	10.4471	13.0649	17.0894	16.6416	14.2788	11.3806	11.3469	13.8168	15.5627	15.3122	1.96836	1.1073	1.20885	0.446497	0.0952287	1.14153	2.08329	0.444487	0.353939	1.8063	0.842804	1.16422
Map1b	0.00518931	0.190732	23.6056	18.4478	48.6623	11.7643	0.241754	3.24e-06	0.000753726	24.1263	18.7592	18.661	9.18287	47.7449	0.192332	0.994684	0.401047	62.2344	48.0633	42.7811	53.4807	60.7503	57.7404	48.3349	38.995	32.9546	38.1121	52.168	51.0364	5.75919	1.67411	1.90264	5.65856	0.852063	8.50734	6.2582	4.04994	3.87985	1.47931	2.71248	1.75009
Pard6b	0.000301092	0.0220871	22.9917	18.4999	16.0043	1.69481	0.105898	0.00053361	0.0343063	22.0369	18.043	19.6503	1.71106	15.8108	0.108221	0.990971	0.566679	17.413	14.0956	14.1452	15.5717	18.3612	16.5351	16.4778	15.0654	14.5314	16.7897	17.4909	16.4994	1.60839	0.340368	1.37414	0.87109	0.159342	0.963588	0.288699	0.841046	0.53912	0.701847	1.39151	0.402086
Trim16	0.000246068	0.0188322	22.9555	18.5508	4.40231	0.49502	0.112445	0.00237169	0.0965685	22.0342	18.5124	20.164	0.483982	4.38537	0.110363	0.990462	0.62619	4.96767	4.11672	3.91222	4.45861	4.77204	4.79326	4.15666	4.16895	3.8899	4.38829	4.87213	4.60422	0.252052	0.2341	0.147831	0.209968	0.60516	0.152231	0.25915	0.391689	0.238408	0.0293908	0.19587	0.120237
6530411M01Rik	0.00146825	0.0737274	28	18.7224	2.13891	0.59317	0.277323	0.00010816	0.0111178	27.3269	18.6322	16.3638	0.515139	2.26124	0.227813	0.956793	0.496744	1.59902	1.41366	1.98533	1.72276	2.97929	2.83191	2.49555	1.54542	1.77351	2.18331	1.70066	2.69878	0.240711	0.111937	0.339471	0.500719	0.0495389	0.52077	0.281346	0.216044	0.00990238	0.259919	0.375102	0.347478
Klhl25	4.61122e-06	0.000831855	23.5251	18.7732	28.1981	5.94109	0.210691	1e-08	4.91111e-06	23.4871	18.6887	19.0968	4.87479	27.7398	0.175733	0.998818	0.190585	33.3964	22.9122	23.3873	28.0804	35.2245	33.6119	28.078	23.5316	23.7161	26.653	30.5214	30.9721	4.06489	0.851096	0.686046	0.643453	0.614734	0.312308	0.0619956	0.321835	0.158146	0.0471368	0.542654	1.78116
Rasgef1b	5.01005e-05	0.00543696	25.6056	18.9919	22.3512	2.80288	0.125402	3.481e-05	0.00442763	23.7851	18.2606	18.4257	2.86214	22.2155	0.128835	0.977273	0.443485	23.8682	18.8717	19.3042	23.8649	24.7457	25.279	23.1995	20.4475	19.3358	21.5579	24.5063	22.1304	1.77093	0.550725	0.30694	1.34704	1.38723	0.711027	1.41989	0.738625	0.928047	0.904364	0.654889	1.59983
Gramd3	5.07553e-06	0.000879709	28	19.0343	31.8695	5.09205	0.159778	2.25e-06	0.000620011	26.2103	18.3019	16.7585	4.88977	32.404	0.1509	0.994856	0.315759	32.1049	28.3484	28.393	34.02	37.6342	37.2314	33.5829	27.5292	25.0789	29.021	31.3813	31.7088	2.88112	0.550437	0.677185	2.79185	1.03993	1.41042	0.261807	0.37028	0.0198135	0.76268	1.51451	2.35051
Mdfic	9.60022e-05	0.00907606	27.7113	19.1201	37.1743	2.70983	0.0728954	8.649e-05	0.00943916	26.7741	18.3883	16.4831	3.3222	37.3557	0.0889341	0.961241	0.331565	32.6646	32.5582	34.0033	37.1952	38.6174	39.1449	39.1993	37.7384	34.873	36.7358	38.9221	41.7422	2.25847	0.169985	0.418775	3.21374	0.0386688	0.00923661	0.345797	0.720362	1.00554	0.320551	1.62025	1.31555
Map4k4	8.53151e-06	0.00128913	28	19.2108	115.135	10.0478	0.0872692	0.00013456	0.0128596	26.7774	18.782	16.8339	10.4395	115.836	0.0901235	0.974542	0.511482	114.023	104.904	107.825	117.644	125.581	127.761	116.119	112.753	104.868	105.72	117.375	115.355	0.260059	0.161689	1.04353	2.37028	2.06723	12.3736	7.30838	4.61914	8.11641	0.252148	0.720172	7.10347
Iffo2	0.00745372	0.250999	20.2782	19.2579	12.148	1.23302	0.1015	0.00034596	0.0254857	21.7687	19.3065	21.2854	1.14568	12.1209	0.094521	0.985518	0.548233	14.2694	12.6562	11.4588	12.2865	13.2195	12.9523	12.1399	10.8793	10.6253	11.4103	13.4386	12.0422	0.191762	0.0212895	0.389915	0.593936	0.276091	0.122935	0.884679	0.79351	0.749763	0.203167	1.42168	1.49846
Rnf144a	7.54962e-09	6.04376e-06	27.655	19.4273	23.9183	6.04031	0.252539	1e-08	4.91111e-06	26.7813	18.3958	16.4854	6.21136	24.4654	0.253884	0.999477	0.213348	19.4708	16.4794	17.6419	25.0196	30.0595	30.6435	25.9278	20.8971	18.3722	21.6829	26.1132	26.8463	1.00369	0.12241	0.442906	2.64071	0.561283	1.20227	3.14314	1.03317	0.866252	0.413349	0.355322	0.562019
Adra1b	0.00440483	0.17026	20	19.5031	1.36329	0.231481	0.169796	0.00023104	0.0191774	21.5111	18.8639	21.0464	0.239611	1.37226	0.174611	0.928739	0.51428	1.73951	1.40087	1.18311	1.40222	1.68044	1.51077	1.54206	1.05705	1.13794	1.34968	1.49783	1.15987	0.105593	0.176581	0.353856	0.0750127	0.0713698	0.216356	0.0139881	0.0842265	0.0258342	0.0193793	0.0411077	0.168606
Clock	5.06041e-06	0.000879709	26.2921	19.611	19.5788	4.83248	0.246822	0.00413449	0.135869	24.7886	19.006	18.4013	4.70505	19.1506	0.245687	0.999854	0.654688	21.6045	15.3766	14.8817	19.5293	23.1776	24.2783	20.2878	16.1502	14.2351	16.8267	21.5903	22.8957	3.80495	1.88555	0.558672	0.412017	1.38565	6.23287	4.66817	2.51187	2.61074	0.870603	1.42322	1.75209
Camk2d	0.000237739	0.0184342	23.5652	19.6177	29.0228	3.60932	0.124361	4.84e-06	0.0009724	23.4443	19.1726	19.627	3.17817	28.9257	0.109874	0.994414	0.416739	33.0669	29.1944	25.3452	29.9338	32.0025	32.4564	29.6875	26.7644	24.4263	26.5141	30.0731	30.233	4.49713	0.627372	0.100211	2.28471	0.923105	0.0866548	0.317471	0.23878	0.387013	2.3069	1.6554	0.620594
Mgat5	0.000139329	0.0123159	28	19.6754	61.577	7.90866	0.128435	0.00013456	0.0128596	27.2359	18.2917	16.1185	7.77305	61.6797	0.126023	0.949718	0.328826	49.6016	51.9792	55.525	65.4156	70.0775	70.9835	67.5113	61.5549	54.4682	56.4836	63.3443	61.2054	4.10021	1.10575	0.913433	3.70459	1.95407	4.72528	3.75295	2.09966	3.76358	0.0773408	1.72339	0.0553616
Pde9a	0.0178141	0.458947	25.6872	19.68	12.789	1.95128	0.152575	0.00028561	0.0224426	24.1423	19.0014	18.8893	1.73752	13.1037	0.132598	0.991014	0.539041	14.6779	11.6802	11.7738	13.057	14.6826	15.1186	13.7341	11.0264	9.94066	11.6045	13.064	12.0349	0.731437	0.311338	0.187931	2.04451	1.5841	1.39076	1.01442	1.22568	0.313511	0.430791	0.39954	0.864569
Gna14	1.71653e-07	6.89692e-05	28	19.7374	3.68941	1.04095	0.282145	1.156e-05	0.0019652	26.8869	19.1539	17.0974	0.766345	3.47142	0.220758	0.987541	0.302491	3.04786	2.79447	3.03534	3.33051	4.6455	5.49977	3.82754	2.98532	3.06479	2.90587	3.56266	4.02708	0.0827084	0.282462	0.197992	0.169768	0.582021	0.631296	0.093824	0.262717	0.165937	0.358894	0.0794948	0.0722166
Kbtbd11	4.6671e-10	8.02546e-07	23.8538	19.7557	16.6832	2.25713	0.135293	2.25e-06	0.000620011	23.9001	19.0374	19.117	2.27198	16.8323	0.134977	0.999887	0.378081	17.6071	14.9024	13.6333	16.439	18.4506	18.8097	17.4255	14.7811	15.0969	16.3738	18.2407	19.0206	0.675538	0.276253	0.266463	1.18161	0.276733	0.553229	0.579101	0.662126	0.339951	0.669532	1.15155	1.53838
Leo1	2.21494e-07	7.99143e-05	24.3377	19.7932	25.9545	5.73373	0.220914	2.25e-06	0.000620011	24.8114	19.4373	18.8017	5.86323	26.2041	0.223752	0.999151	0.388085	29.0841	20.4908	20.3342	24.5004	32.7846	32.8721	28.2538	22.8057	21.0156	23.4661	28.0427	27.6298	0.661961	1.17489	0.937823	1.75558	2.05066	2.19899	0.603896	0.308238	1.52027	1.00346	2.67349	5.97555
Rnft1	6.38385e-06	0.00105477	26.9126	19.831	19.6058	2.55409	0.130272	0.00025281	0.020693	25.7926	19.1585	17.827	2.5727	19.4167	0.132499	0.999122	0.53399	19.2151	18.3355	18.3999	19.0358	20.7429	22.7716	20.0707	18.0678	16.0966	17.4031	20.2722	22.2346	3.57886	0.40135	0.917985	0.238627	0.353592	1.17017	2.13697	0.360234	1.85098	0.443973	0.322084	0.654998
Adra1a	6.90581e-08	3.29967e-05	26.6667	19.8452	1.84452	0.743924	0.403316	1.225e-05	0.00206267	25.6421	18.8539	17.6465	0.750756	1.77556	0.422827	0.999891	0.440181	1.70758	1.09411	1.10895	1.6196	2.34287	2.80983	2.02525	1.2579	1.24065	1.47601	2.17844	2.47714	0.383546	0.196368	0.0919164	0.000539281	0.169652	0.642726	0.712008	0.0621577	0.229591	0.212514	0.16284	0.195439
Rnf180	3.85147e-05	0.00445033	26.1572	19.8822	48.0587	6.42538	0.133699	0.0455396	0.395541	24.6067	18.7756	18.3127	6.88055	48.0632	0.143156	0.999535	0.817265	48.2291	39.9193	41.6082	47.2473	51.8643	55.5713	50.7714	43.2932	41.5358	45.5936	54.642	51.7052	2.92807	4.27335	1.85175	0.821105	1.42168	8.70813	6.7818	5.64378	3.93063	1.87036	8.27851	5.80007
March3	3.8284e-05	0.00445033	20.3101	19.9124	10.151	1.14494	0.112791	4.624e-05	0.00552381	21.6962	20.287	22.4412	1.0147	10.112	0.100345	0.993129	0.479314	12.645	9.92926	9.39098	9.87984	10.399	11.137	10.4598	9.47381	8.97314	9.97918	11.101	10.1484	0.891059	0.764819	0.0316562	0.0833303	0.402836	0.226235	0.699088	0.456779	0.326115	0.503518	0.214191	1.04267
Syt17	0.0003457	0.0244465	27.5992	19.9161	14.6515	1.30785	0.0892637	0.091809	0.533942	26.9161	19.5047	17.3916	1.24774	14.5135	0.0859712	0.998145	0.891087	14.2317	13.3689	13.297	14.7125	15.403	16.1345	15.5677	13.9415	13.7548	13.461	15.0236	15.3671	0.417098	0.414385	1.02172	0.214163	0.752169	1.49255	1.03658	0.214255	0.387439	0.692336	1.53612	2.23722
Arntl	4.93372e-12	6.43708e-08	24.5235	19.9264	18.1949	16.7728	0.921842	0	0	25.3162	19.432	18.4217	16.1408	17.9585	0.898784	0.999687	0.110857	19.6597	3.82921	2.9799	10.3081	29.9625	43.4554	22.5393	7.7155	5.58173	10.9269	23.9988	33.8992	0.0103168	0.0429612	0.482789	0.350734	2.81472	2.12998	2.05472	0.490112	0.675445	0.333458	3.14041	4.95161
Rps6ka2	6.63732e-06	0.00105993	23.4065	19.9304	19.7699	3.15813	0.159744	1.44e-06	0.000480362	23.3161	19.5103	20.0826	2.90506	19.8969	0.146006	0.996017	0.281379	23.5536	17.5598	15.4278	18.8386	22.9008	22.0654	20.7461	18.5157	17.5344	18.1218	22.1758	21.1532	0.92153	0.216252	0.356952	0.455617	0.329545	1.99405	1.78471	0.317731	0.20366	0.0135883	0.613329	1.41861
Rasl11a	0.000408789	0.0280349	28	19.956	64.3227	8.52267	0.132499	0.00061504	0.0381541	25.7071	19.236	17.9586	9.52082	65.2702	0.145868	0.873303	0.327369	63.1488	52.7886	51.4038	64.7005	74.4688	73.5323	71.2941	63.0129	56.8449	62.6118	65.6642	60.2716	5.54379	0.806016	0.802658	0.838963	3.71195	2.19235	3.54053	1.15331	3.85822	3.58654	0.532543	2.55087
Mark3	0.000292668	0.0216488	23.7699	19.9587	61.6173	3.85586	0.0625775	0.00976144	0.20754	22.8301	19.3905	20.3841	3.7403	61.227	0.061089	0.974513	0.701952	62.927	58.2348	59.0112	60.9848	61.7493	68.8913	62.5059	60.5601	56.4035	60.5349	66.4076	63.2158	3.60431	0.756107	1.23763	2.17294	0.113217	4.417	2.18785	1.9996	3.01463	2.46774	3.04307	3.7987
Gm10561	4.09258e-06	0.000745905	28	19.9822	31.2987	6.47608	0.206912	2.56e-06	0.000620011	27.1824	19.1113	16.8739	6.43125	31.0928	0.20684	0.994293	0.376923	22.9029	23.6648	26.0872	30.0757	35.5337	41.3676	34.4608	30.1833	26.4442	28.5672	30.9704	35.5602	2.98205	1.65125	1.73602	1.06203	1.91975	2.34334	5.61215	0.943459	1.1099	2.82197	0.34262	2.22421
Gm25716	0.624451	1	22.5806	20	0.119191	0.207869	0.207869	0.00088804	0.049218	21.7183	19.4155	21.4553	0.175471	0.131845	1.33089	0.966204	0.585679	0.262814	0	0	0	0	0.604138	0	0	0	0	0.35644	0.338411	0.371675	0	0	0	0	0.102053	0	0	0	0	0.504082	0.478586
Polr1a	0.000107559	0.00995567	27.1164	20.0029	22.4812	2.25923	0.100494	7.921e-05	0.00891995	25.5709	19.6726	18.4641	2.65556	22.8316	0.11631	0.964693	0.481775	23.0105	19.37	19.6119	22.4066	24.6203	24.1663	24.5309	21.9132	20.4982	20.7936	24.0702	22.3752	0.708102	0.212983	0.00328278	0.314633	0.34667	2.51448	1.80547	1.22769	1.01322	0.337825	0.820737	1.57667
Gm13889	4.39693e-05	0.00488888	24.4299	20.0083	3.91225	0.933473	0.238603	7.29e-06	0.00137114	25.0829	19.6531	18.8046	1.12193	3.87933	0.289208	0.989456	0.415408	4.15862	2.63661	2.74036	3.31659	4.76012	5.32413	4.61129	3.03127	3.69483	4.02275	3.93321	4.6376	0.882796	0.655609	0.0168108	0.0106591	0.101295	1.40275	0.138552	0.0369494	0.325624	0.0817513	0.214496	0.378185
Acot1	0.000251161	0.019057	27.8831	20.0084	229.34	31.279	0.136387	0.00017956	0.0157159	26.8396	18.4373	16.4866	35.8802	229.671	0.156224	0.937538	0.447205	174.315	175.605	200.086	214.1	257.561	281.326	251.497	218.102	206.204	239.81	243.584	246.163	15.4859	8.18753	24.431	13.9752	15.8585	29.8812	13.8318	16.0696	21.8566	1.92474	15.2704	1.14598
Angptl4	2.1653e-07	7.99143e-05	23.0282	20.021	9.34697	2.13203	0.228098	0.000196	0.0168988	21.9773	19.5466	21.3455	2.08017	9.33715	0.222785	0.999548	0.525354	11.7727	8.73822	6.46413	8.32886	10.5896	10.9251	10.26	7.96482	7.41056	9.34575	10.6745	10.8597	1.38025	0.280321	0.303162	0.555674	0.638781	0.611871	1.80074	0.231392	0.0557872	0.569389	2.00685	1.98846
Pde1b	0.00122967	0.0647005	20.1218	20.0245	17.3522	2.82469	0.162786	0.00016384	0.0150869	22.4976	20.7477	22.1332	1.99504	17.2515	0.115645	0.940563	0.295705	25.3277	17.3042	14.4079	16.0681	18.9275	19.341	18.1948	16.66	15.1338	16.2404	18.3275	16.4486	1.27336	0.856227	0.231144	0.325137	2.11113	0.865435	0.451147	0.917761	0.248489	0.378384	1.44681	0.933812
Sapcd2	6.27639e-05	0.00641389	28	20.0266	1.19407	0.392022	0.328307	0.00042849	0.0291373	26.7013	19.8974	17.8844	0.410229	1.17349	0.349579	0.900364	0.27576	1.0488	0.725984	0.780073	1.02696	1.60585	1.76465	1.42121	1.23959	0.778673	1.09458	1.18304	1.05105	0.0224739	0.0567125	0.230284	0.0140886	0.0196503	0.195025	0.0590133	0.15598	0.0768164	0.075666	0.0499455	0.119174
Phc2	3.73973e-05	0.00437845	23.139	20.0402	53.5346	4.61722	0.0862474	1.764e-05	0.00255635	22.3067	18.5533	19.9617	5.86191	53.7829	0.108992	0.996359	0.457834	55.9567	46.8586	45.6078	49.6333	59.1314	59.6082	54.1668	50.8908	52.5075	56.406	57.5171	57.3283	4.83869	0.0945751	2.1028	1.67313	2.8273	1.70183	0.296154	2.02136	3.12133	2.75661	3.32553	1.05202
Brinp2	0.00343602	0.142016	26.069	20.0413	0.672731	0.135487	0.135487	0.00039204	0.0271814	24.7972	18.75	18.1472	0.157023	0.694615	0.226058	0.927819	0.553443	0.6387	0.465142	0.498199	0.671593	0.776582	0.900622	0.784879	0.596244	0.562115	0.643204	0.80799	0.620365	0.0614729	0.0338074	0.0416998	0.120958	0.0414803	0.247233	0.0505757	0.0498209	0.134013	0.0323397	0.0399325	0.0173208
Rftn2	1.99732e-06	0.000406657	28	20.0529	50.4374	7.67284	0.152126	4e-06	0.000841905	27.0054	18.9447	16.8364	7.95173	51.0552	0.155748	0.992979	0.284331	39.4517	39.081	42.447	48.3344	54.5566	61.1495	54.8401	49.1798	45.8821	48.3624	52.2407	58.4907	2.68483	1.41362	1.41279	0.350705	0.138843	4.0137	6.40545	0.0292757	0.613974	1.29998	1.84627	3.98812
Rpl7l1	0.00151472	0.0754333	23.4458	20.064	67.3451	2.05749	0.0305515	0.00073441	0.0438661	22.9087	19.735	20.6751	2.34345	67.5243	0.0347053	0.935056	0.578557	68.5239	66.0973	65.7158	64.5216	68.1105	70.1691	66.3839	66.0935	66.6789	67.4616	69.2065	71.4618	2.82801	3.16031	0.132364	0.231913	0.816403	0.425754	1.05077	1.9705	0.591601	1.88004	0.86082	0.103025
Gm26685	0.000187646	0.0151479	24.5709	20.0659	0.677586	0.243376	0.243376	0.00732736	0.185068	25.4923	19.3375	18.2055	0.28065	0.696457	0.402969	0.988674	0.684513	0.612428	0.324822	0.284399	0.646046	0.792244	0.928031	0.924722	0.589096	0.458277	0.72691	0.842112	0.955582	0.318551	0.169133	0.0179121	0.119664	0.075562	0.11347	0.307064	0.204552	0.080848	0.100062	0.309842	0.0756068
Kcna2	0.000635911	0.0393086	24.5235	20.0666	1.38337	0.390868	0.282549	0.0207072	0.286864	25.2791	18.628	17.6855	0.521449	1.33528	0.390517	0.982385	0.75014	1.07507	0.845052	0.864381	1.27316	1.56509	1.72578	1.7601	1.24206	0.971031	1.30423	2.046	1.86986	0.349665	0.335591	0.196287	0.0391998	0.301681	0.5692	0.477118	0.37525	0.306591	0.21796	0.171155	0.332121
Hr	0.000741076	0.0432392	28	20.0705	2.01154	0.414871	0.206245	0.00213444	0.0900642	26.763	18.2142	16.3337	0.406236	2.08809	0.194549	0.73822	0.261468	1.17449	1.24531	1.53763	2.04855	2.40881	2.54194	2.43826	2.12777	1.72629	1.91221	2.35159	1.99825	0.115505	0.00925026	0.234509	0.207932	0.0692342	0.152088	0.226741	0.0766938	0.103833	0.00786365	0.0407997	0.197331
Gpr19	1.83201e-05	0.00241295	26.7639	20.0706	27.6514	2.75312	0.0995652	5.041e-05	0.00578733	25.8125	18.2913	17.007	3.16779	27.7761	0.114047	0.971426	0.333437	24.662	21.6442	23.329	27.3704	29.3908	31.5021	29.5502	26.5748	26.4813	28.432	30.0209	30.2745	2.09911	0.628441	1.13949	1.18051	0.589273	0.292257	2.61417	0.693434	2.31028	0.342801	0.147096	0.0465831
Frmpd1	8.08203e-05	0.00780777	27.4888	20.0822	4.44774	0.606598	0.136383	3.481e-05	0.00442763	26.7767	18.6863	16.7486	0.610302	4.57685	0.133345	0.977935	0.365766	3.56564	3.45247	3.6177	4.10096	5.11921	5.10905	4.92158	4.39879	4.09913	4.38419	4.92592	4.89665	0.0548286	0.0141804	0.162475	0.219041	0.26463	0.328411	0.479465	0.359073	0.0856158	0.301574	0.145134	0.29701
Mrln	0.0195958	0.4825	27.8831	20.1297	0.762269	0.279543	0.279543	0.00028224	0.0223767	26.885	20.0876	17.932	0.280413	0.778515	0.36019	0.92075	0.461816	0.384096	0.569576	0.492463	0.569602	0.784847	1.29866	1.0909	0.52317	0.620635	0.638405	0.838559	0.905608	0.10258	0.10485	0.0625819	0.046345	0.361419	0.0625927	0.0677331	0.170557	0.217806	0.0775284	0.184955	0.0259646
Kctd5	6.08729e-07	0.000165499	24.2921	20.1411	45.6612	4.11003	0.0900116	4.84e-06	0.0009724	24.7133	20.1835	19.601	4.56169	45.9087	0.0993643	0.999008	0.417818	46.8724	40.8451	40.8374	43.602	46.2599	50.9828	48.5668	43.97	43.302	44.3539	48.3511	50.6277	0.957643	0.734829	0.394952	0.761638	1.48841	2.84273	2.11543	0.348183	1.42587	1.61696	1.70658	2.92863
Srrm4	1.15414e-05	0.00167246	26.8627	20.1437	1.10636	0.294798	0.266457	0.00023104	0.0191774	26.1709	19.9191	18.2668	0.284602	1.11476	0.255303	0.987082	0.531458	1.09052	0.639675	0.66171	1.02136	1.26139	1.41401	1.27476	1.04161	1.00154	0.90169	1.30811	1.31995	0.126157	0.0540799	0.0656925	0.156513	0.0480832	0.370339	0.194446	0.139558	0.153267	0.042088	0.0915609	0.171361
Cmtm6	1.65455e-05	0.00225006	25.0137	20.1518	80.5346	6.70909	0.083307	2.56e-06	0.000620011	26.3797	19.0779	17.3569	8.25065	81.8515	0.1008	0.994152	0.343406	73.3306	69.9754	70.7961	77.2947	84.4723	89.4681	85.4883	79.261	77.6684	78.9704	87.4611	91.1921	3.49329	0.293388	1.99507	3.40367	2.19973	4.00089	3.39927	2.28389	1.9314	3.21415	1.80491	1.44425
Fpgs	0.00936092	0.297647	20.3101	20.1564	11.0091	1.19538	0.108581	0.00045796	0.0304388	22.8079	21.1543	22.2599	0.880774	10.9639	0.0803339	0.896724	0.395824	14.355	10.8728	10.0591	10.0026	11.5365	12.2187	11.1432	10.7937	10.5256	10.1369	11.6274	10.7088	1.62874	0.062216	1.10447	0.208939	0.191029	0.344351	1.40991	0.309428	0.125819	0.121828	0.162479	0.0791317
Ipo9	0.592555	1	23.982	20.2718	52.59	1.97602	0.0375741	0.00064516	0.0394686	25.0374	19.7947	18.9745	1.67079	52.2513	0.0319761	0.868799	0.54331	55.59	54.5392	51.769	53.6521	55.6213	53.608	53.1518	51.3904	49.0499	49.3155	51.9873	52.8005	0.689004	0.222512	0.151153	0.782192	0.656077	3.55606	2.25469	1.93713	2.66064	0.0896579	0.561403	0.350747
Lingo1	5.2645e-06	0.000903603	28	20.3544	12.5582	3.03458	0.241641	2.025e-05	0.00291073	27.1618	20.5291	18.1394	3.24388	12.7015	0.255393	0.983297	0.296629	9.88443	8.85496	9.19321	10.3555	13.6346	16.5172	15.8589	12.553	10.5314	11.4651	12.8872	14.1812	1.70785	0.277944	0.450881	0.753751	1.40613	0.235017	0.810503	0.0424539	0.158223	1.43789	0.380921	1.37565
C030037D09Rik	0.000195109	0.0156078	27.2735	20.3607	2.88796	0.352994	0.12223	1.681e-05	0.0024562	26.6007	19.5124	17.6047	0.366263	2.92847	0.12507	0.985028	0.456776	2.53241	2.25736	2.36509	2.70736	3.03389	3.21806	3.20409	2.94595	2.7042	2.78931	3.15052	3.32431	0.0640285	0.0836355	0.197306	0.0672754	0.470616	0.40549	0.0315347	0.0531798	0.092874	0.314217	0.0390911	0.102114
Mafk	0.000181374	0.0148449	23.8538	20.4218	34.0981	2.9966	0.0878819	9.604e-05	0.0102288	23.9574	20.1936	20.2295	3.13269	33.863	0.0925109	0.958641	0.377508	35.5688	29.3627	28.1104	31.0598	35.305	35.8965	35.4243	34.6354	33.6176	34.1625	37.9346	39.2062	3.00688	0.981784	0.579709	2.00773	0.162005	1.81408	0.281517	0.864339	0.274935	1.34717	1.54379	1.93254
Cpped1	0.000370083	0.0256576	22.9917	20.4446	60.0782	3.02544	0.0503584	0.000324	0.024543	22.8773	19.9331	20.9113	2.43868	59.6835	0.0408602	0.913094	0.456359	66.6965	59.7352	57.1401	60.0907	62.2562	60.5062	60.5351	57.6176	57.2248	57.8858	62.2269	62.0494	0.566966	0.11734	0.913622	2.34528	2.65121	1.91586	0.163879	0.487467	0.720493	1.51277	2.43842	1.33865
Cdc42se2	0.0573236	0.945357	23.1018	20.5067	99.2342	4.58834	0.0462374	0.00035344	0.0259287	23.0309	19.2734	20.0844	3.55527	99.5565	0.0357111	0.909718	0.375706	107.608	101.95	96.0604	100.636	104.347	102.991	98.8304	97.9838	90.4306	94.9688	100.418	99.1624	0.168511	1.27581	0.0866499	2.49332	0.995348	0.125796	2.638	0.654479	3.1991	1.44385	2.74004	4.65444
Trim9	0.00674985	0.233068	26.6186	20.5513	5.81916	1.0473	0.179974	1.024e-05	0.00181043	25.1409	19.7931	18.8949	0.814149	5.86409	0.138836	0.995621	0.434414	6.9808	5.57015	5.14343	5.79049	7.05842	6.68595	6.2594	4.86701	4.49675	4.60456	5.44261	5.81459	0.509712	0.171987	0.295979	0.135735	0.31372	0.74646	0.792836	0.340165	0.568017	0.177027	0.183585	0.352195
Sipa1l3	0.00407067	0.162088	25.982	20.6716	25.9227	3.90368	0.150589	0.00035721	0.0259896	23.861	19.3512	19.4639	3.28145	25.4658	0.128857	0.971444	0.549246	31.487	23.1402	22.2682	25.5129	30.9587	28.6537	27.2586	23.9672	20.7955	22.3209	26.7658	24.9408	2.2836	0.507583	0.58552	0.655205	1.95653	5.14509	3.76611	2.69484	1.65842	0.588898	1.10804	1.78132
Mgll	1.88685e-05	0.00245276	27.7681	20.7792	8.80146	1.39089	0.15803	4.761e-05	0.00557447	26.5508	19.9339	18.0188	1.24816	8.74554	0.142719	0.97262	0.332427	9.37268	7.7749	7.60544	8.93565	9.53274	11.1016	9.2648	7.98291	7.5096	7.53007	8.26394	8.66457	0.744493	0.136473	0.242573	0.248455	0.0400074	0.148996	0.782413	0.441242	0.0458821	0.543484	0.331948	0.592398
Slc12a8	0.00429534	0.166895	23.2521	20.7934	7.51904	0.936332	0.124528	0.00038416	0.0269522	22.2731	20.3135	21.8885	1.00489	7.29607	0.13773	0.905462	0.460099	8.1024	6.58376	5.64	6.59318	7.39713	7.59046	7.80496	7.24802	7.13447	7.70517	9.68621	9.28841	0.344841	0.67413	0.169038	0.0968489	0.200741	1.00607	1.32918	0.311416	1.0241	0.789991	0.184554	0.0449324
Scube3	0.00380571	0.155384	26.8627	20.8204	62.8048	8.615	0.137171	1.681e-05	0.0024562	24.8012	20.0227	19.3758	8.46939	61.9436	0.136727	0.985773	0.453845	75.2585	56.4964	56.4653	61.2254	70.9258	70.7131	68.0038	57.9259	52.5227	54.1226	61.0659	59.139	1.03418	1.7138	3.73608	0.108321	3.03075	8.41887	4.08664	0.90669	2.14872	3.80029	5.52953	5.92483
Habp4	0.0121297	0.355035	22.9555	20.8331	64.4891	4.60291	0.071375	0.00044521	0.0299289	22.0768	21.4954	23.368	3.87834	62.8247	0.0617328	0.897565	0.438188	77.2864	68.0677	64.7601	61.7419	65.8176	66.8604	64.914	60.4762	58.3823	60.1819	63.699	65.7537	2.25482	6.44427	4.88069	0.0636102	2.67484	2.31701	3.13249	1.22712	0.52749	0.0544147	2.01655	0.193873
Elmo2	0.000163147	0.0140013	22.8483	20.8613	41.4912	3.84109	0.092576	4.096e-05	0.00496009	22.6016	20.3076	21.5641	3.08644	40.7833	0.075679	0.975145	0.280373	50.5864	41.6689	37.7258	40.499	44.3486	43.7469	42.4518	39.3884	37.5829	38.575	42.844	41.7495	1.41538	0.429384	1.0479	0.912278	0.887849	2.18281	1.08769	0.6192	0.933557	0.823381	0.191346	1.52757
Nr2c2ap	0.0129009	0.367862	23.1765	20.8791	37.0381	2.91027	0.078575	0.00043264	0.0293068	22.5503	20.3178	21.624	3.23164	37.3724	0.0864714	0.899065	0.442514	39.6145	32.6083	31.0915	32.9384	36.3387	38.2961	39.4314	36.8418	36.983	38.5684	42.5043	41.3417	0.55977	1.71331	0.242257	2.45809	2.14573	1.84243	1.49337	2.72861	0.409603	1.79395	1.72851	1.60032
Dapk1	0.000297323	0.0219016	26.4299	20.8879	30.5744	4.66053	0.152432	0.0486202	0.406818	24.7869	19.8795	19.2483	4.76275	30.0553	0.158466	0.997806	0.82321	34.5933	26.7693	25.4867	29.4071	34.81	34.9469	32.1959	28.8651	25.1729	26.9975	31.3686	31.6969	1.83484	2.05317	1.36572	1.51191	2.70282	5.52117	4.66944	3.60716	3.13678	1.20043	3.16824	4.79575
Npas2	2.95853e-05	0.00355809	23.8538	20.9025	0.916111	0.464477	0.464477	9e-08	3.78857e-05	23.4702	20.1642	20.6194	0.397111	0.920927	0.431208	0.997586	0.233319	1.73542	0.71122	0.60231	0.767543	1.17156	1.40023	1.18696	0.5812	0.415951	0.596515	0.871306	1.01143	0.100786	0.114762	0.000902131	0.137507	0.014336	0.133145	0.0736973	0.078603	0.0644939	0.0893711	0.143128	0.144116
Glipr2	2.60637e-05	0.00322224	23.7699	20.9077	95.0036	13.6187	0.14335	4e-06	0.000841905	23.5357	20.5516	20.957	12.0867	96.728	0.124956	0.998939	0.41274	111.562	97.3561	88.2587	90.0316	102.007	112.297	102.974	84.5493	79.123	81.4085	94.7632	99.7935	4.52258	4.94653	0.355731	1.29739	2.35865	6.81291	6.49291	4.69949	9.32179	4.8809	3.9935	4.76869
Sema5b	0.00027206	0.0203731	26.4765	20.9294	27.1288	3.7116	0.136814	2.56e-06	0.000620011	24.7945	20.2848	19.6348	3.37528	27.1132	0.124488	0.994543	0.365821	31.0508	26.4978	25.1549	25.462	30.4616	30.4285	29.3484	25.7031	21.4086	23.1134	26.403	26.861	3.29477	2.37121	1.88026	0.533683	0.105063	0.964292	0.760879	1.292	0.499698	0.0653731	1.32161	0.12988
Ccdc60	0.000109771	0.0101075	26.7639	20.9326	6.94264	1.74412	0.251219	1.96e-06	0.000587336	25.8436	20.924	19.4314	1.76476	7.13093	0.24748	0.995141	0.204637	5.9945	4.95697	4.67541	4.77768	6.98645	8.86926	8.93624	6.8501	5.993	6.45521	7.8184	8.90947	0.744257	0.0188919	0.435739	0.282713	0.179934	0.000996788	0.991736	0.172126	0.0485073	0.284593	0.134753	0.607977
Rras2	0.00139477	0.0708569	23.0649	20.9433	41.6154	4.24736	0.102062	0.00016641	0.0152442	22.5058	20.434	21.7906	4.06128	41.3166	0.0982966	0.992163	0.517659	50.8917	41.159	37.2005	40.5337	43.3946	45.3639	43.6737	39.0055	37.2551	39.8349	41.807	42.3485	0.709007	4.03638	0.7072	1.1193	0.35506	2.30441	5.26061	2.70766	1.49209	0.849912	3.28445	0.653108
Arsi	6.75908e-05	0.00678942	24.3377	20.9465	19.1186	5.47765	0.286509	3.61e-06	0.00078796	23.8755	20.1452	20.2503	5.24062	19.5537	0.268012	0.993355	0.274634	29.007	16.7782	14.9069	17.8272	22.4217	25.5649	22.7535	15.6823	13.658	14.0665	18.6505	17.6807	4.43389	1.67511	0.370062	1.27548	1.98006	0.61291	1.58056	0.208883	0.543049	0.132938	0.338688	2.80169
Adamts4	0.000410716	0.0280349	24.3377	20.9465	1.2701	0.236642	0.186317	0.00535824	0.154794	24.7932	20.3951	19.7426	0.233969	1.23252	0.18983	0.99072	0.668976	1.54741	1.09122	0.980297	1.22533	1.42947	1.44748	1.37575	1.13434	1.14061	1.07142	1.2619	1.52886	0.0185901	0.113285	0.0492716	0.11886	0.0840847	0.165201	0.238732	0.0172086	0.149791	0.0978963	0.351616	0.135076
Amigo1	0.000186932	0.0151479	28	20.9864	17.4084	1.21144	0.0695891	0.00082369	0.0472819	27.2463	19.1954	16.9083	1.19861	17.4949	0.0685123	0.84802	0.308066	15.3663	16.6601	16.5049	17.5125	18.7155	18.6472	18.6706	17.5728	16.2056	16.1782	17.2152	17.9766	0.129537	0.0933124	0.0342987	0.683201	0.237033	0.265032	0.561276	0.00172349	0.422864	0.551003	0.144043	0.973115
Efnb1	0.000689987	0.0414784	23.8962	20.9937	29.4279	3.05054	0.103661	1.296e-05	0.00210214	23.2551	21.0636	21.7384	2.88369	29.1014	0.0990909	0.992928	0.44119	35.9038	30.2437	26.4476	27.8385	31.3522	31.8514	31.1045	28.1527	25.9785	27.4271	28.5574	29.2126	2.03675	1.79403	2.86805	0.48206	1.12963	0.568208	0.438975	1.07099	1.28168	0.150662	0.517081	2.34926
A130057D12Rik	0.00104219	0.056692	26.7639	21.0158	6.73309	1.73918	0.258303	0.00079524	0.0465558	24.6024	20.3963	19.8969	1.8206	6.56106	0.277486	0.890067	0.581891	7.97998	5.67015	4.14577	5.28459	9.34499	8.09455	7.67726	6.01998	5.79693	5.17408	7.07521	6.4432	0.507398	0.0372779	0.539158	1.25566	0.0529429	1.51925	1.11442	1.01025	0.73452	0.246705	2.43387	1.01124
Tmeff2	0.000175004	0.0145253	27.0137	21.0178	16.0757	1.99249	0.123944	0.00012321	0.012377	25.1662	20.7713	19.8088	1.8998	15.9388	0.119193	0.993906	0.50824	18.2774	14.1407	13.8273	15.4306	17.1847	17.9534	17.9183	15.1755	13.9967	15.359	15.2959	15.9738	0.515332	0.174884	1.62666	0.198525	1.24788	1.11888	0.241708	0.589141	0.858959	1.29358	0.62599	1.24043
Mmp14	0.000682922	0.0412061	24.4765	21.0255	83.5751	13.0095	0.155663	4.84e-06	0.0009724	24.0194	20.7905	20.7737	12.8621	85.3568	0.150687	0.996897	0.416152	107.339	83.5367	73.9247	77.7435	90.4743	99.2023	92.9944	77.7113	69.242	72.3163	78.7951	79.0609	9.63212	7.71066	8.77039	5.82568	4.39216	2.01337	1.02502	3.05177	1.56704	2.02284	4.28051	7.6766
Sema3e	0.00014053	0.0123603	26.3377	21.0356	12.1244	2.83509	0.233834	0.00737881	0.185837	24.3085	20.6649	20.4026	2.61975	11.9527	0.219177	0.999079	0.684955	15.5456	10.9224	9.60825	10.5785	13.2663	15.4385	13.4892	10.7229	9.3897	9.41449	11.7843	12.4588	1.79024	0.898387	0.194422	0.282841	1.45611	2.5368	3.70077	1.19041	1.99473	1.0017	0.771099	2.11273
Get4	0.000135994	0.0120816	23.5652	21.0451	34.9872	3.49157	0.0997956	0.00026244	0.0210906	23.2243	20.8491	21.5455	2.69639	34.3806	0.0784277	0.988596	0.536471	42.6422	32.9459	31.9342	32.0845	36.4776	38.3388	36.0547	33.0339	33.0145	33.5406	34.7247	36.7372	6.1753	3.16945	2.10786	0.0551253	1.94174	0.0407091	0.536844	1.56945	0.22891	0.753638	0.501993	3.07217
Inpp5a	6.41977e-05	0.00648543	22.7431	21.0578	29.0506	2.9719	0.102301	5.041e-05	0.00578733	22.493	20.9387	22.3415	2.2526	28.6151	0.0787207	0.971566	0.437223	36.7099	27.7232	26.2714	27.6866	29.0229	31.2066	30.5941	27.2216	26.3858	28.7746	29.6215	30.0242	3.93633	2.59649	0.876683	0.283394	1.43532	1.054	0.895897	1.52446	0.167621	1.17876	0.413813	0.499002
Fgd3	7.8628e-09	6.04376e-06	26.1572	21.0729	46.9291	11.681	0.248908	1e-08	4.91111e-06	24.2457	20.4775	20.27	11.8792	45.4069	0.261617	0.999328	0.104717	61.6046	40.2937	33.1659	41.6275	52.366	57.1652	52.6998	43.0948	34.6852	37.8153	47.688	49.9458	1.9312	1.30656	0.412217	0.345053	0.0832389	4.07461	0.692156	0.15876	1.15485	0.0633151	0.958555	0.134217
Traf1	0.000168043	0.0142828	28	21.1258	120.278	18.2172	0.151459	0.00088804	0.049218	27.3294	20.8363	18.2979	18.6545	122.289	0.152544	0.898151	0.585426	115.722	101.231	98.8048	117.779	135.061	141.02	140.419	122.722	106.214	109.099	116.116	109.993	6.8129	9.84411	5.65018	7.95641	11.8325	13.3947	17.4352	3.09061	6.25503	10.2366	0.547029	8.22513
Akap12	3.55429e-06	0.000668471	23.6056	21.1522	53.918	7.93607	0.147188	0.00267289	0.105249	23.5156	21.1369	21.5723	7.73901	53.9393	0.143476	0.998139	0.631696	64.0369	52.7834	44.5489	48.2471	57.9059	58.2524	57.9306	52.0532	47.9712	46.8467	58.7049	60.7432	1.72769	3.09194	2.56767	3.10626	2.3858	9.70717	3.66432	5.77294	6.56768	0.317992	1.42563	7.16931
Sema7a	2.97694e-07	9.47267e-05	23.5251	21.1627	2.11953	0.931758	0.439606	1e-06	0.000346667	23.1512	21.3509	22.1337	0.779052	2.04696	0.38059	0.996874	0.356864	3.98295	1.86173	1.10007	1.56714	2.34116	2.5501	2.76153	1.82825	1.23496	1.60838	2.35157	2.52885	0.472602	0.395485	0.459852	0.348184	0.483438	0.286727	0.155149	0.193623	0.0407488	0.0035951	0.0145281	0.531145
Lpcat3	4.34053e-05	0.00485672	26.6186	21.215	84.2299	6.07399	0.072112	0.0354946	0.357983	25.2616	21.3357	20.2702	6.20063	84.3291	0.0735289	0.999409	0.792417	89.0642	81.939	78.3658	81.1711	86.378	88.8553	91.0283	82.468	77.7185	78.8678	83.867	85.6526	4.757	1.53536	3.37412	5.77744	5.20462	5.94756	3.55409	2.59486	1.54115	4.24516	0.610346	3.24673
Upp1	0.000232198	0.0180838	22.9555	21.243	3.45176	0.795796	0.230548	0.00011664	0.011784	22.1927	20.5682	22.2431	0.883163	3.41122	0.2589	0.995234	0.506061	4.64954	2.90443	2.32372	2.50326	3.60598	3.91421	3.85451	3.0094	3.1671	3.51128	4.16671	4.3258	1.5184	0.0215743	0.107296	0.0615417	0.0486028	0.417392	0.105701	0.126505	0.951358	0.328479	0.274397	0.463369
4732471J01Rik	1.70036e-05	0.00228028	23.939	21.246	23.4611	3.00197	0.127955	1.6e-05	0.00241778	24.3129	20.4419	20.1788	3.07212	23.8466	0.128829	0.989785	0.452461	26.6834	18.7899	18.5624	22.0932	23.7983	26.89	25.6415	23.4337	21.4821	23.3293	25.6183	25.8482	2.33012	1.29462	2.85453	0.741523	1.33132	0.556957	0.827868	1.11658	0.710221	1.18655	0.634943	1.85442
Plat	4.54192e-07	0.000131634	27.0137	21.354	209.749	42.4463	0.202367	0.00318096	0.115957	26.2384	21.6138	19.7699	44.6604	209.46	0.213217	0.9999	0.642353	233.169	186.077	164.241	178.366	221.442	253.632	246.757	205.809	174.296	178.979	196.713	222.49	13.5095	13.1088	10.1036	8.13019	15.945	35.798	20.9429	11.8584	25.747	22.2135	17.5038	36.3386
Camk4	1.01023e-09	1.19066e-06	26.6186	21.363	1.98066	0.929581	0.46933	1e-06	0.000346667	25.4434	21.2931	20.0852	0.909137	1.95419	0.465225	0.999859	0.346345	2.40869	1.37332	1.03855	1.36744	1.9949	3.04916	2.71845	1.75229	1.18484	1.25312	1.96424	2.54034	0.486911	0.0375529	0.0558193	0.15754	0.321385	0.827404	0.451594	0.0444861	0.155601	0.0414905	0.0961242	0.105122
Lipe	4.05525e-05	0.00456642	26.6186	21.3842	9.08456	1.19981	0.132071	7.84e-06	0.00144387	25.6026	20.6675	19.3738	1.28454	8.94232	0.143648	0.996333	0.430122	9.37534	7.23788	7.44419	7.9509	9.48234	10.4974	9.73357	9.19992	8.42465	8.70505	9.65002	10.0226	0.716236	0.123533	0.641439	0.282487	0.0570461	1.17349	0.124947	0.761386	0.63314	0.195686	0.210352	0.40341
Aadat	3.00606e-07	9.47267e-05	27.3803	21.4058	2.63846	0.729282	0.276404	5.776e-05	0.00654613	26.5749	21.8333	19.7178	0.712582	2.62666	0.271288	0.996533	0.483508	2.94732	2.02575	1.56676	2.39409	2.78775	3.25344	3.26166	2.85044	1.9369	2.30779	2.32704	2.92748	0.175025	0.198118	0.12683	0.424281	0.0157936	0.409949	0.000289658	0.493176	0.160425	0.377366	0.58135	0.16612
Pmm1	7.16941e-06	0.00112166	26.6667	21.4329	124.239	24.8062	0.199665	1.6e-05	0.00241778	25.8663	20.9341	19.4236	26.503	123.734	0.214193	0.999072	0.4516	123.371	97.0034	86.3278	100.567	131.104	149.939	146.262	123.504	109.801	116.548	133.867	143.958	17.9539	5.47363	3.02729	2.8869	2.42428	10.0002	17.2227	17.4429	15.6147	8.30761	5.91189	4.72512
Kcnk1	2.68769e-05	0.00327694	27.5438	21.4523	69.01	7.45815	0.108073	3.136e-05	0.0040768	26.7898	21.0595	18.8664	7.89559	69.046	0.114353	0.97856	0.382104	66.9792	59.6201	56.2308	64.3967	72.5006	75.1879	77.7213	70.6411	64.9929	66.3462	71.6157	71.5276	5.68899	0.58318	2.70541	0.0131578	0.850123	1.56691	0.478361	2.03748	2.31086	2.96976	5.20964	4.36074
Slco3a1	0.000257849	0.0193979	27.4343	21.4627	8.43835	0.800479	0.094862	0.00017424	0.0153262	26.8742	20.9266	18.6886	0.819777	8.44302	0.0970952	0.991979	0.52323	8.36344	7.09364	7.46289	7.72558	8.90634	9.25109	9.05266	8.61565	8.13401	7.99593	8.72835	8.87731	0.797304	0.116438	0.120583	0.180636	0.00519242	0.285352	0.450399	0.170737	0.17754	0.850598	0.771389	0.32155
Sox3	6.23527e-05	0.00640892	24.2921	21.466	2.30735	0.582485	0.252448	0.00069696	0.0420555	24.7036	20.7664	20.1749	0.659493	2.37845	0.277278	0.996895	0.577408	2.10632	1.93377	1.49018	1.68256	2.38739	3.02197	3.0028	2.20666	1.88184	2.17131	2.77545	3.00077	0.507918	0.189797	0.361972	0.305278	0.0783328	0.446857	0.65509	0.163432	0.117258	0.374199	0.167769	0.339026
Slc20a2	1.08306e-06	0.000242373	23.939	21.4719	37.1588	4.66539	0.125553	0.00010609	0.0109688	24.1672	21.3039	21.1565	4.63055	37.2635	0.124265	0.999766	0.501656	41.791	34.9371	32.2048	33.4355	38.4544	39.975	42.3673	36.2724	33.3867	33.8677	39.5993	40.7047	3.38185	0.975841	0.688059	0.038693	0.357162	1.36041	2.21905	1.21016	0.42068	3.76175	1.17817	6.3254
1810034E14Rik	3.08634e-05	0.00368672	22.9917	21.5852	1.42319	0.272957	0.191792	0.0001	0.0105868	21.7881	21.729	23.9349	0.30678	1.41754	0.216417	0.991858	0.497962	1.66457	1.42023	1.22632	1.04096	1.46323	1.46769	1.69873	1.3391	1.10182	1.43125	1.58583	1.81826	0.00159931	0.0361644	0.145149	0.0384434	0.263981	0.0917501	0.15228	0.0621531	0.179543	0.00119973	0.196998	0.241243
Scpep1	0.312574	1	24.3377	21.6163	956.973	99.0246	0.103477	4.096e-05	0.00496009	24.3093	20.4238	20.1639	83.1551	952.553	0.087297	0.975061	0.431339	1213.31	1034.04	926.176	965.062	1062.22	1071.42	966.435	882.328	816.537	792.101	855.125	906.775	0.315593	75.9341	25.2064	52.9539	75.7999	51.1508	85.2373	101.424	39.3103	47.6105	33.79	39.9738
Ncald	4.9309e-08	2.4376e-05	24.2921	21.6598	50.3736	6.11853	0.121463	1e-08	4.91111e-06	24.7038	21.0378	20.4384	6.48159	50.3623	0.128699	0.999805	0.300241	51.3143	46.0512	43.3312	45.1285	50.9175	55.9363	56.9225	49.7226	46.084	46.6204	54.3191	58.5208	2.73391	0.909421	0.350557	1.22161	1.47443	4.26681	0.375192	0.0248938	1.28555	1.69925	2.62664	1.39149
Syt6	0.120397	1	26.7151	21.7701	1.47147	0.205581	0.139712	0.00042849	0.0291373	25.3483	20.7037	19.6025	0.193555	1.50454	0.128647	0.900462	0.406767	1.76017	1.66371	1.34533	1.53199	1.64221	1.71329	1.61887	1.35353	1.14439	1.04529	1.3487	1.25801	0.228774	0.0787275	0.10008	0.0749964	0.0653664	0.108921	0.0271156	0.161722	0.0259806	0.0252727	0.0733561	0.177172
Aqp9	7.89016e-06	0.0012025	26.5709	21.8307	1.21163	0.437679	0.361231	8.1e-05	0.0090638	25.5715	21.4668	20.1476	0.46654	1.10379	0.422671	0.96419	0.264972	1.24123	0.799435	0.595935	0.825632	1.17013	1.82455	1.48248	1.42885	0.707262	1.08184	1.45665	1.40756	0.133019	0.0561727	0.209858	0.0777695	0.106936	0.0864332	0.086414	0.0257877	0.043071	0.0887814	0.251225	0.0258299
Sept9	0.0815182	1	23.8962	21.864	87.6763	11.1194	0.126823	0.000576	0.0362409	23.4427	20.9812	21.48	8.98133	87.4386	0.102716	0.985549	0.569786	115.858	93.133	81.9286	85.1536	95.4502	95.5433	94.2048	79.981	72.4277	73.6645	83.5404	84.1632	14.0747	13.0296	7.23783	3.11736	2.49259	4.85508	10.44	5.79868	6.62335	4.62949	5.51155	3.22604
Ccdc101	0.00608848	0.215276	24.5235	21.8757	13.1175	0.942133	0.0718228	0.000441	0.0297591	25.5338	21.7323	20.4268	0.941876	13.2512	0.0710786	0.943794	0.557923	14.6573	11.9292	12.2201	11.6292	13.6218	13.9846	13.3898	13.3501	13.0537	12.7303	12.9761	13.98	0.871097	0.0564771	0.925376	0.802855	0.132832	0.141146	0.848779	0.465426	0.898457	0.155845	0.588973	0.119527
Lta4h	0.0500558	0.861672	23.8962	21.9033	78.8851	3.89405	0.0493635	0.00039204	0.0271814	23.5785	21.4197	21.8026	3.80829	78.8791	0.0482801	0.90385	0.364114	86.4537	82.7962	78.6113	78.2391	79.1024	85.6825	81.8301	75.2795	72.3673	76.0683	74.2119	78.259	0.426631	0.0844515	1.23491	2.1914	1.03245	3.09072	2.3483	0.271562	0.674103	2.74953	0.457669	4.67487
Pbp2	9.52329e-05	0.00905174	23.3675	22.1676	6.05642	1.12089	0.185075	0.000324	0.024543	22.4575	22.1907	23.7149	0.989923	5.994	0.165152	0.938164	0.542748	8.42372	6.73343	5.11405	5.40893	6.04637	6.56946	6.09578	5.71338	5.19939	4.67681	6.16085	7.06521	0.428517	0.708126	0.172117	1.09107	0.907452	0.191416	1.57952	0.126422	0.363099	0.665819	0.269084	0.126313
Hspa5	0.00153074	0.0760167	27.1164	22.2189	443.327	40.2535	0.0907987	0.000484	0.0315761	25.2979	22.7407	21.5739	31.4734	437.304	0.0719714	0.889041	0.20184	546.817	450.35	395.165	408.921	467.291	463.271	460.439	442.077	416.719	409.082	393.448	418.413	16.407	6.71731	10.518	2.29186	0.742093	0.534529	6.68391	6.52786	11.1516	5.66907	10.6429	26.2331
6530402F18Rik	0.000303593	0.0221786	23.5251	22.4152	8.79597	0.823388	0.0936097	5.329e-05	0.0060785	23.0113	21.6977	22.63	0.909811	8.91735	0.102027	0.970829	0.392047	9.78746	7.94824	8.21516	8.20942	8.42728	8.89946	9.5909	8.42805	8.038	8.36483	9.7142	10.3636	0.774103	0.499686	0.559248	0.00870685	0.0618137	0.166567	0.149179	0.881662	0.161398	0.182967	0.230553	0.167716
Lpar2	5.90112e-05	0.00613682	28	22.6008	7.63374	0.654519	0.0857403	0.00833569	0.195977	27.1482	23.1904	20.5011	0.677171	7.59188	0.0891967	0.478918	0.387559	7.91682	7.8131	6.75393	7.29128	7.75942	8.80365	7.95323	7.79264	7.56311	6.82922	7.18332	6.97403	0.269333	0.274211	0.313135	0.237156	0.0645115	0.35105	0.187803	0.00256227	0.274419	0.382092	0.117522	0.233369
Nek7	0.00551431	0.200664	27.0137	22.7135	46.2586	3.78661	0.0818574	0.00030976	0.0238111	25.986	20.7482	19.1625	5.06977	46.555	0.108898	0.973812	0.542065	43.0004	41.6049	41.07	43.8031	44.9427	49.8392	50.2628	48.4358	42.1831	43.8127	48.8063	53.1711	5.2857	0.447119	0.401907	4.16733	0.517623	2.30639	2.73473	1.0333	1.06728	1.78597	2.32814	3.94106
Sctr	0.00408729	0.162088	28	22.8619	4.12734	0.97892	0.237179	0.000169	0.0153227	26.9645	21.2146	18.8823	0.97477	4.44541	0.219276	0.940092	0.32008	2.88626	2.88925	2.61084	3.14626	3.93591	5.33015	5.3888	4.48661	4.01716	3.88144	4.17911	5.14982	0.0473106	0.000507567	0.109401	0.429162	0.357225	0.421525	0.204794	0.986085	0.319785	0.136616	0.125738	0.603682
Nudt10	2.04439e-06	0.000406657	23.982	22.896	28.0727	4.59139	0.163554	3.61e-06	0.00078796	23.583	22.847	23.2511	4.38411	28.2128	0.155394	0.998165	0.408429	36.4031	31.0354	24.0917	23.7611	27.3192	32.2123	30.9561	27.0629	25.1206	24.3571	25.9983	29.3218	2.13509	0.482019	1.66032	0.884145	2.76158	0.28481	2.09512	2.84728	1.41131	2.4584	1.32515	0.807675
Nudt11	2.0702e-06	0.000406657	24.2468	22.9213	37.4946	4.14815	0.110633	1.296e-05	0.00210214	24.2935	22.8091	22.5336	3.93599	37.0408	0.106261	0.999106	0.445204	44.013	39.1288	33.797	33.5426	36.9197	42.1406	40.4994	37.6447	33.8953	35.3403	35.1463	38.3337	0.0663511	0.195375	0.982755	0.825682	1.44662	1.86787	2.10727	3.36027	2.03405	3.16454	0.837018	1.42265
S100a16	0.0225548	0.526051	24.5235	23.0876	131.051	15.5069	0.118328	1.96e-06	0.000587336	26.0662	22.3497	20.5782	16.4664	132.438	0.124333	0.995097	0.32841	129.076	115.454	98.4704	107.173	129.238	143.082	151.097	139.102	132.099	135.339	138.562	153.311	2.78151	11.0079	2.53202	3.77317	1.11844	6.33579	1.63679	8.40427	10.1048	2.36073	9.21041	6.51616
Hspb8	0.000250124	0.019057	23.8962	23.1708	485.455	52.2016	0.107531	2.401e-05	0.00329067	25.0398	22.502	21.5676	46.8988	493.48	0.0950369	0.981769	0.21704	538.429	425.881	394.037	401.789	466.48	514.722	531.027	508.469	487.429	497.624	516.224	558.819	11.2732	20.702	15.7548	5.73062	17.7418	3.41191	3.76683	8.28641	11.3775	2.34167	25.4378	14.6435
Lpin3	1.76875e-07	6.94881e-05	24.1572	23.3854	2.56469	0.635879	0.247936	2.56e-06	0.000620011	24.0439	22.648	22.6066	0.486053	2.4887	0.195304	0.994369	0.177438	4.1437	2.52341	1.92696	2.03556	2.40625	2.95557	2.94034	2.54701	2.12171	2.08593	2.49316	2.61498	0.0636804	0.00458061	0.109647	0.163405	0.056563	0.00256925	0.103951	0.225241	0.0589195	0.0801959	0.302655	0.101952
Igfbp3	2.01614e-05	0.00260171	23.982	23.6797	194.319	51.9398	0.267291	0.00036864	0.0264941	23.3569	0.260357	0.267525	37.3373	180.873	0.206428	0.908153	0.221631	355.679	232.443	167.957	153.915	173.645	202.963	209.735	183.366	152.871	139.531	168.571	196.705	2.62578	9.84364	7.71052	20.5818	17.8556	20.6601	2.73806	5.4115	13.959	10.5827	11.3664	28.9466
Slc25a48	7.53329e-06	0.0011581	23.939	23.6995	3.6317	0.889843	0.245021	0.00013456	0.0128596	24.2639	22.2878	22.0453	0.935987	3.6659	0.255322	0.997457	0.511186	4.8191	3.30236	2.39862	2.62286	3.53771	4.07096	4.68859	3.83498	2.9822	3.29297	3.97629	4.17639	1.06408	0.575247	0.417728	0.0727509	0.0696187	0.168485	0.402655	0.757235	0.748241	0.0576338	0.0918658	0.24158
Kirrel3	1.21632e-10	4.30066e-07	23.8538	23.7983	8.61537	2.69715	0.313062	2.56e-06	0.000620011	23.1943	23.0569	23.8579	2.3013	8.38442	0.274474	0.994006	0.206697	14.9601	9.82927	6.30604	6.04097	7.77953	9.18576	10.2844	8.56822	6.71947	6.36786	8.26222	9.49317	2.31515	0.771095	0.402209	0.373373	0.139257	0.154157	0.337977	0.68942	0.0915118	0.0497042	0.109547	0.689342
Gm12264	0.000940776	0.0523866	24.4765	23.8736	249.635	19.0476	0.0763018	0.00040401	0.0276856	24.8237	22.9337	22.1727	16.0572	247.363	0.0649136	0.974241	0.554296	292.661	248.044	224.881	230.513	244.68	266.286	256.038	251.673	249.946	232.764	247.406	253.564	28.2715	28.0063	12.1519	9.52834	2.72757	4.779	0.274773	5.54558	2.87606	4.57437	1.14938	18.4856
Npnt	2.28494e-05	0.0028854	28	23.913	39.866	5.80856	0.145702	0.003364	0.120254	27.3882	23.0859	20.2299	5.31832	39.8442	0.133478	0.987022	0.646201	40.8369	35.1013	33.1311	35.5708	39.2582	44.0935	47.7887	44.0251	37.2947	34.9165	39.3369	38.5389	2.19404	1.3235	1.92545	2.73133	2.29565	6.13684	1.74363	2.76215	4.78455	3.62191	0.157749	4.43714
Fabp7	9.84403e-07	0.000223119	27.0137	23.9277	310.888	80.4452	0.25876	1.369e-05	0.00218053	25.9482	22.6906	20.987	92.1699	321.642	0.28656	0.98662	0.277606	283.702	303.86	238.004	211.853	289.901	398.275	393.613	355.563	273.713	225.837	281.115	378.845	16.9914	12.6167	19.4957	13.6255	0.219108	13.6741	68.9315	32.1662	16.7272	19.3889	1.45763	0.529423
Tmem44	3.84232e-07	0.000115133	24.0253	24.0147	12.1814	2.13476	0.175248	4.41e-06	0.00091728	24.8049	22.7067	21.9699	2.22746	12.3296	0.18066	0.992278	0.267148	14.9873	11.3059	9.45932	9.04447	12.0638	13.121	14.177	12.8797	11.793	10.6624	13.2644	13.7139	1.10467	0.329399	0.0814387	0.398109	0.480308	0.606032	0.876247	0.0437097	0.658801	0.16239	0.641655	0.514844
Rhoc	0.00901959	0.289396	24.5235	24.3076	163.097	11.164	0.0684504	0.00038809	0.0271203	24.3085	23.5859	23.2866	11.4006	162.206	0.0702845	0.964816	0.552552	194.525	174.743	156.306	154.719	163.351	167.306	173.501	159.812	155.77	149.005	154.554	155.337	13.9098	15.2266	1.55926	3.17805	3.68026	7.12463	14.3342	5.97601	11.0281	0.514267	3.00337	4.37674
Mettl22	0.0119828	0.354082	24.6186	24.4737	2.71988	0.297698	0.109453	0.00030625	0.0236441	25.0925	0.279624	0.26745	0.302368	2.67487	0.11304	0.915485	0.383737	3.48646	2.87467	2.4398	2.35682	2.56337	2.47903	2.94014	3.01229	2.46518	2.63078	2.7757	2.60842	0.228556	0.0710507	0.158721	0.252609	0.138998	0.181152	0.094171	0.0795202	0.0488671	0.0691611	0.0761789	0.0747857
Manf	0.000171918	0.0144153	27.5992	24.9049	72.939	5.80572	0.0795968	0.00030276	0.0235806	26.613	24.3057	21.9192	5.07991	72.7112	0.0698642	0.989256	0.541091	84.1751	73.205	65.6703	68.1231	72.4893	76.4001	75.9752	75.899	71.1687	69.9271	67.0868	69.4289	0.914268	7.61775	0.518971	0.152393	2.07676	5.06762	6.75585	3.168	0.663554	0.791975	3.898	1.63108
Gpr146	0.000160199	0.0138831	26.9126	24.9932	46.1985	2.78396	0.0602607	3.721e-05	0.00463291	25.3208	24.2785	23.0121	2.72136	45.8588	0.0593422	0.976297	0.470454	51.7726	45.6831	44.6835	45.5542	44.7009	46.2142	49.9859	47.3752	45.1034	42.386	43.7783	45.3747	3.37417	0.393308	2.41854	0.483646	0.565864	0.650994	1.21151	0.967166	0.434011	0.857004	0.445301	2.84375
Crym	4.69595e-07	0.000133903	26.8131	24.9966	35.1287	11.9162	0.339214	1.96e-06	0.000587336	25.3049	24.0175	22.779	10.5708	33.3796	0.316684	0.995205	0.362421	61.9915	36.0696	23.1306	21.5464	31.4874	37.9866	44.2121	37.8276	29.1606	26.4345	29.7849	30.5102	14.0502	3.81692	2.5999	0.241524	1.76648	3.31355	4.23901	5.96001	4.45265	3.194	2.60737	1.26261
Bcar1	0.00856871	0.277976	27.0137	25.0513	56.8371	3.639	0.0640252	0.00032761	0.024543	24.9602	0.206671	0.19872	3.53285	56.4272	0.0626089	0.926778	0.542855	67.9066	59.9797	55.0004	52.3372	55.3328	55.6936	59.8892	57.4467	54.6018	53.3663	55.9403	52.0724	8.26724	5.00553	4.96854	0.641901	2.26441	0.693344	0.532402	0.267859	0.66018	1.11476	1.17035	2.83085
Slc3a2	0.000508232	0.0331551	27.0137	26.2918	203.22	8.36332	0.0411541	0.00531441	0.154454	25.4813	0.892658	0.840765	8.85217	203.716	0.0434534	0.94032	0.668245	226.509	213.184	204.959	195.965	196.203	201.936	211.221	204.144	201.549	194.644	196.368	190.776	15.5418	7.90872	1.44906	7.22941	7.40444	4.18947	9.18335	3.09557	0.408361	8.45683	2.88393	12.1133
RP24-230P10.6	0.000212851	0.0167991	27.7113	26.4624	176.045	6.8512	0.0389174	0.00143641	0.0697685	26.7086	26.3123	23.6439	7.0012	177.141	0.0395234	0.989131	0.605194	190.038	182.051	174.925	172.149	173.439	178.087	182.363	181.599	175.578	172.24	167.783	164.021	4.0406	1.51849	0.434055	1.61904	4.36908	2.81833	4.74083	13.821	0.853263	6.49592	6.27964	4.70263
Eef1g	5.88549e-05	0.00613682	27.2735	27.0388	374.411	20.5784	0.0549621	0.00032761	0.024543	25.7529	0.809322	0.754234	17.7009	370.102	0.047827	0.912224	0.436527	439.308	405.57	366.718	349.678	355.3	374.415	378.084	370.936	373.617	367.724	353.437	355.331	29.9337	21.0978	4.7645	13.2545	2.01248	5.94396	21.427	7.87459	8.75109	5.34737	0.509049	12.1014
Pycrl	0.0171775	0.447536	27.8254	27.3392	36.8113	2.13026	0.0578696	0.00051984	0.0336658	25.8778	0.389092	0.360858	2.25443	36.5803	0.0616296	0.884146	0.486171	43.4455	39.3767	34.6252	34.8093	36.4058	35.5795	38.1344	37.4266	36.1082	36.4738	35.0672	33.9237	2.41727	0.822209	2.48423	0.883995	2.54189	0.398674	0.232215	0.389585	2.08633	1.85233	0.926469	0.215755
